# Supplementary material for: Magnetic polyvinylpolypyrrolidone polymer composite-supported copper(i) catalyst: an efficient and easily reusable catalyst for sustainable synthesis of 1,2,3-triazoles in water
Source: Royal Society of Chemistry journal article supplement (doi:10.1039/d4su00292j), 2024-01-01

## **Magnetic Polyvinylpyrrolidone Polymer Composite-Supported Copper(I) Catalyst: An Efficient and Easily Reusable Catalyst for Sustainable Synthesis of 1,2,3-Triazoles in Water**

Noura Aflak,<sup>a,b\*</sup> Fatima-Ezzahraa Essebbar,<sup>b</sup> Lahoucine Bahsis,<sup>b</sup> Hicham Ben El Ayouchia,<sup>b</sup> Hafid Anane,<sup>b</sup> Miguel Julve,<sup>c</sup> Salah-Eddine Stiriba<sup>b,c\*</sup>

<sup>a</sup> *Département de Chimie, Faculté des Sciences d'Agadir, Université Ibn Zohr, 80000 Agadir, Morocco.*

<sup>b</sup> *Laboratoire de Chimie Analytique et Moléculaire/LCAM, Faculté Polydisciplinaire de Safi, Université Cadi Ayyad, 46030 Safi, Morocco.*

<sup>c</sup> *Instituto de Ciencia Molecular /ICMol, Universidad de Valencia, C/. Catedrático José Beltrán 2, 46980 Valencia, Spain.*

Corresponding authors: [noura.aflak@gmail.com](mailto:noura.aflak@gmail.com) (N. Aflak), [stiriba@uv.es](mailto:stiriba@uv.es) (S.-E. Stiriba)

### **SUPPORTING INFORMATION**

**Table S1.** Comparison of the prepared catalyst with other literature procedures concerning the click reaction between benzyl azide and phenylacetylene.

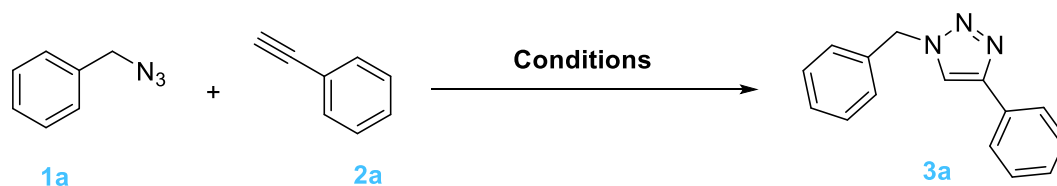

| Entry | Catalyst <sup>a</sup> (Copper loading)                                   | Solvent/ <i>T</i> (°C)      | Time    | Yield (%) | Ref.             |
|-------|--------------------------------------------------------------------------|-----------------------------|---------|-----------|------------------|
| 1     | CPF-1 (2 mol%)                                                           | Methanol/80 °C              | 8 h     | 97        | 1                |
| 2     | CuI-Fe <sub>3</sub> O <sub>4</sub> @SiO <sub>2</sub> (TMS-EDTA) (5 mol%) | Ethanol/r.t.                | 120 min | 97        | 2                |
| 3     | Cu(II)/GQDs/NiFe <sub>2</sub> O <sub>4</sub> (0.947 mol%)                | H <sub>2</sub> O/60 °C      | 20 min  | 98        | 3                |
| 4     | MnFe <sub>2</sub> O <sub>4</sub> @GO@CS/Cu (5 mol%)                      | H <sub>2</sub> O/EtOH/50 °C | 30 min  | 95        | 4                |
| 5     | CuNPs-PVPP (1 mol%)                                                      | H <sub>2</sub> O/r.t.       | 8 h     | 96        | 5                |
| 7     | Cu(I)/PVPP-Fe <sub>3</sub> O <sub>4</sub> (0.2 mol%)                     | H <sub>2</sub> O/r.t.       | 6 h     | 92        | <b>This work</b> |

Abbreviations: CPF= copper-containing polyoxomolybdates-based framework; CS= chitosan; GQDs = graphene quantum dots; GO= graphene oxide.

**Table S2.** Concentration of phenylacetylene in the reactions studied at the optimized reaction

| Concentration of phenylacetylene (in ppm) |                         |                         |                         |
|-------------------------------------------|-------------------------|-------------------------|-------------------------|
| Time (h)                                  | Reaction 1 <sup>a</sup> | Reaction 2 <sup>b</sup> | Reaction 3 <sup>c</sup> |
| 0                                         | 5645.3358               | 5610.8334               | 6427.9766               |
| 0.5                                       | 4097.9068               | 5115.1649               | 5937.12708              |
| 1                                         | 2461.85808              | 3099.18947              | 3879.78262              |
| 2                                         | 1223.44668              | 1930.91836              | 2042.3204               |
| 3                                         | 815.09916               | 1266.66467              | 1226.81721              |
| 4                                         | 407.51849               | 787.260782              | 858.016992              |
| 6                                         | 0                       | 118.475623              | 158.932211              |

<sup>a</sup>CuAAC reaction between benzyl azide and phenylacetylene catalyzed by fresh catalyst.

<sup>b</sup>CuAAC reaction between benzyl azide and phenylacetylene catalyzed by the first reused catalyst. <sup>c</sup>CuAAC reaction between phenylacetylene and the *in situ* formed benzyl azide from benzyl bromide and sodium azide.

**Table S3.** Concentration of phenylacetylene in the studied hot filtration test at 60 °C (Reaction 4: Reaction 5).

| Time (min) | Concentration of phenylacetylene (in ppm) |                         |
|------------|-------------------------------------------|-------------------------|
|            | Reaction 4 <sup>a</sup>                   | Reaction 5 <sup>b</sup> |
| 0          | 4846.8126                                 | 4436.495                |
| 15         | 2856.95599                                | 2867.90245              |
| 30         | 1222.84725                                | 2777.5076               |
| 60         | 0                                         | 2614.1248               |

<sup>a</sup>The model reaction was carried out at 60 °C. <sup>b</sup>Hot filtration test of the model reaction by removal of the Cu(I)/PVPP-Fe<sub>3</sub>O<sub>4</sub> catalyst at 15 min.

## 1. Characterization of the 1,2,3 triazole products (3a-3k)

### 1-benzyl-4-phenyl-1*H*-1,2,3-triazole (3a)

White solid. Yield: 92%. m.p.: 130-132 °C. <sup>1</sup>H NMR (400 MHz, CDCl<sub>3</sub>, δ ppm): 5.60 (s, 2H, CH<sub>2</sub>); 7.28-7.44 (m, 8H, CH<sub>ar</sub>); 7.68 (s, 1H, CH<sub>triazole</sub>); 7.81-7.83 (d, 2H, CH<sub>ar</sub>). <sup>13</sup>C NMR (100 MHz, CDCl<sub>3</sub>, δ ppm): 54.4 (CH<sub>2</sub>); 119.5 (CH<sub>ar</sub>); 125.9 (3CH<sub>ar</sub>); 127.8 (2CH<sub>ar</sub>); 128.2 (2CH<sub>ar</sub>); 129.2 (CH<sub>triazole</sub>); 131.5 (C<sub>ar</sub>); 135.0 (C<sub>ar</sub>); 148.3 (C<sub>triazole</sub>). HR-MS (FAB+) *m/z*: Calcd for C<sub>15</sub>H<sub>14</sub>N<sub>3</sub>: 236.1188; Found: 236.1177. NMR data are in accordance with those reported for this compound<sup>6</sup>.

### 1-Benzyl-4-*p*-tolyl-1*H*-1,2,3-triazole (3b)

White solid. Yield: 83%. m.p.: 154-155 °C. <sup>1</sup>H NMR (400 MHz, CDCl<sub>3</sub>, δ ppm): 2.38 (s, 3H, CH<sub>3</sub>), 5.59 (s, 2H, CH<sub>2</sub>), 7.22-7.42 (m, 7H, CH<sub>ar</sub>), 7.66 (s, 1H, CH<sub>triazole</sub>), 7.70-7.73 (d, 2H, CH<sub>ar</sub>). <sup>13</sup>C NMR (100 MHz, CDCl<sub>3</sub>, δ ppm): 21.67 (CH<sub>3</sub>), 54.64 (CH<sub>2</sub>), 126.00 (CH<sub>ar</sub>), 128.14 (2CH<sub>ar</sub>), 128.47 (2CH<sub>ar</sub>), 129.16 (2CH<sub>ar</sub>), 129.54 (2CH<sub>ar</sub>), 129.88 (C<sub>ar</sub>), 131.68 (CH<sub>triazole</sub>), 135.14 (2C<sub>ar</sub>), 138.41 (C<sub>triazole</sub>). HR-MS (FAB+) *m/z*: Calcd for C<sub>16</sub>H<sub>15</sub>N<sub>3</sub>: 250.1339; Found: 250.1339. NMR data agree with those reported for this compound<sup>7</sup>.

### (1-benzyl-1*H*-1,2,3-triazol-4-yl)methyl benzoate (3c)

White solid. Yield: 99%. m.p.: 122-123 °C. <sup>1</sup>H NMR (400 MHz, CDCl<sub>3</sub>, δ ppm): 5.47 (s, 2H, CH<sub>2</sub>), 5.54 (s, 2H, CH<sub>2</sub>), 7.31-7.38 (m, 5H, CH<sub>ar</sub>), 7.40-7.46 (dd, 1H, CH<sub>ar</sub>), 7.57 (t, 1H, CH<sub>ar</sub>), 7.70 (s, 1H, CH<sub>triazole</sub>), 8.03-8.05 (d, 2H, CH<sub>ar</sub>). <sup>13</sup>C NMR (100 MHz, CDCl<sub>3</sub>, δ ppm): 54.76 (CH<sub>2</sub>), 58.45 (CH<sub>2</sub>), 128.57 (CH<sub>triazole</sub>), 128.77 (2CH<sub>ar</sub>), 129.26 (2CH<sub>ar</sub>), 129.56 (2CH<sub>ar</sub>), 130.14 (4CH<sub>ar</sub>), 133.59 (C<sub>ar</sub>), 134.75 (C<sub>triazole</sub>), 153.18 (C<sub>ar</sub>), 166.84 (C<sub>carbonyl</sub>). HR-MS (FAB+) *m/z*:

Calcd for C<sub>17</sub>H<sub>15</sub>N<sub>3</sub>O<sub>2</sub>: 294.1237; Found: 294.1241. The NMR data align with the previously reported data for this compound<sup>8</sup>.

#### **1-benzyl-4-(phenoxyethyl)-1*H*-1,2,3-triazole (3d)**

White solid. Yield: 99%. m.p.: 122-123 °C. <sup>1</sup>H NMR (400 MHz, CDCl<sub>3</sub>, δ ppm): 5.21 (s, 2H, CH<sub>2</sub>), 5.55 (s, 2H, OCH<sub>2</sub>), 6.96-7.00 (q, 3H, CH<sub>ar</sub>), 7.28-7.33 (q, 4H, CH<sub>ar</sub>), 7.37-7.41 (m, 3H, CH<sub>ar</sub>), 7.57 (s, 1H, CH<sub>triazole</sub>). <sup>13</sup>C NMR (100 MHz, CDCl<sub>3</sub>, δ ppm): 54.70 (CH<sub>2</sub>), 62.46 (CH<sub>2</sub>), 115.18 (2CH<sub>ar</sub>), 121.65 (CH<sub>triazole</sub>), 128.53 (2CH<sub>ar</sub>), 129.22 (2CH<sub>ar</sub>), 129.55 (4CH<sub>ar</sub>), 129.92 (C<sub>ar</sub>), 134.87 (C<sub>triazole</sub>), 158.60 (C<sub>ar</sub>). HR-MS (FAB+) *m/z*: Calcd for C<sub>16</sub>H<sub>15</sub>N<sub>3</sub>O: 266.1288; Found: 266.1289. The NMR data align with the previously reported data for this compound<sup>8</sup>.

#### **4-(1-benzyl-1*H*-1,2,3-triazol-4-yl)benzaldehyde (3e)**

White solid. Yield: 99%. m.p.: 134-135 °C. <sup>1</sup>H NMR (400 MHz, CDCl<sub>3</sub>, δ ppm): 5.62 (s, 2H, CH<sub>2</sub>); 7.28-7.43 (m, 5H, CH<sub>ar</sub>); 7.8 (s, 1H, CH<sub>triazole</sub>); 7.92-7.94 (d, 2H, CH<sub>ar</sub>); 7.98-8.00 (d, 2H, CH<sub>ar</sub>); 10.02 (s, 1H, CHO). <sup>13</sup>C NMR (100 MHz, CDCl<sub>3</sub>, δ ppm): 54.4 (CH<sub>2</sub>); 120.7 (CH<sub>ar</sub>); 126.0 (2CH<sub>ar</sub>); 128.2 (2CH<sub>ar</sub>); 129.0 (2CH<sub>ar</sub>); 129.3 (2CH<sub>ar</sub>); 130.4 (CH<sub>triazole</sub>); 134.3 (CH<sub>ar</sub>); 135.8 (CH<sub>ar</sub>); 136.3 (CH<sub>ar</sub>); 146.9 (C<sub>triazole</sub>); 191.7 (CHO). HR-MS (FAB+) *m/z*: Calcd for C<sub>16</sub>H<sub>14</sub>N<sub>3</sub>O: 264.1137; Found: 264,1134. NMR data agree with those reported for this compound<sup>8</sup>.

#### **Methyl 4-(1-benzyl-1*H*-1,2,3-triazol-4-yl)benzoate (3f)**

White solid. Yield: 75%. m.p.: 176-177 °C. <sup>1</sup>H NMR (400 MHz, CDCl<sub>3</sub>, δ ppm): 3.94 (s, 3H, CH<sub>3</sub>), 5.61 (s, 2H, CH<sub>2</sub>), 7.33-7.36 (m, 2H, CH<sub>ar</sub>), 7.40-7.43 (m, 3H, CH<sub>ar</sub>), 7.76 (s, 1H, CH<sub>triazole</sub>), 7.88-7.91 (d, 2H, CH<sub>ar</sub>), 8.08-8.11 (d, 2H, CH<sub>ar</sub>). <sup>13</sup>C NMR (100 MHz, CDCl<sub>3</sub>, δ ppm): 52.54 (CH<sub>2</sub>), 54.78 (CH<sub>2</sub>), 120.73 (CH<sub>ar</sub>), 125.87 (CH<sub>ar</sub>), 128.55 (2CH<sub>ar</sub>), 129.35 (2CH<sub>ar</sub>), 129.65 (2CH<sub>ar</sub>), 130.01 (CH<sub>ar</sub>), 130.59 (CH<sub>triazole</sub>), 134.80 (C<sub>ar</sub>), 135.22 (C<sub>ar</sub>), 148.06 (C<sub>triazole</sub>), 156.25 (C<sub>ar</sub>), 167.16 (C<sub>carbonyl</sub>). HR-MS (FAB+) *m/z*: Calcd for C<sub>17</sub>H<sub>15</sub>N<sub>3</sub>O<sub>2</sub>: 294.1237; Found: 294.1242. NMR data are in accordance with those reported for this compound<sup>8</sup>.

#### **Ethyl 1-benzyl-1*H*-1,2,3-triazole-4-carboxylate (3g)**

White solid. Yield: 53%. m.p.: 89-90 °C. <sup>1</sup>H NMR (400 MHz, CDCl<sub>3</sub>, δ ppm): 1.35-1.40 (t, 3H, CH<sub>3</sub>); 4.35-4.42 (q, 4H, OCH<sub>2</sub>); 5.57 (s, 2H, CH<sub>2</sub>); 7.26-7.29 (m, 3H, CH<sub>ar</sub>); 7.37-7.4 (m, 3H, CH<sub>ar</sub>); 7.96 (s, 1H, CH<sub>triazol</sub>). <sup>13</sup>C NMR (100 MHz, CDCl<sub>3</sub>, δ ppm): 14.4 (CH<sub>3</sub>); 54.6 (CH<sub>2</sub>); 61.4 (CH<sub>2</sub>); 127.4 (CH<sub>ar</sub>); 128.4 (2CH<sub>ar</sub>); 129.3 (CH<sub>ar</sub>); 129.4 (CH<sub>ar</sub>); 133.8 (CH<sub>triazolic</sub>); 140.7

(C<sub>Triazolic</sub>); 160.8 (CO). HR-MS (FAB+) *m/z*: Calcd for C<sub>12</sub>H<sub>14</sub>N<sub>3</sub>O<sub>2</sub>: 232.1086; Found: 232.1087. NMR data agree with those reported for this compound<sup>6</sup>.

#### **4-((4-phenyl-1*H*-1,2,3-triazol-1-yl)methyl)pyridine (3h)**

White solid. Yield: 95%. m.p.: 81.3 °C. <sup>1</sup>H NMR (400 MHz, CDCl<sub>3</sub>, δ ppm): 5.73 (s, 2H, CH<sub>2</sub>); 7.25-7.36 (m, 2H, CH<sub>ar</sub>); 7.41-7.46 (m, 3H, CH<sub>ar</sub>); 7.69-7.75 (m, 1H, CH<sub>ar</sub>); 7.83-7.87 (m, 1H, CH<sub>ar</sub>); 7.96 (s, 1H, CH<sub>Triazole</sub>); 8.64 (s, 2H, CH<sub>ar</sub>). <sup>13</sup>C NMR (100 MHz, CDCl<sub>3</sub>, δ ppm): 56.11 (CH<sub>2</sub>); 120.57 (2 CH<sub>ar</sub>); 124.00 (2 CH<sub>ar</sub>); 126.13 (CH<sub>ar</sub>); 128.58 (2 CH<sub>ar</sub>); 129.21 (C<sub>ar</sub>); 130.93 (CH<sub>Triazole</sub>); 137.84 (C<sub>ar</sub>); 150.13 (C<sub>Triazole</sub>); 154.91 (2 CH<sub>ar</sub>). HR-MS MS (FAB+) *m/z*: Calcd for C<sub>14</sub>H<sub>12</sub>N<sub>4</sub>: 236.1062; Found: 237.1132. The NMR data align with the previously reported data for this compound<sup>8</sup>.

#### **1,4-diphenyl-1*H*-1,2,3-triazole (3i)**

White solid. Yield: 72%. m.p.: 183–184 °C. <sup>1</sup>H NMR (400 MHz, CDCl<sub>3</sub>, δ ppm): 7.33–7.4 (m, 2H, CH<sub>ar</sub>); 7.44–7.49 (t, 2H, CH<sub>ar</sub>); 7.53–7.58 (t, 2H, CH<sub>ar</sub>); 7.79–7.81 (d, 2H, CH<sub>ar</sub>); 7.92–7.94 (d, 2H, CH<sub>ar</sub>); 8.22 (s, 1H, CH<sub>Triazole</sub>). <sup>13</sup>C NMR (100 MHz, CDCl<sub>3</sub>, δ ppm): 118.07 (2CH<sub>ar</sub>); 120.98 (C<sub>ar</sub>); 126.34 (2 CH<sub>ar</sub>); 128.98 (CH<sub>ar</sub>); 129.31 (CH<sub>ar</sub>); 129.37 (2CH<sub>ar</sub>); 130.23 (2CH<sub>ar</sub>); 130.34 (CH<sub>Triazolic</sub>); 130.73 (C<sub>ar</sub>); 137.47 (C<sub>Triazolic</sub>). HR-MS (FAB+) *m/z*: Calcd for C<sub>14</sub>H<sub>12</sub>N<sub>3</sub>: 222.1031; Found: 222.1029. The NMR data align with the previously reported data for this compound<sup>6</sup>.

#### **4-(phenoxyethyl)-1-phenyl-1*H*-1,2,3-triazole (3j)**

White solid. Yield: 93%. m.p.: 87-88 °C. <sup>1</sup>H NMR (400 MHz, CDCl<sub>3</sub>, δ ppm): 5.23 (s, 2H, CH<sub>2</sub>), 6.89-6.97 (m, 3H, CH<sub>ar</sub>), 7.18-7.27 (d, 2H, CH<sub>ar</sub>), 7.37-7.45 (m, 3H, CH<sub>ar</sub>), 7.65-7.68 (d, 2H, CH<sub>ar</sub>), 7.98 (s, 1H, CH<sub>Triazole</sub>). <sup>13</sup>C NMR (100 MHz, CDCl<sub>3</sub>, δ ppm): 62.40 (CH<sub>2</sub>), 115.18 (2CH<sub>ar</sub>), 121.03 (CH<sub>Triazole</sub>), 121.28 (CH<sub>ar</sub>), 121.77 (2CH<sub>ar</sub>), 129.28 (C<sub>ar</sub>), 130.01 (CH<sub>ar</sub>), 130.18 (2CH<sub>ar</sub>), 137.40 (2CH<sub>ar</sub>), 145.49 (C<sub>Triazole</sub>), 158.58 (C<sub>ar</sub>). HR-MS (FAB+) *m/z*: Calcd for C<sub>15</sub>H<sub>13</sub>N<sub>3</sub>O: 252.1130; Found: 252.1129. The NMR data agree with the previously reported data for this compound<sup>8</sup>.

### (1-phenyl-1*H*-1,2,3-triazol-4-yl)methyl benzoate (3k)

White solid. Yield: 82%. m.p.: 110-111 °C. <sup>1</sup>H NMR (400 MHz, CDCl<sub>3</sub>, δ ppm): 5.59 (s, 2H, CH<sub>2</sub>), 7.46-7.59 (m, 5H, CH<sub>ar</sub>), 7.75-7.77 (d, 2H, CH<sub>ar</sub>), 8.07-8.11 (d, 2H, CH<sub>ar</sub>), 8.16 (s, 1H, CH<sub>Triazole</sub>). <sup>13</sup>C NMR (100 MHz, CDCl<sub>3</sub>, δ ppm): 58.45 (CH<sub>2</sub>), 118.65 (CH<sub>Triazole</sub>), 121.07 (C<sub>ar</sub>), 122.69 (2CH<sub>ar</sub>), 124.12 (2CH<sub>ar</sub>), 128.83 (CH<sub>ar</sub>), 129.34 (2 CH<sub>ar</sub>), 130.18 (C<sub>ar</sub>), 133.67 (C<sub>ar</sub>), 137.32 (CH<sub>ar</sub>), 144.09 (C<sub>Triazole</sub>), 166.93 (C<sub>Carbonyl</sub>). HR-MS (FAB+) *m/z*: Calcd for C<sub>16</sub>H<sub>13</sub>N<sub>3</sub>O<sub>2</sub>: 280.1080; Found: 280.1080. The NMR data align with the previously reported data for this compound<sup>8</sup>.

## 2. References

- 1 S. Fu, G. Liu, S. Liu, Z. Gao, S. Tao, Y. Peng, N. Xin, X. Huang and G. Yang, *Mol Catal*, 2024, **562**, 114185.
- 2 M. Darroudi, S. Ranjbar, M. Esfandiar, M. Khoshneviszadeh, M. Hamzehloueian, M. Khoshneviszadeh and Y. Sarrafi, *Appl Organomet Chem*, 2020, **34**(12), e5962.
- 3 R. Deilam, F. Moeinpour and F. S. Mohseni-Shahri, *Monatsh Chem*, 2020, **151**, 1153–1162.
- 4 M. Mahdaviniasab, M. Hamzehloueian and Y. Sarrafi, *Int J Biol Macromol*, 2019, **138**, 764–772.
- 5 L. Bahsis, M. El Himri, H. Ben El Ayouchia, H. Anane, E. Ablouh, M. Julve and S. Stiriba, *Macromol Chem Phys*, 2019, **220**(21), 1900311.
- 6 N. Aflak, H. Ben El Ayouchia, L. Bahsis, E. M. El Mouchtari, M. Julve, S. Rafqah, H. Anane and S.-E. Stiriba, *Front Chem*, 2019, **7**, 81.
- 7 N. Aflak, E. M. El Mouchtari, H. Ben El Ayouchia, H. Anane, S. Rafqah, M. Julve and S.-E. Stiriba, *Catalysts*, 2022, **12**, 1244.
- 8 N. Aflak, L. EL Mersly, H. Ben EL Ayouchia, S. Rafqah, H. Anane, M. Julve and S. E. Stiriba, *J Coord Chem*, 2022, **75**, 2346–2358.

**1-benzyl-4-phenyl-1*H*-1,2,3-triazole (3a)**

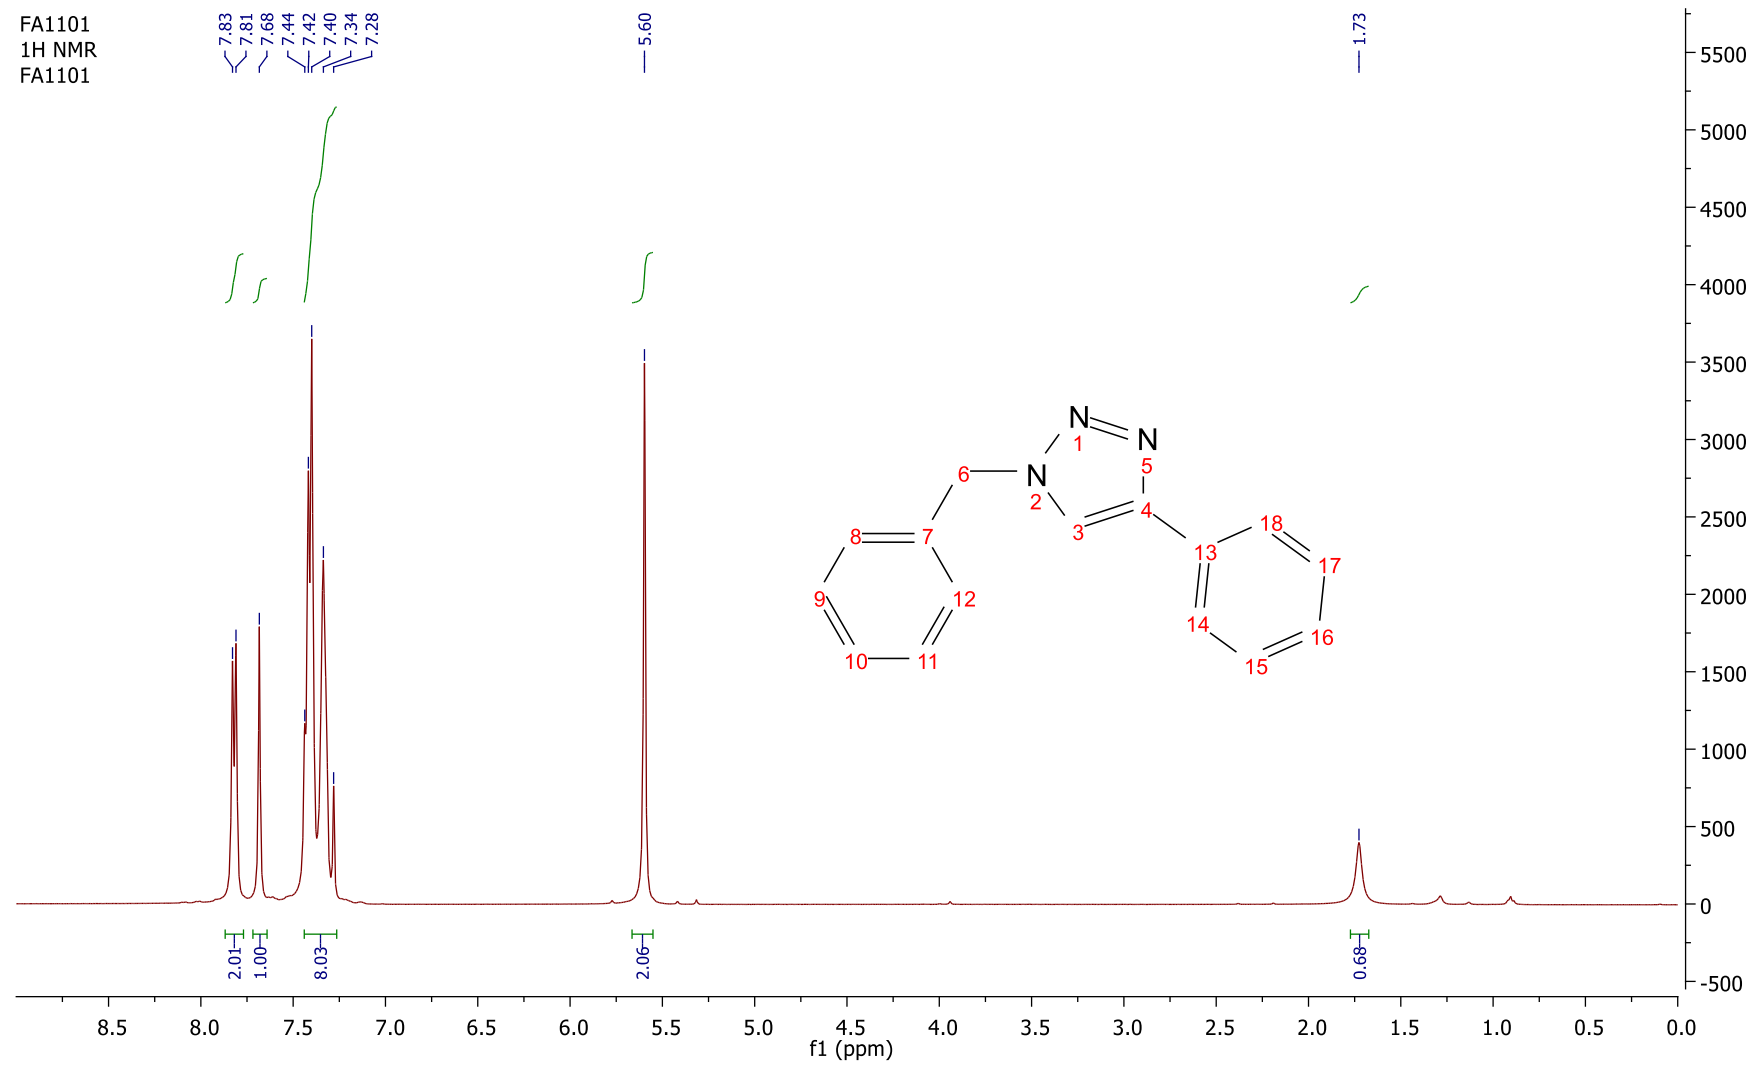

FA1101  
FA 1101  
13C NMR

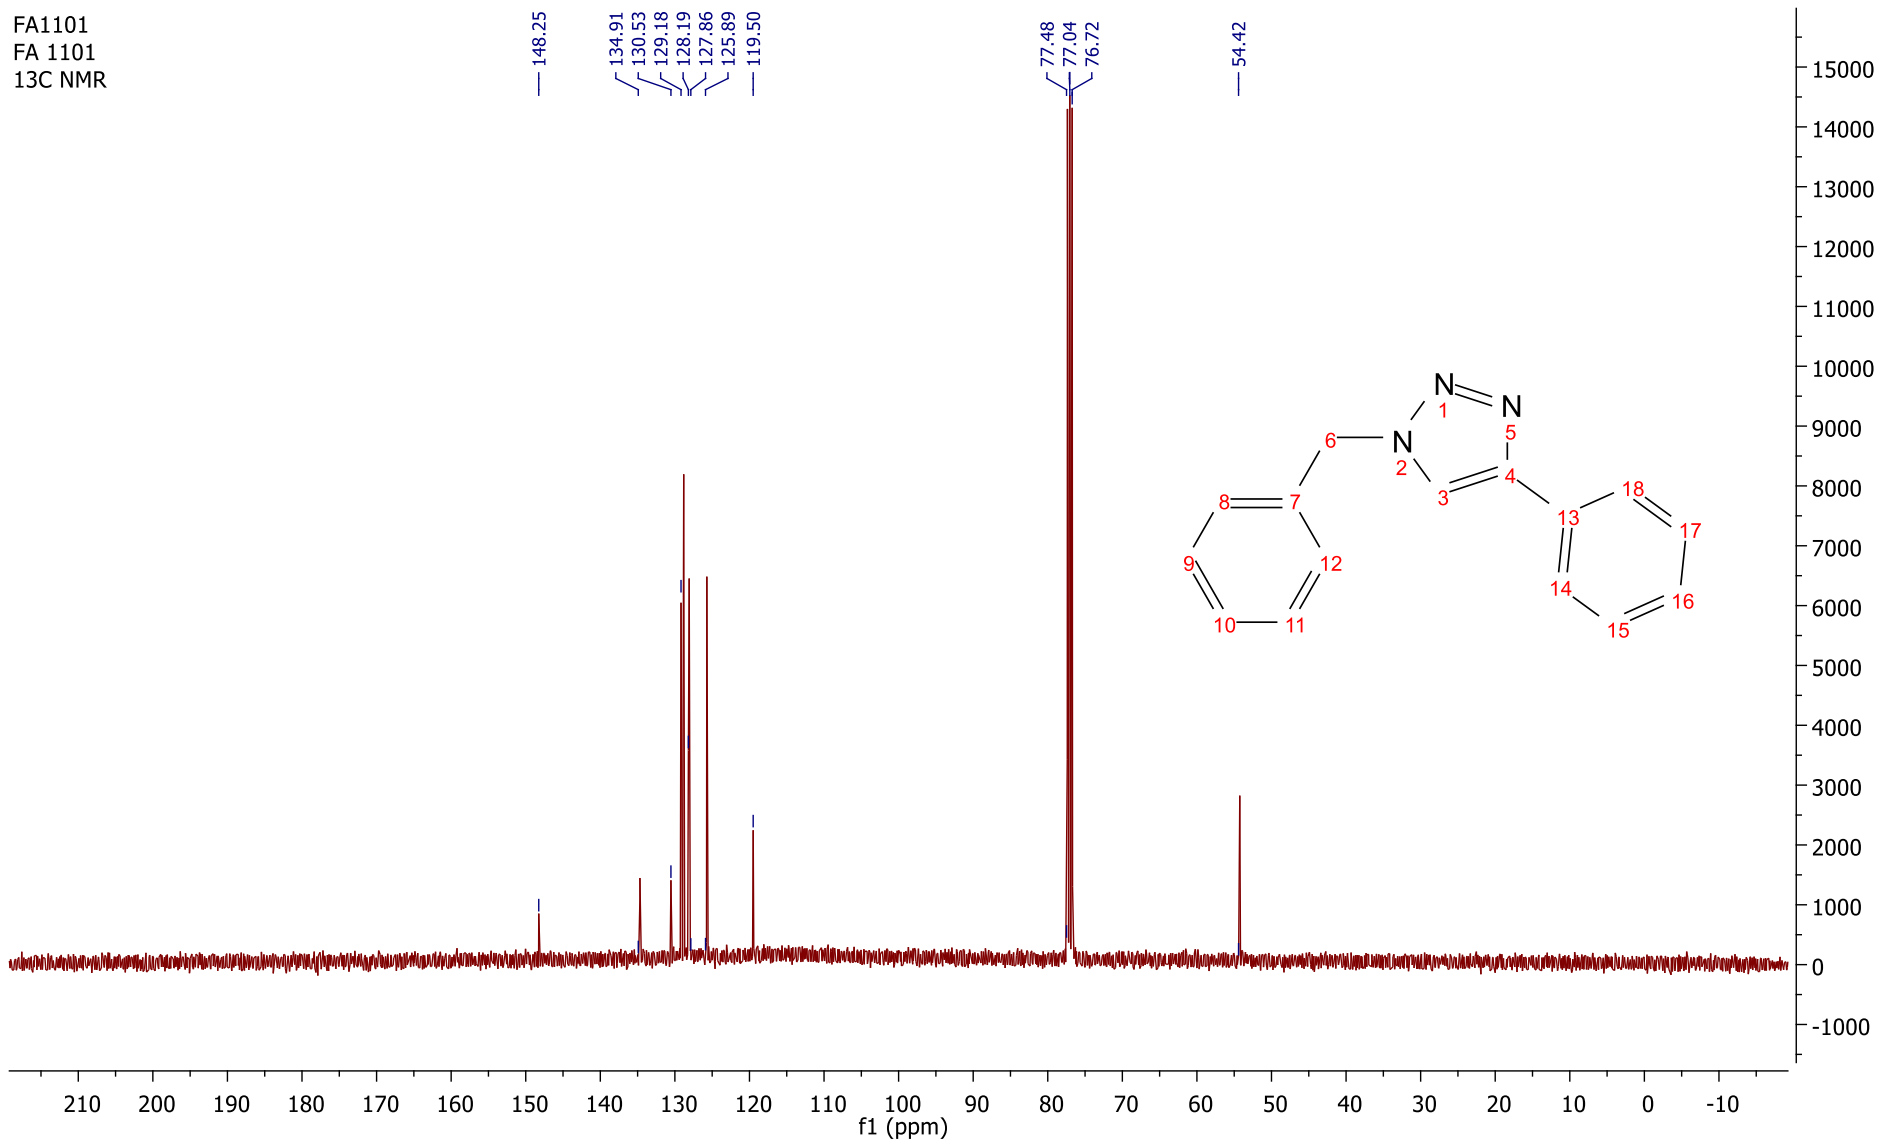



FA1101  
Dept 135  
FA 1101

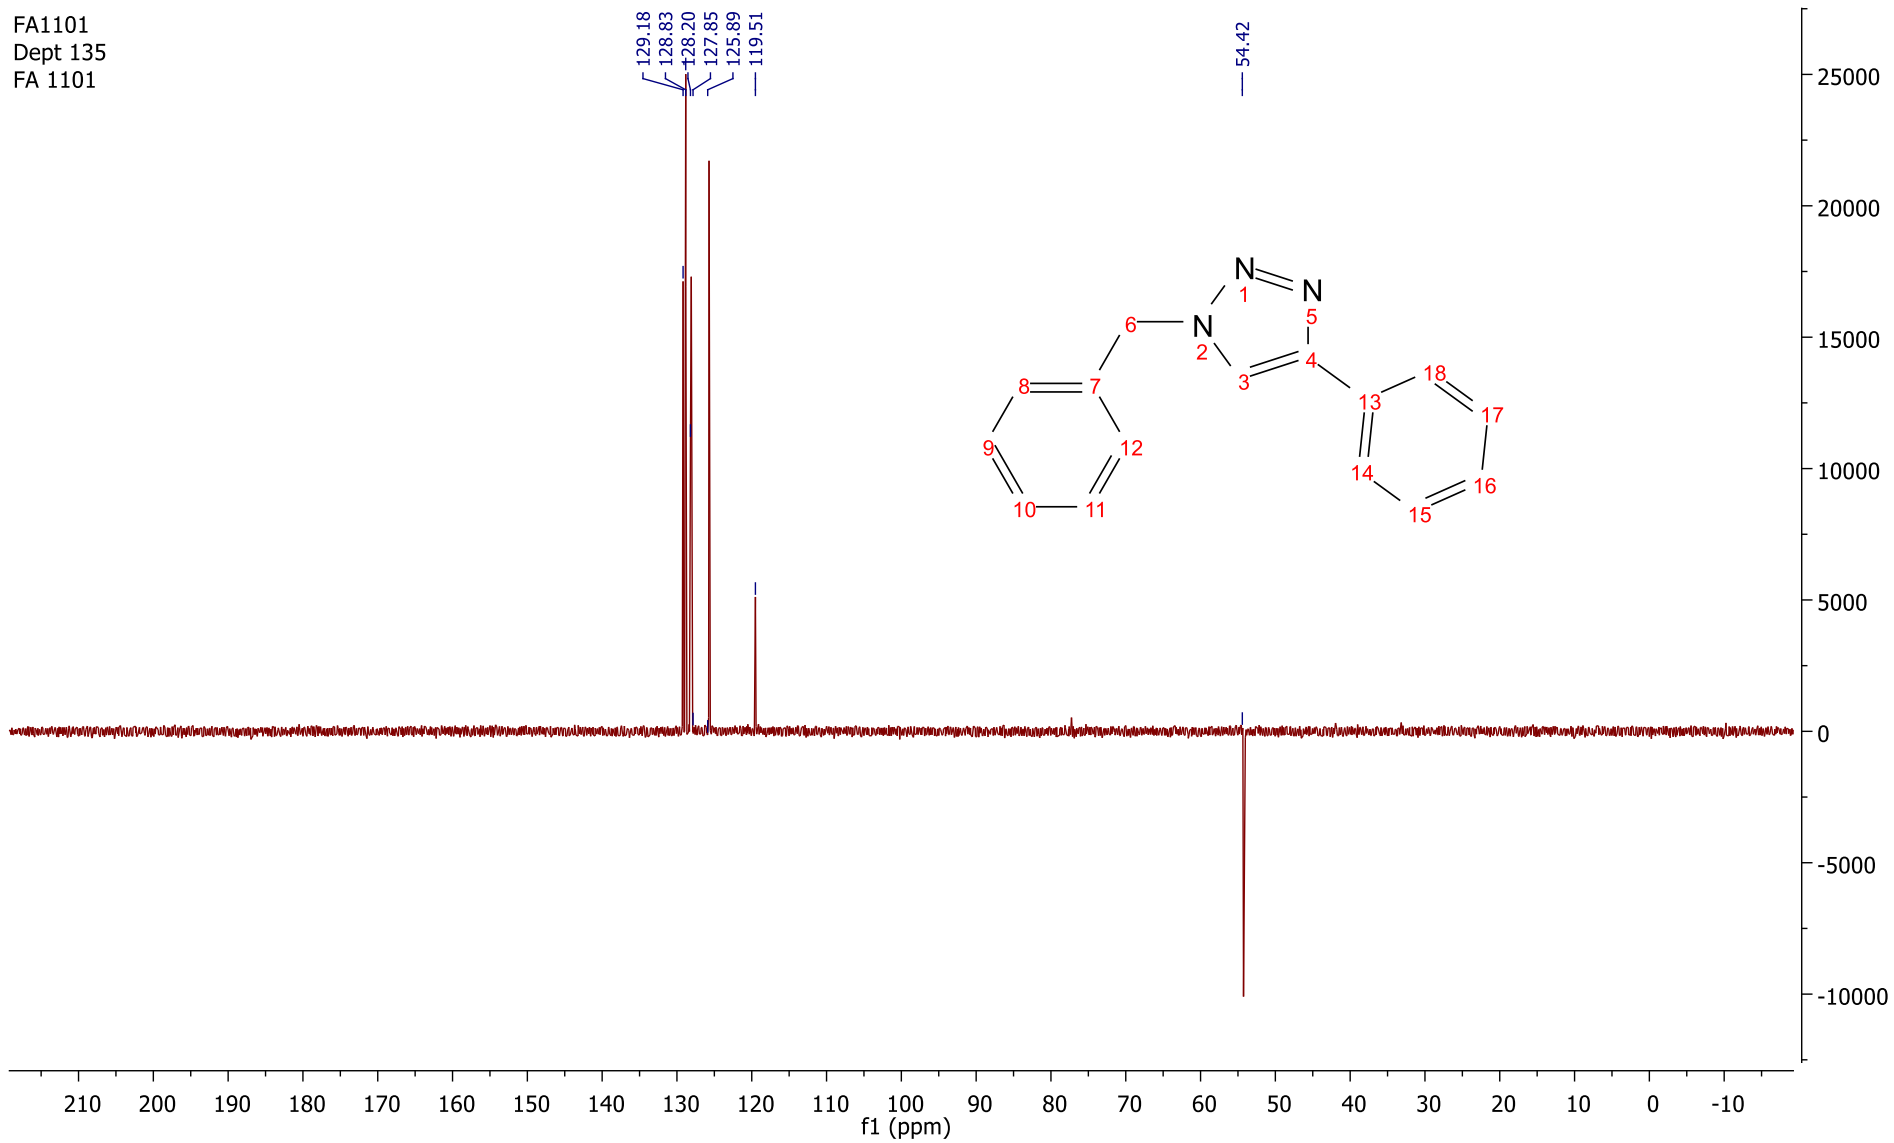

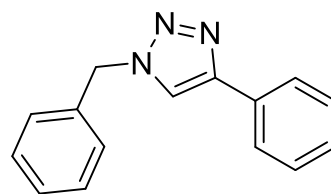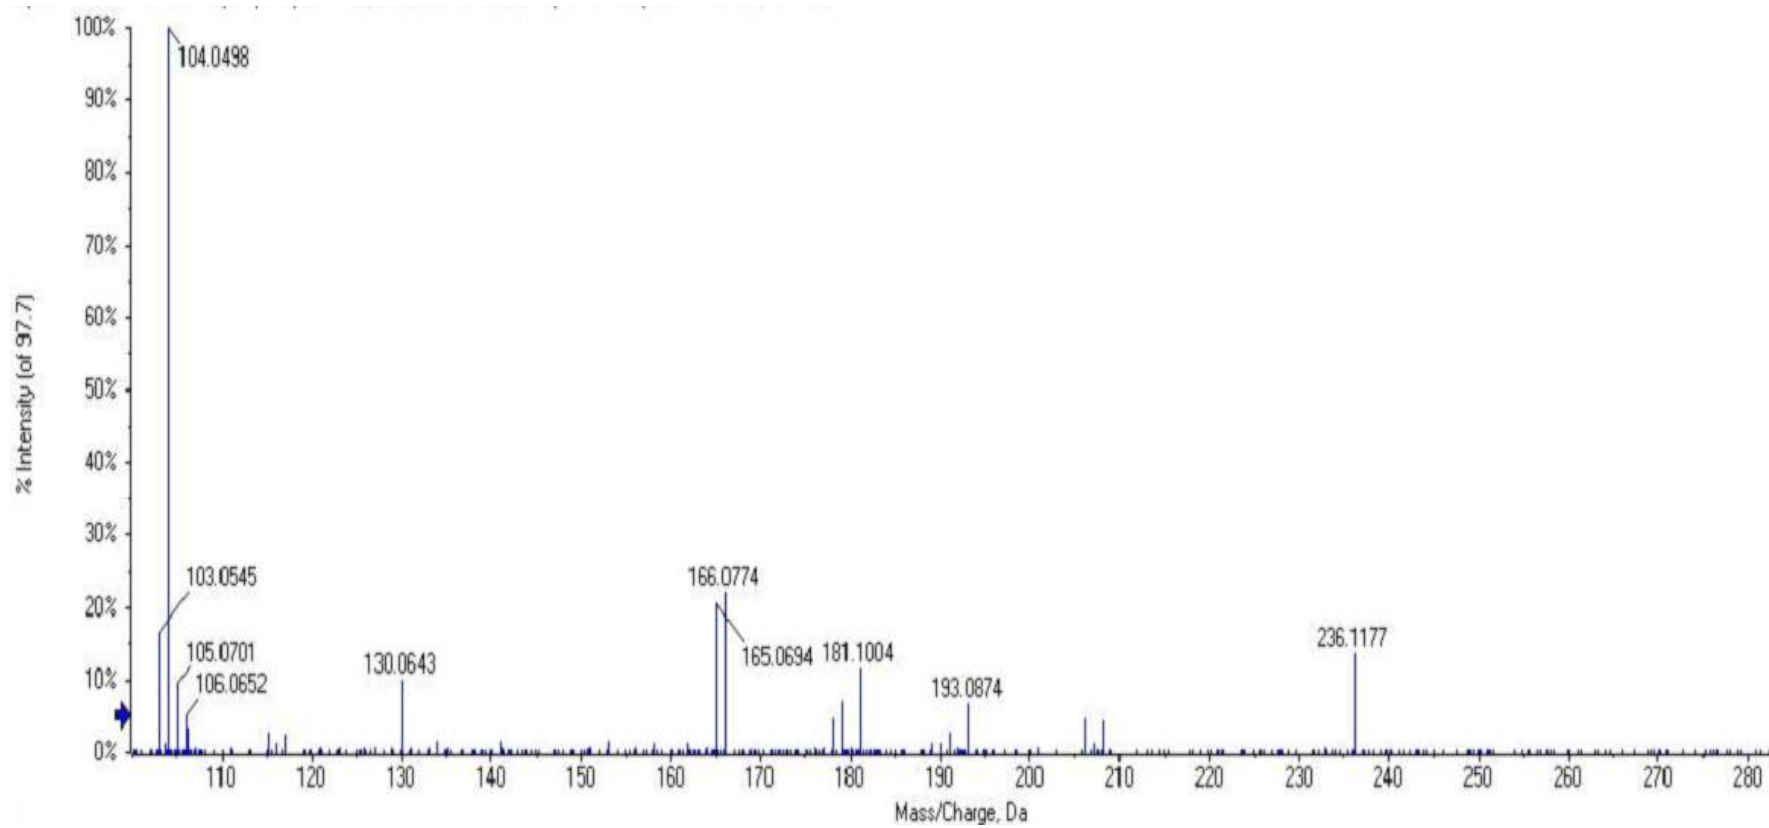

1- Benzyl-4-p-tolyl-1H-1,2,3-triazole (3b)

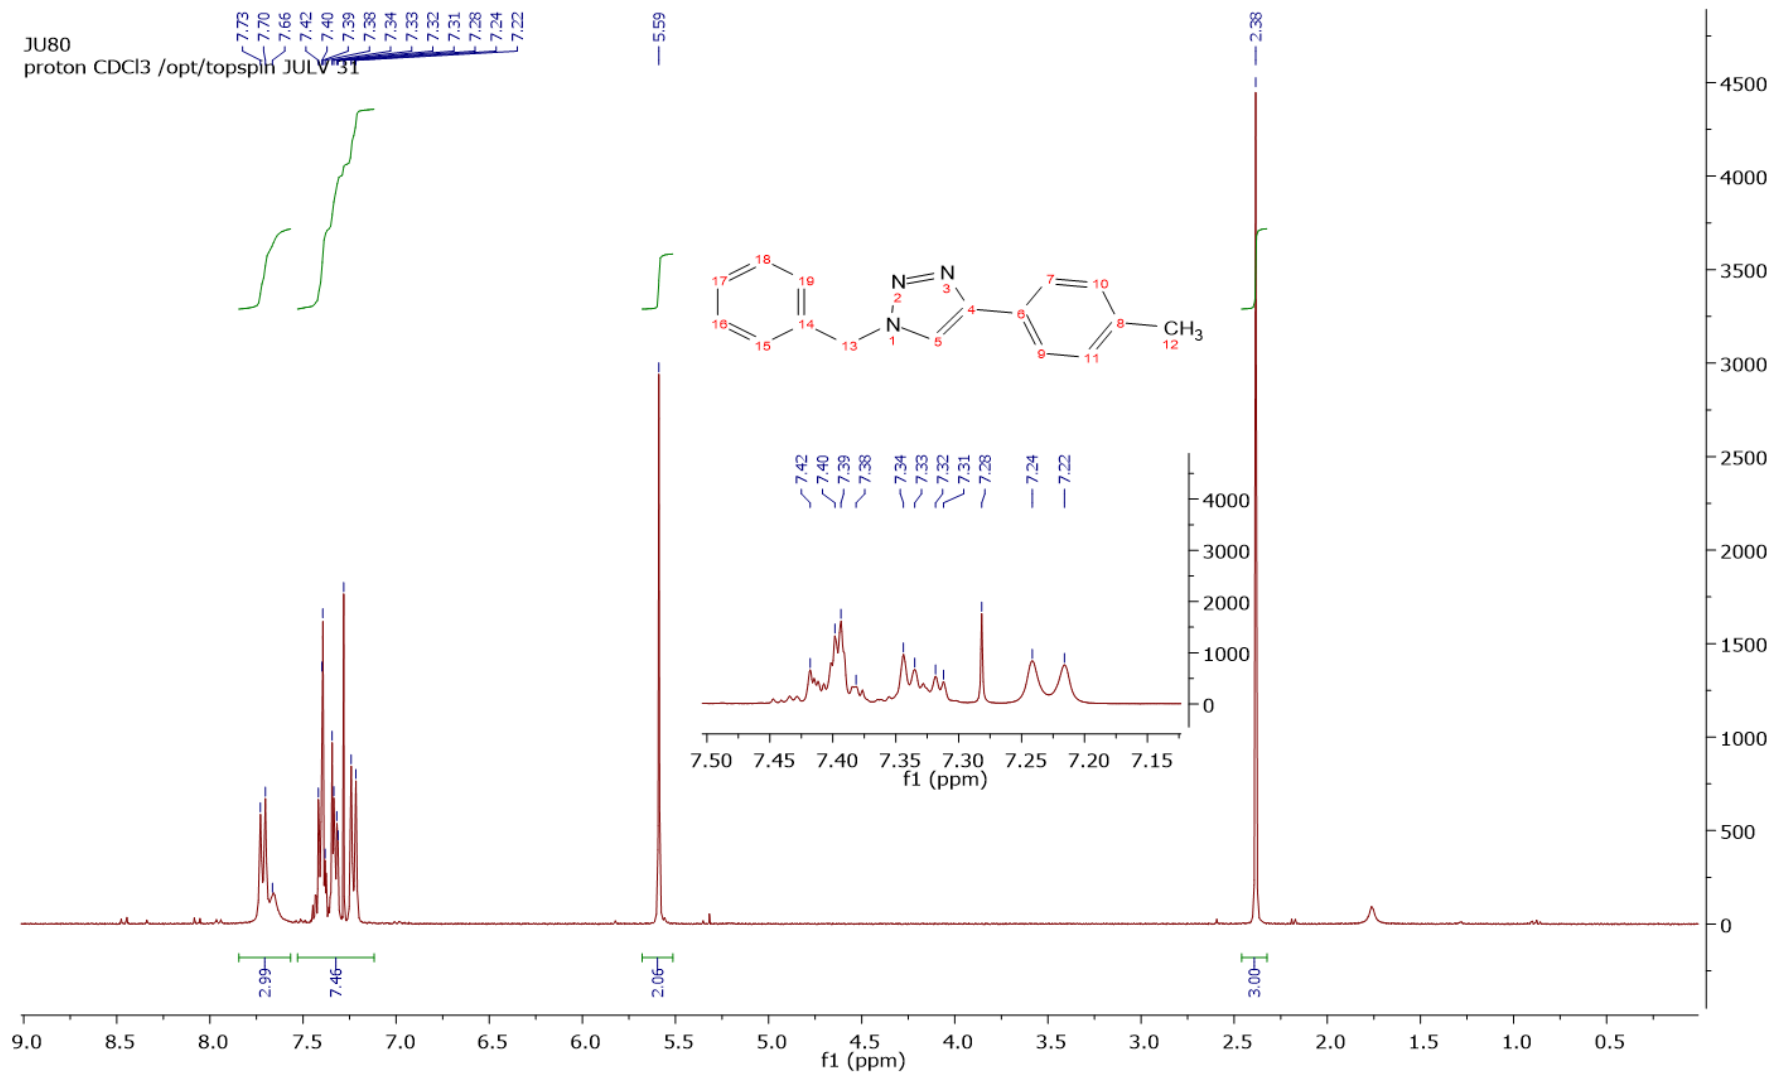

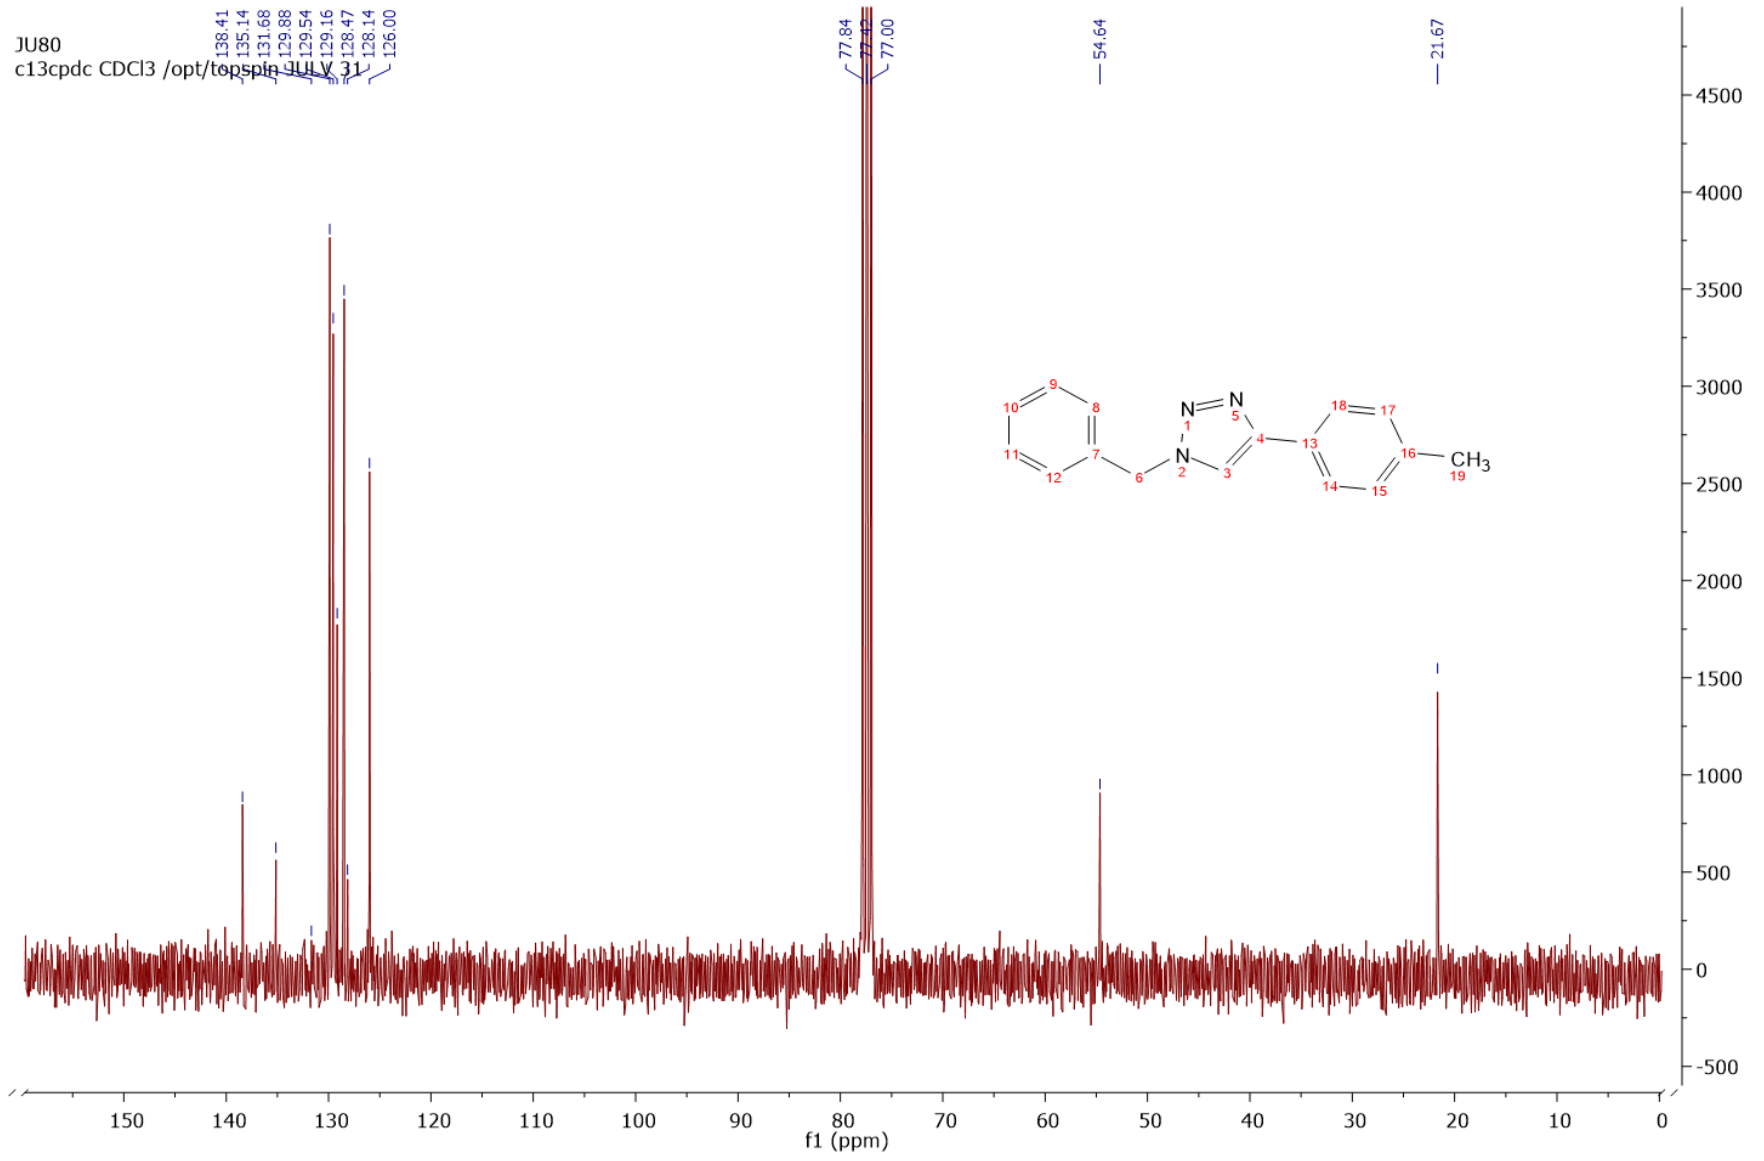

JU80  
c13dept135c CDCl3 /opt/topspin JULV 31

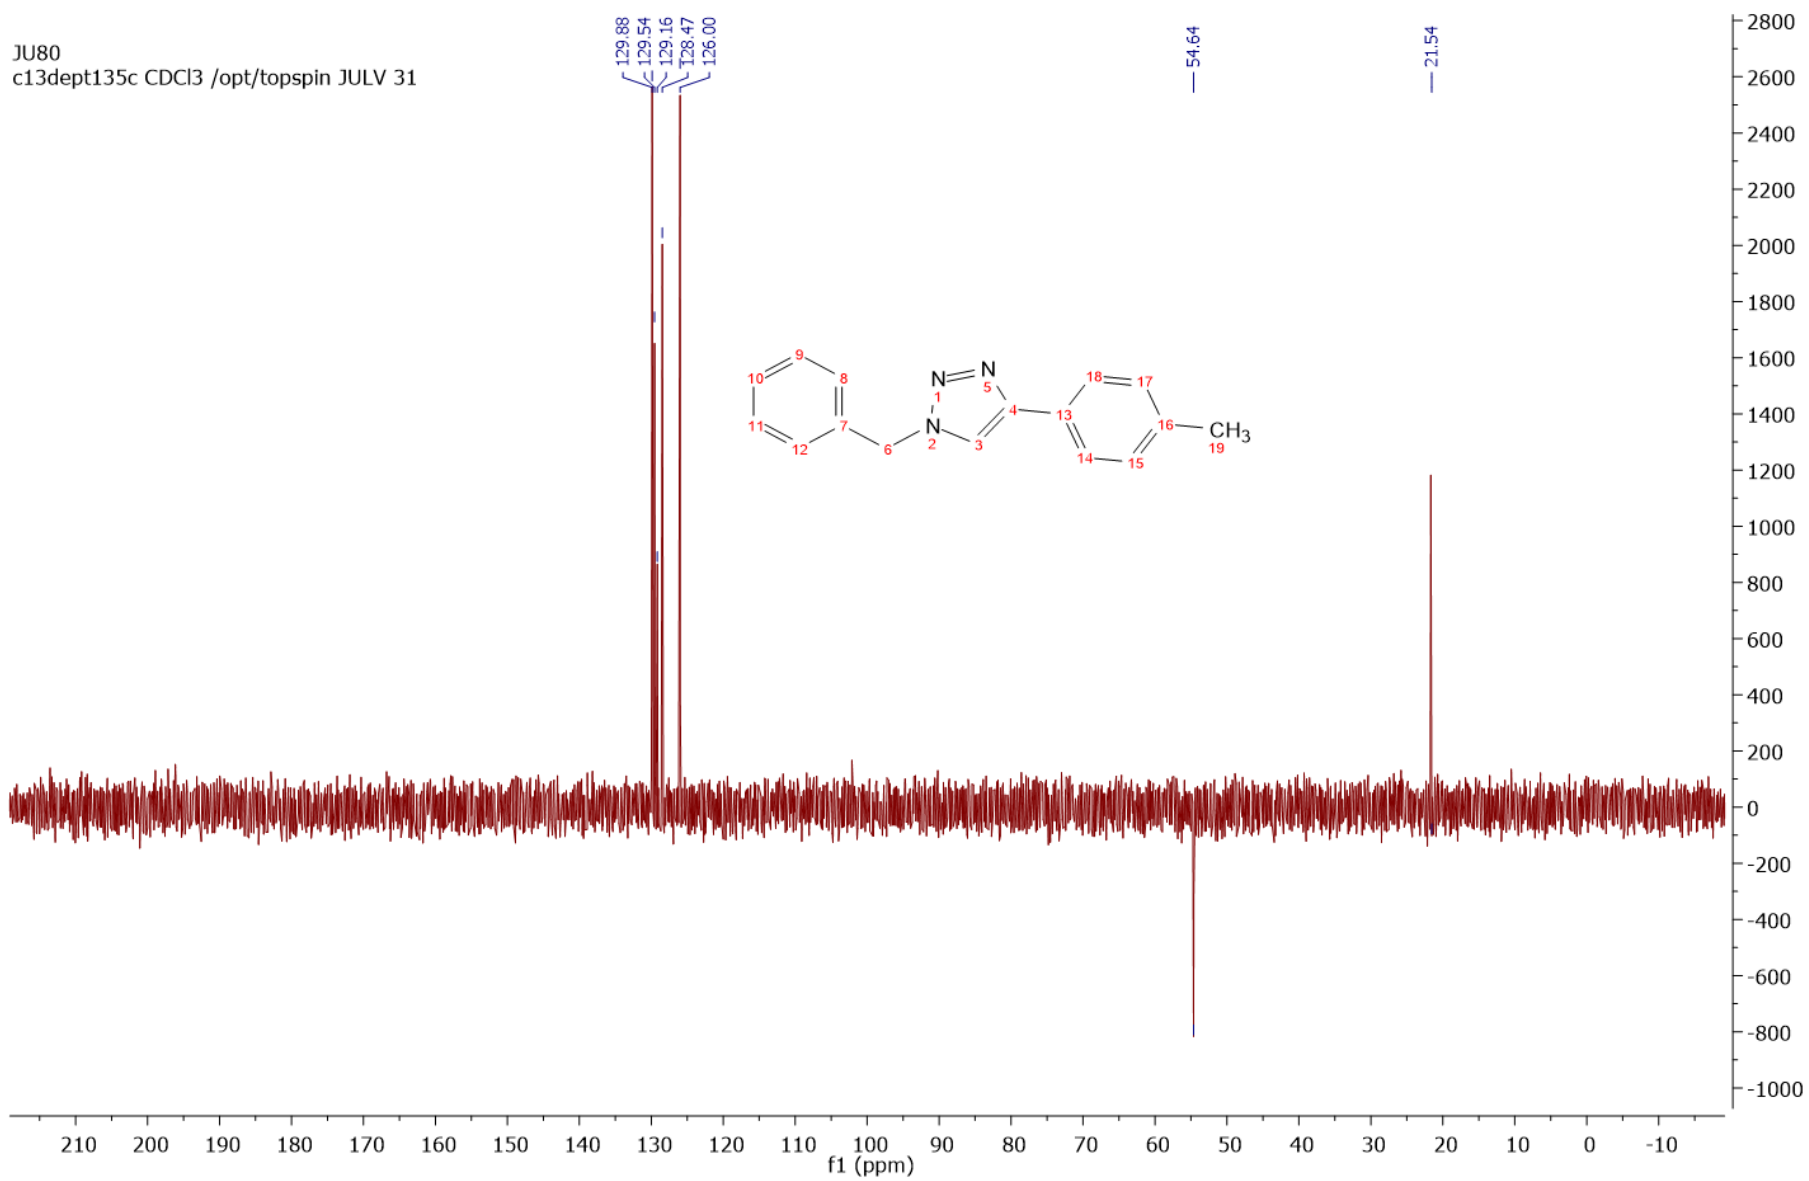

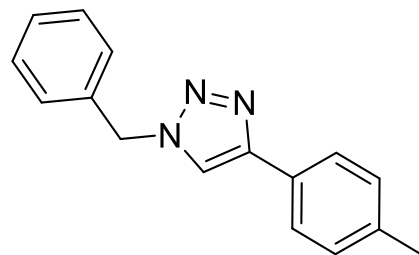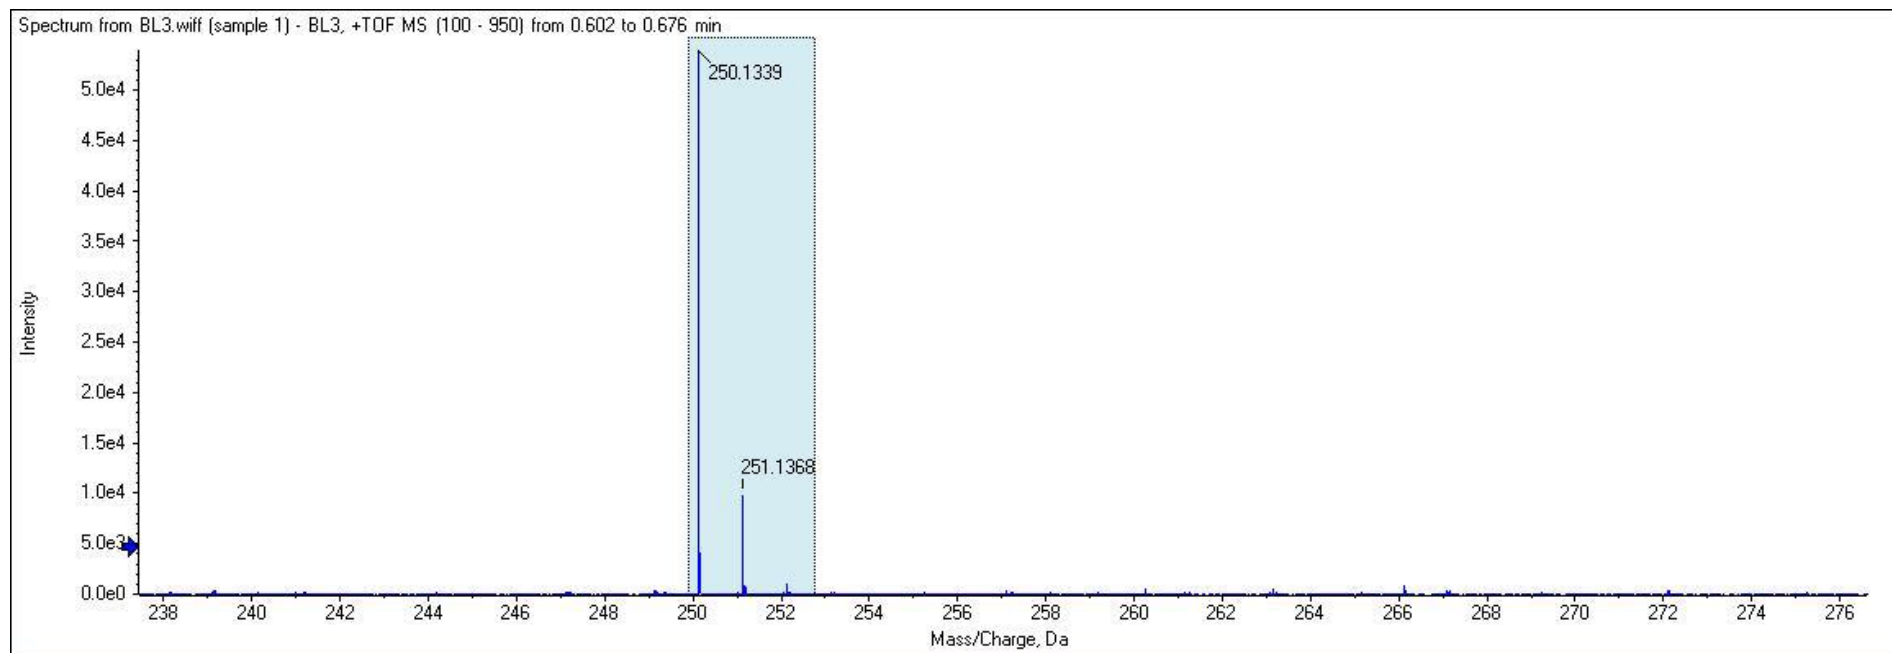

**(1-benzyl-1*H*-1,2,3-triazol-4-yl)methyl benzoate (3c)**

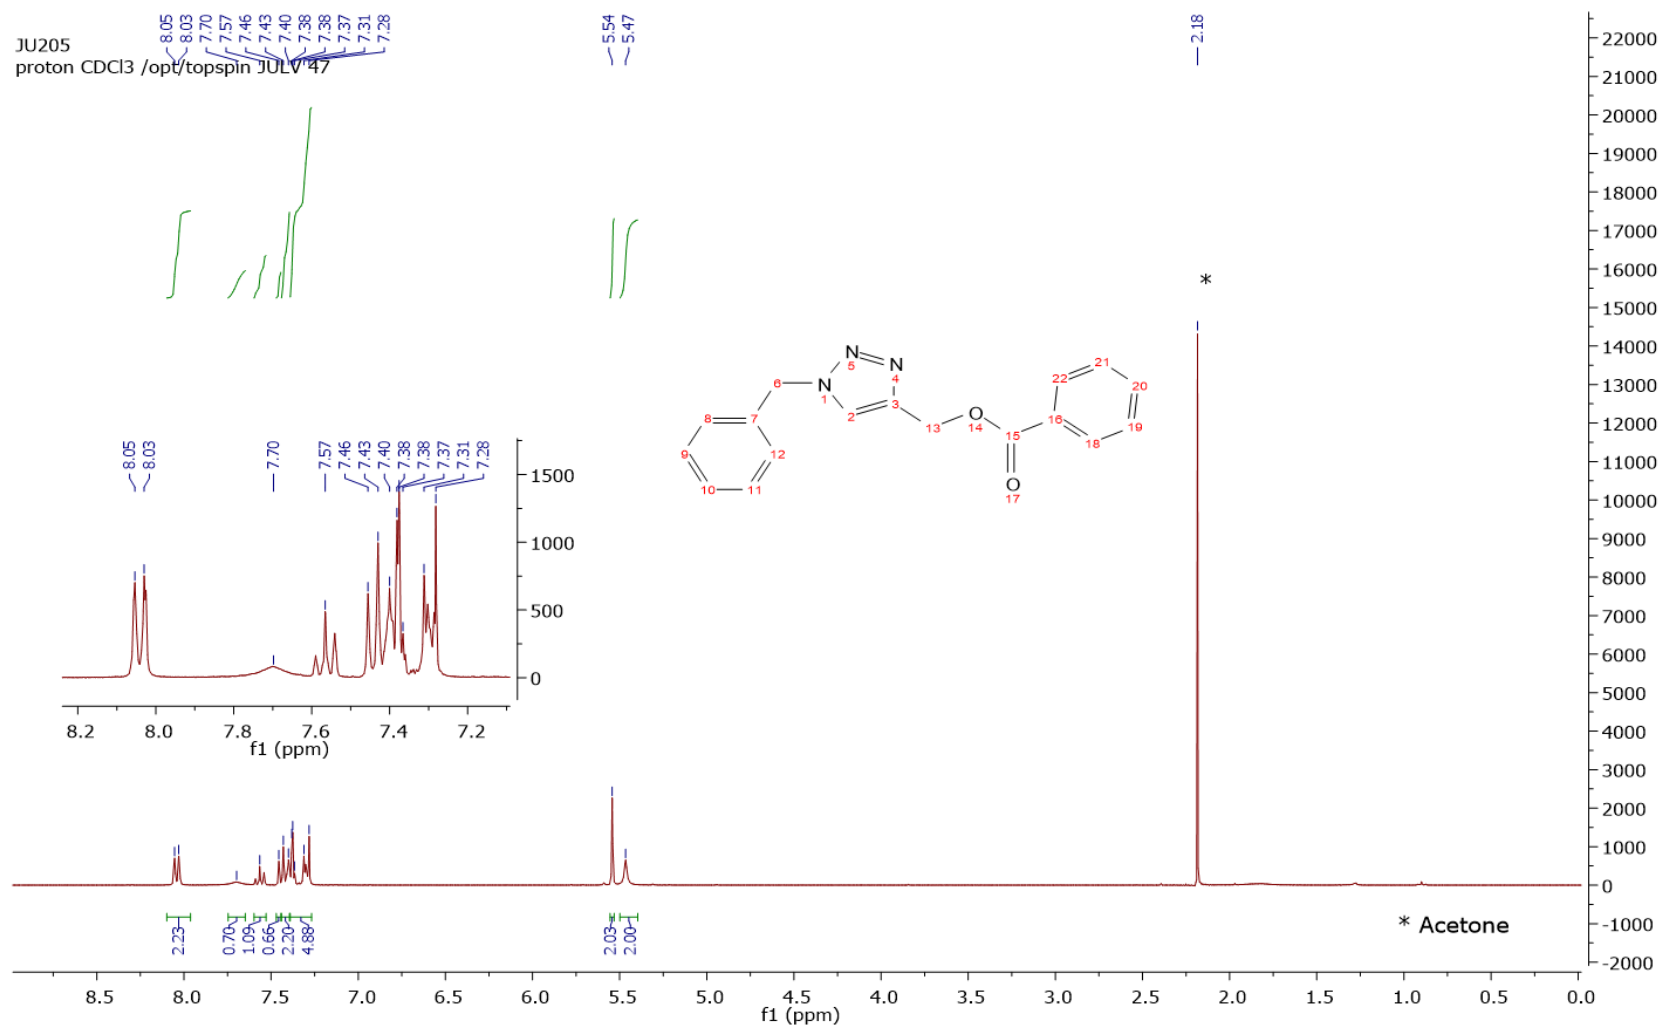

JU205  
c13cpdc CDCl3 /opt/topspin JULV 47

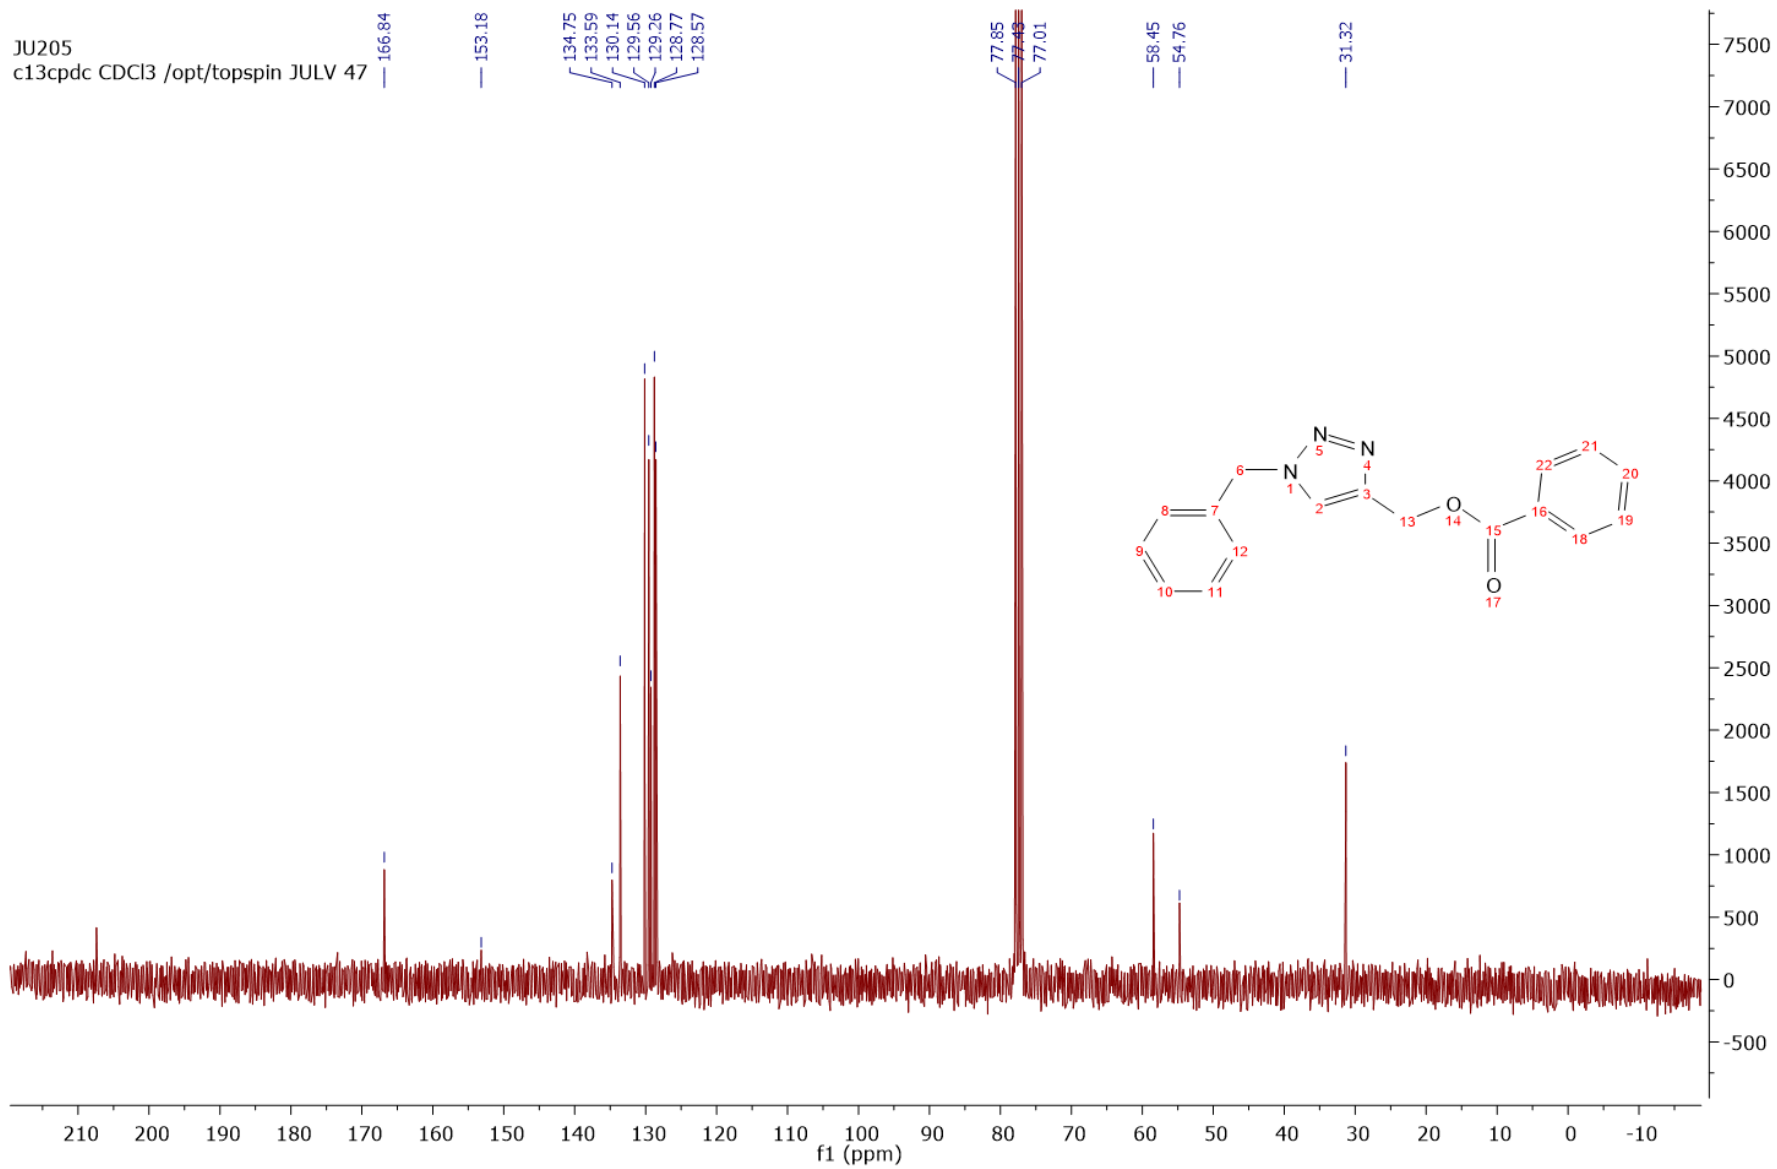



JU205  
c13dept135c CDCl3 /opt/topspin JULV 47

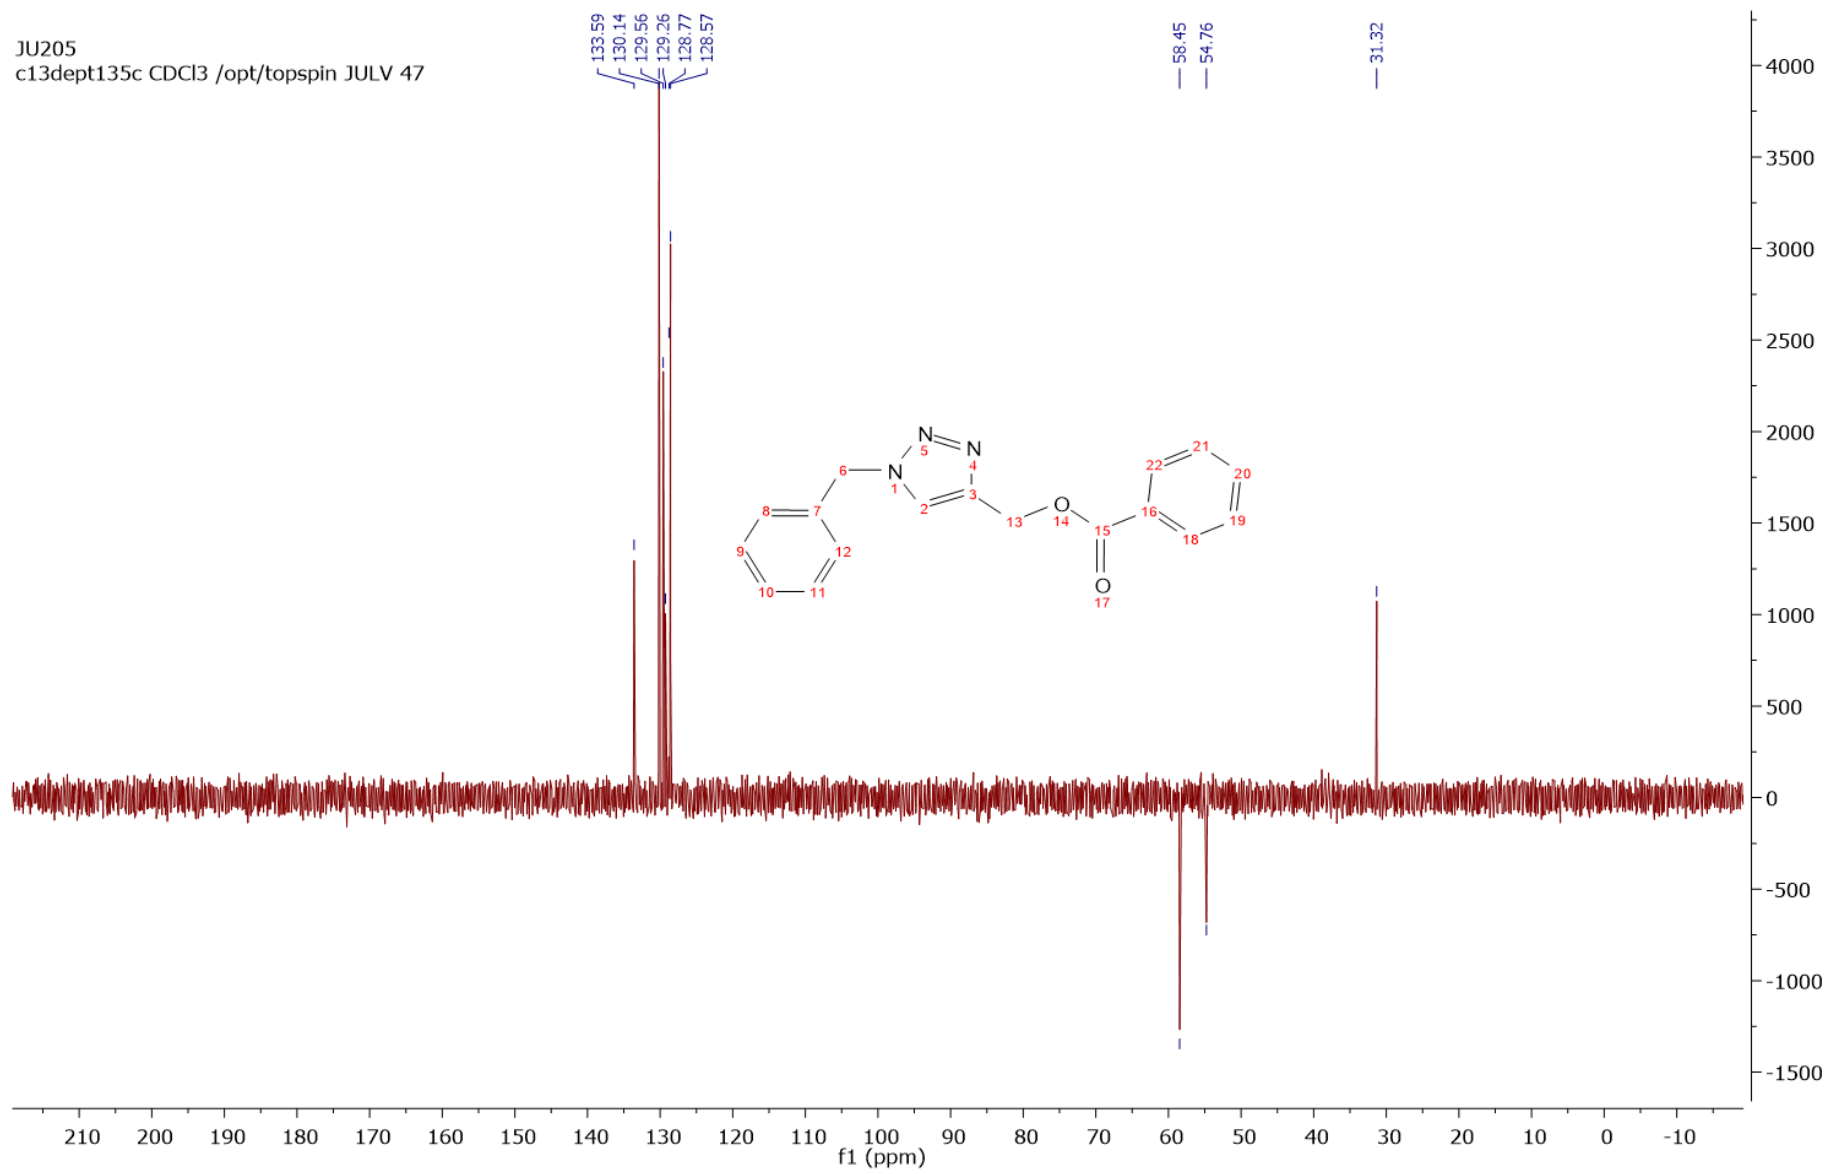

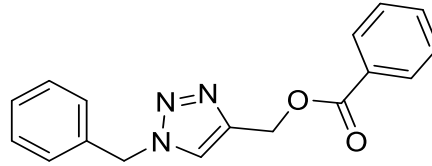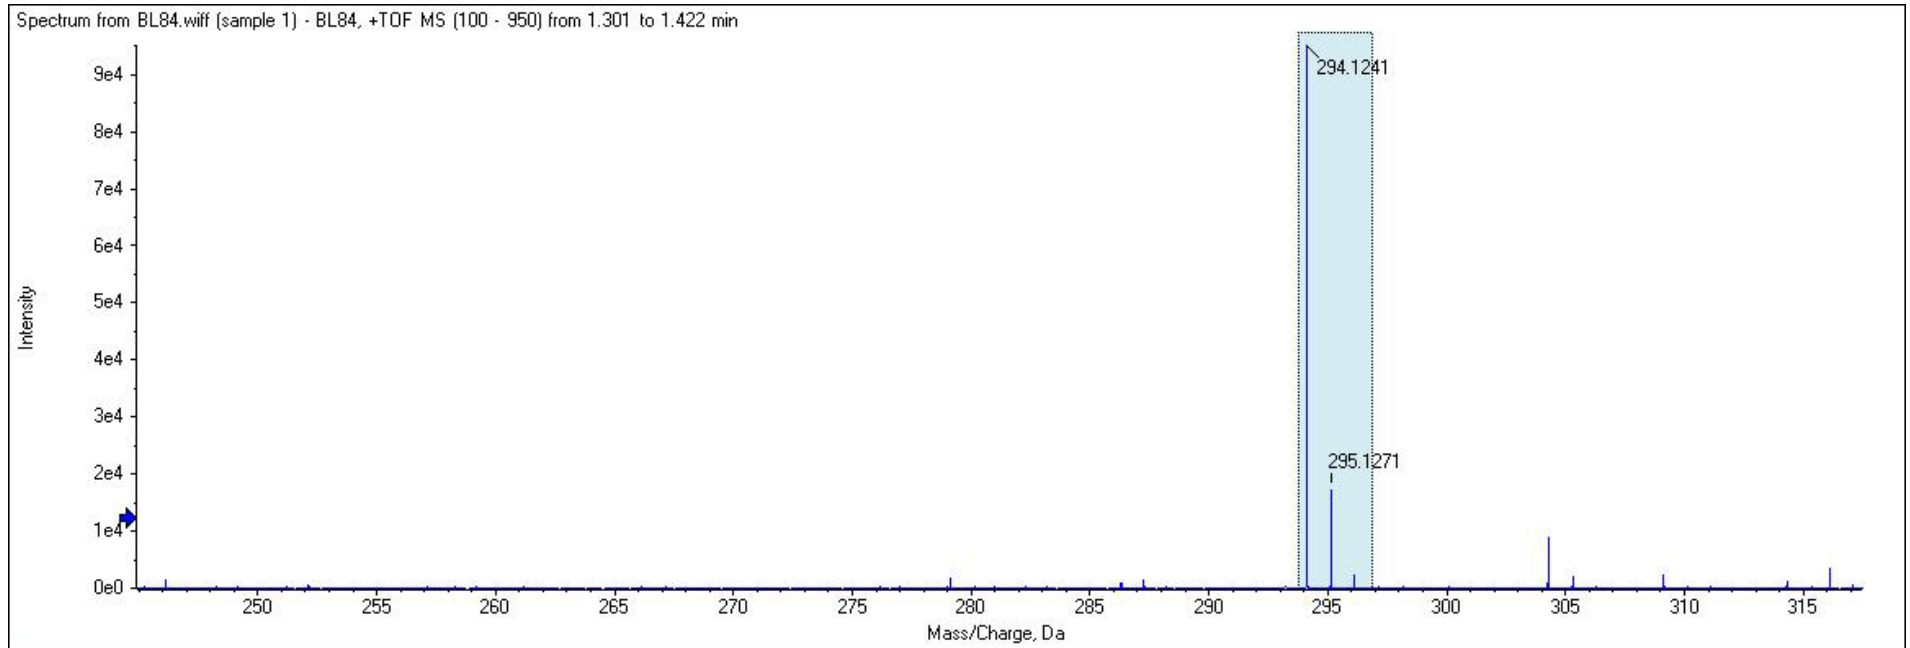

**1-benzyl-4-(phenoxyethyl)-1H-1,2,3-triazole (3d)**

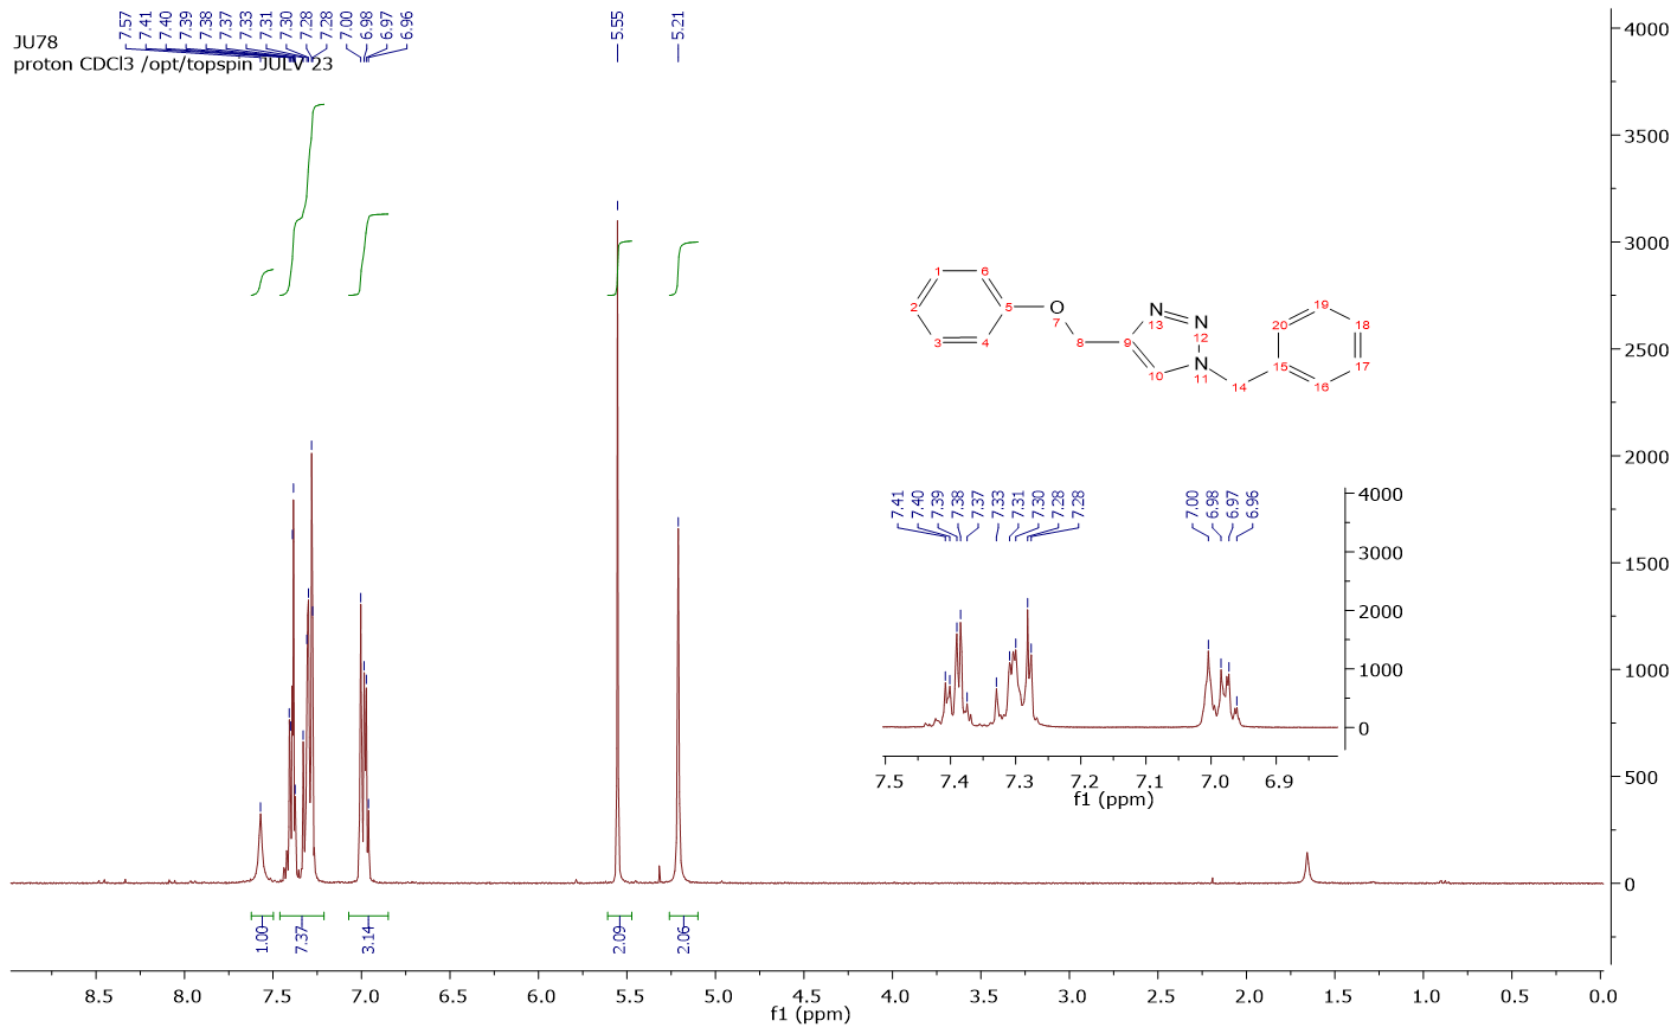

JU78  
c13cpdc CDCl3 /opt/topspin JULV 23

134.87  
129.92  
129.55  
129.22  
128.53  
121.65  
115.18

77.85  
77.42  
77.09  
62.46  
54.70

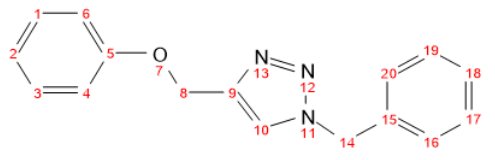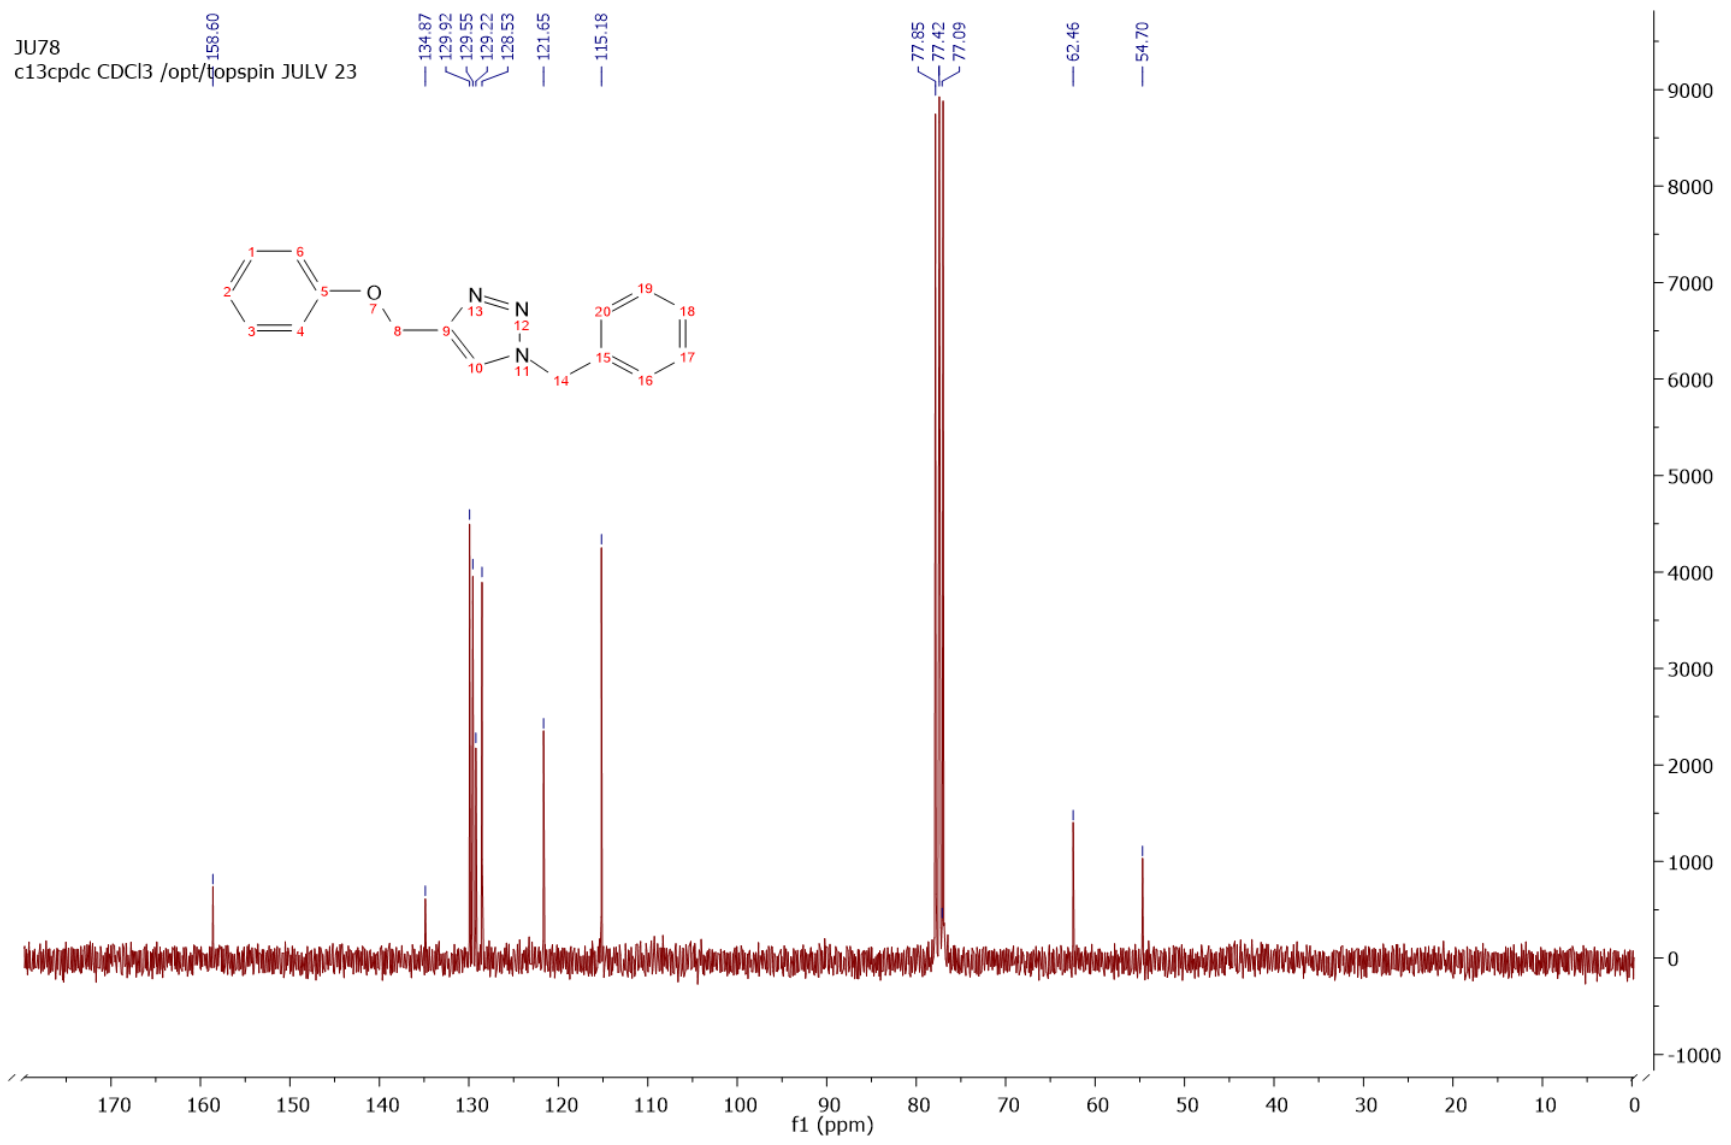

JU78  
c13dept135c CDCl3 /opt/topspin JULV 23

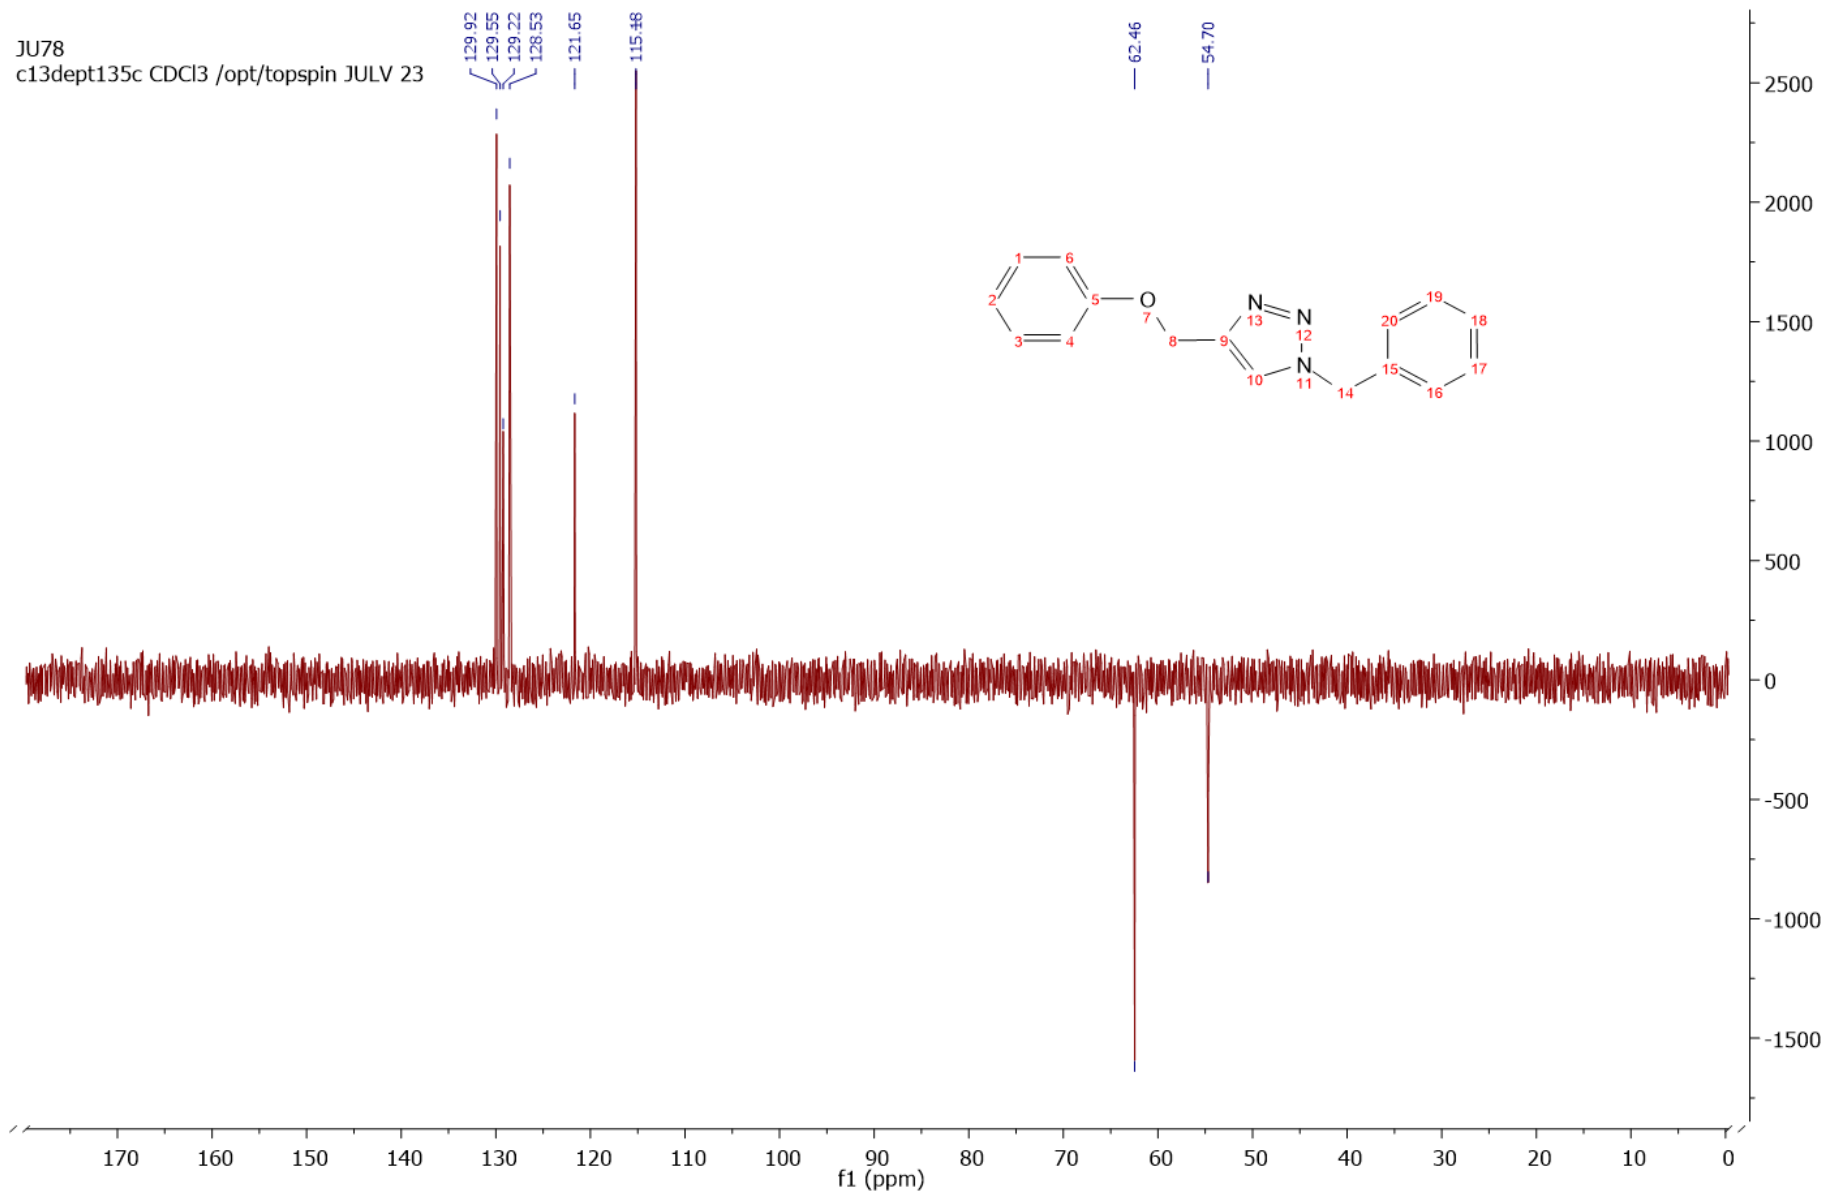

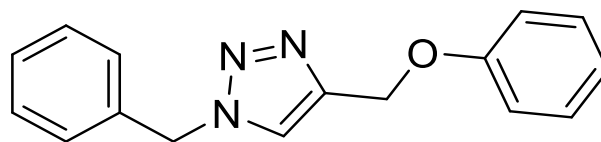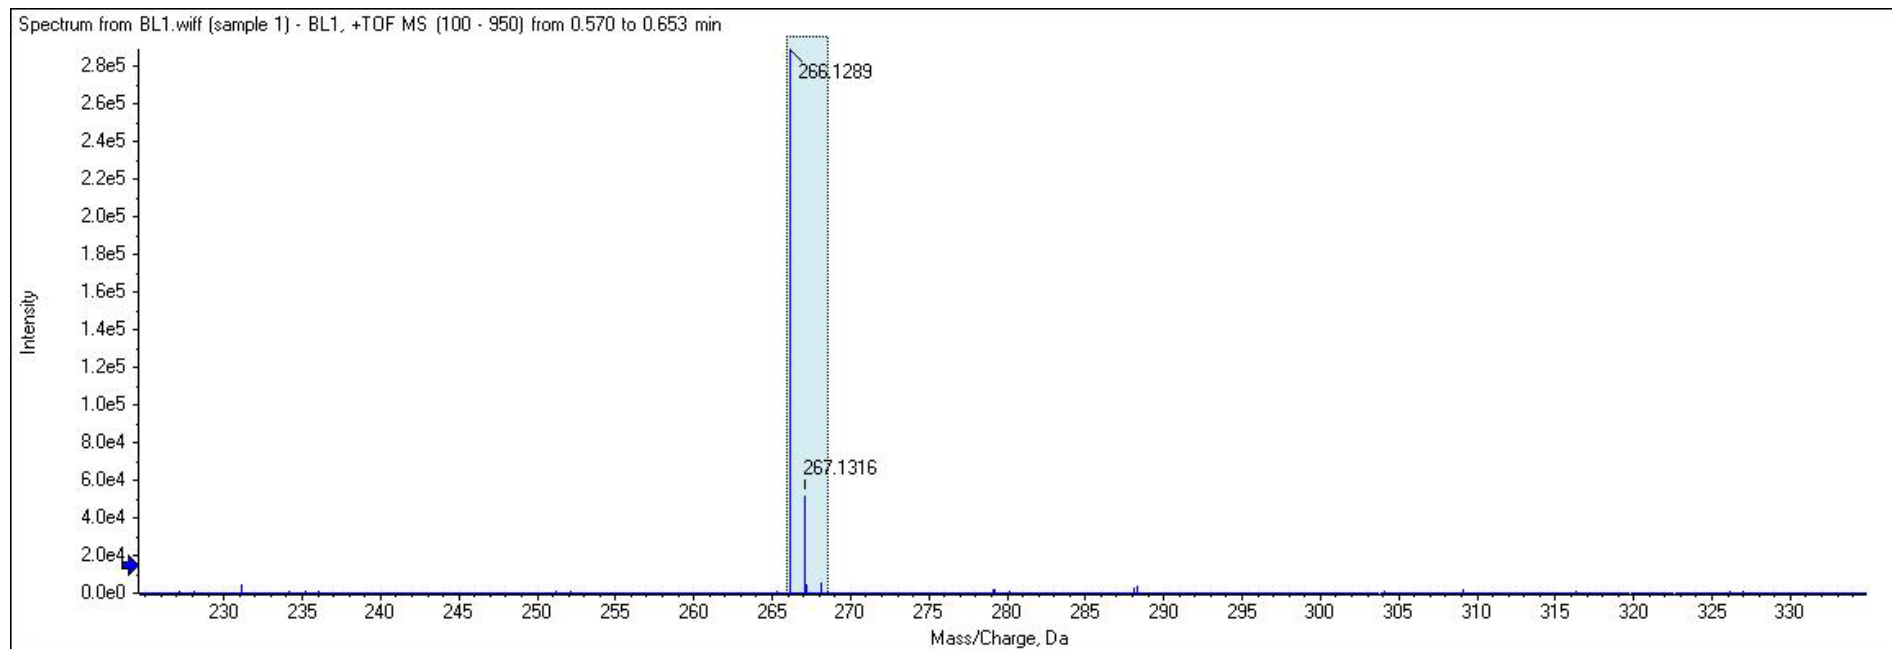

4-(1-benzyl-1H-1,2,3-triazol-4-yl)benzaldehyde (3e)

FA1103  
1H NMR  
FA1103

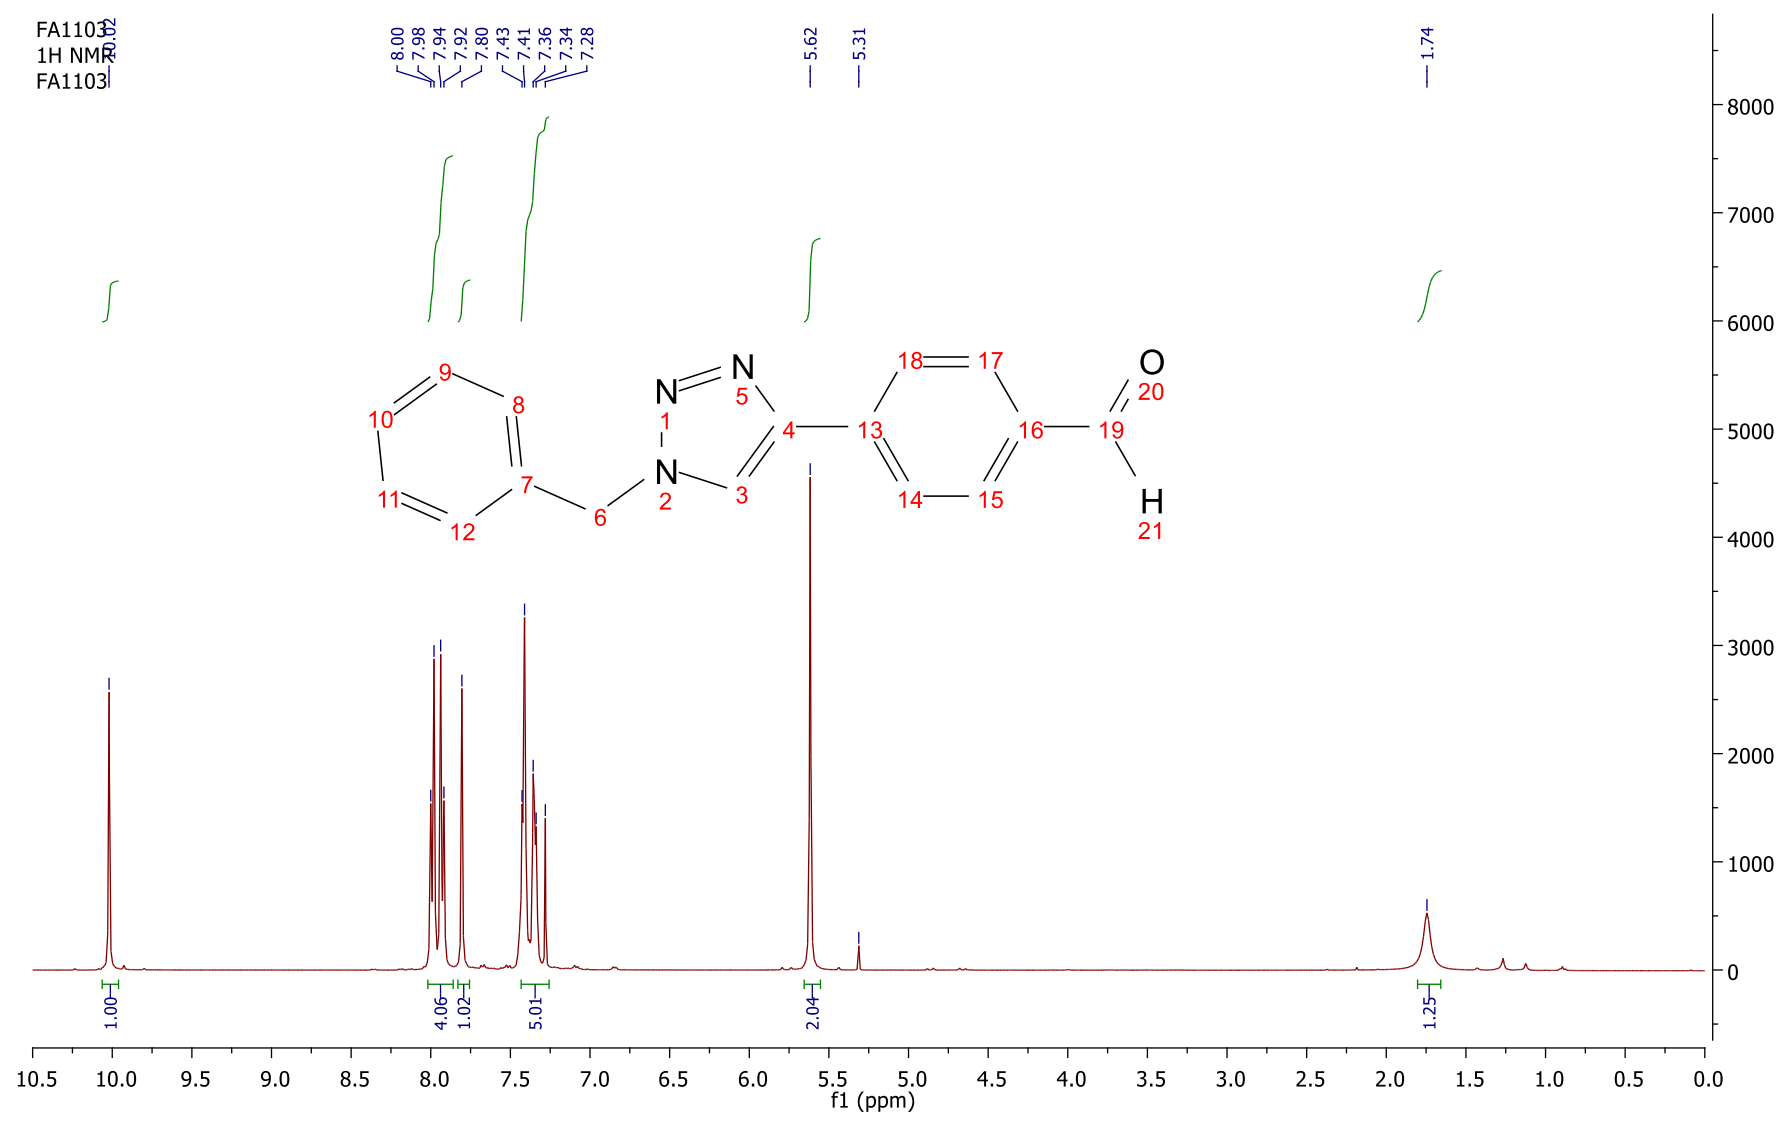

FA1103  
FA1103  
13C NMR

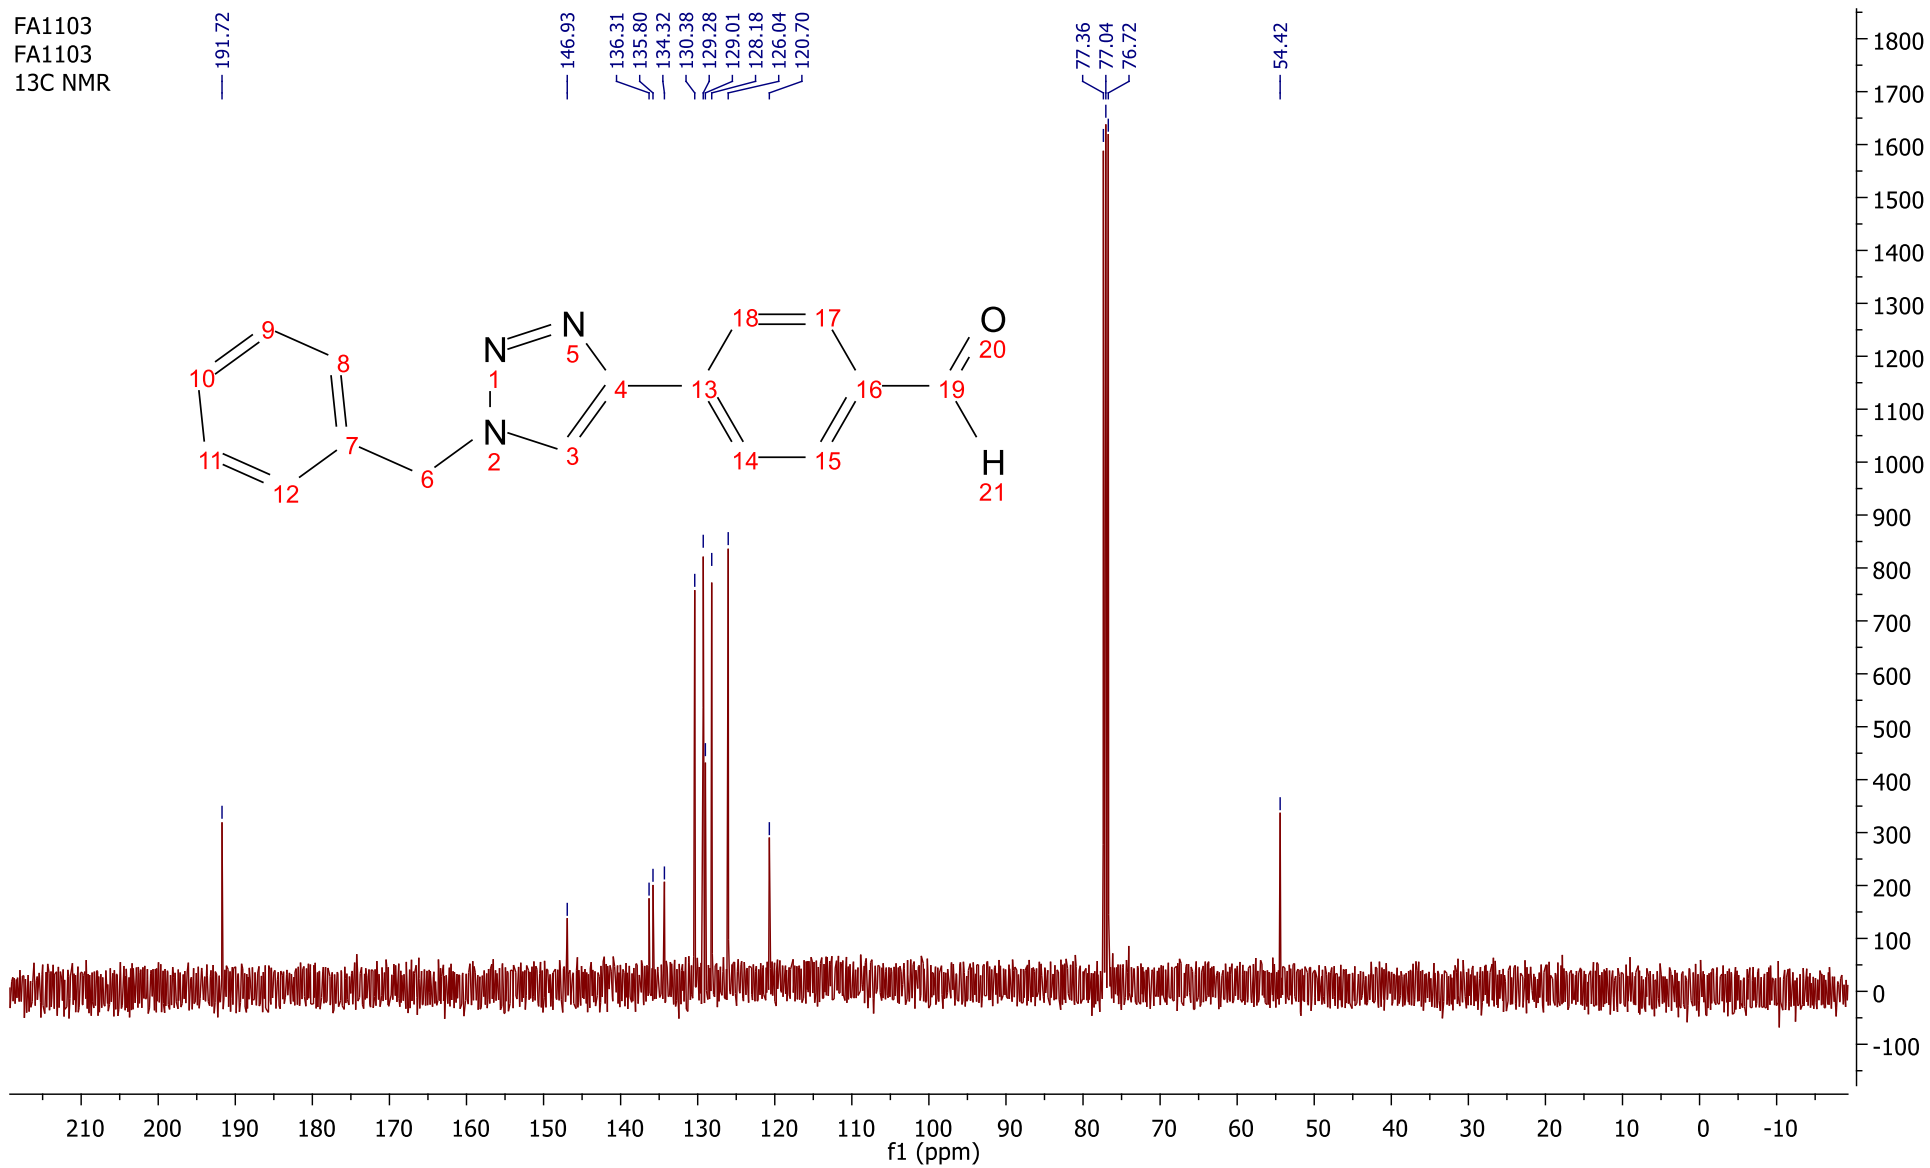



FA1099  
135Dept  
FA1099

— 191.98

130.54  
129.28  
128.18  
126.18  
120.56

— 54.42

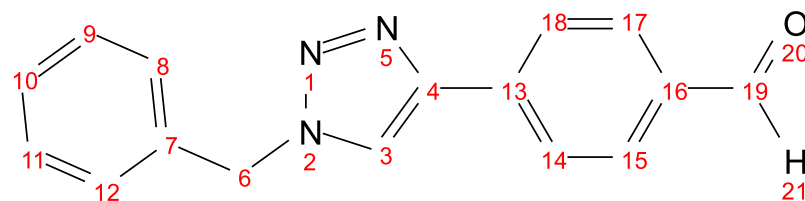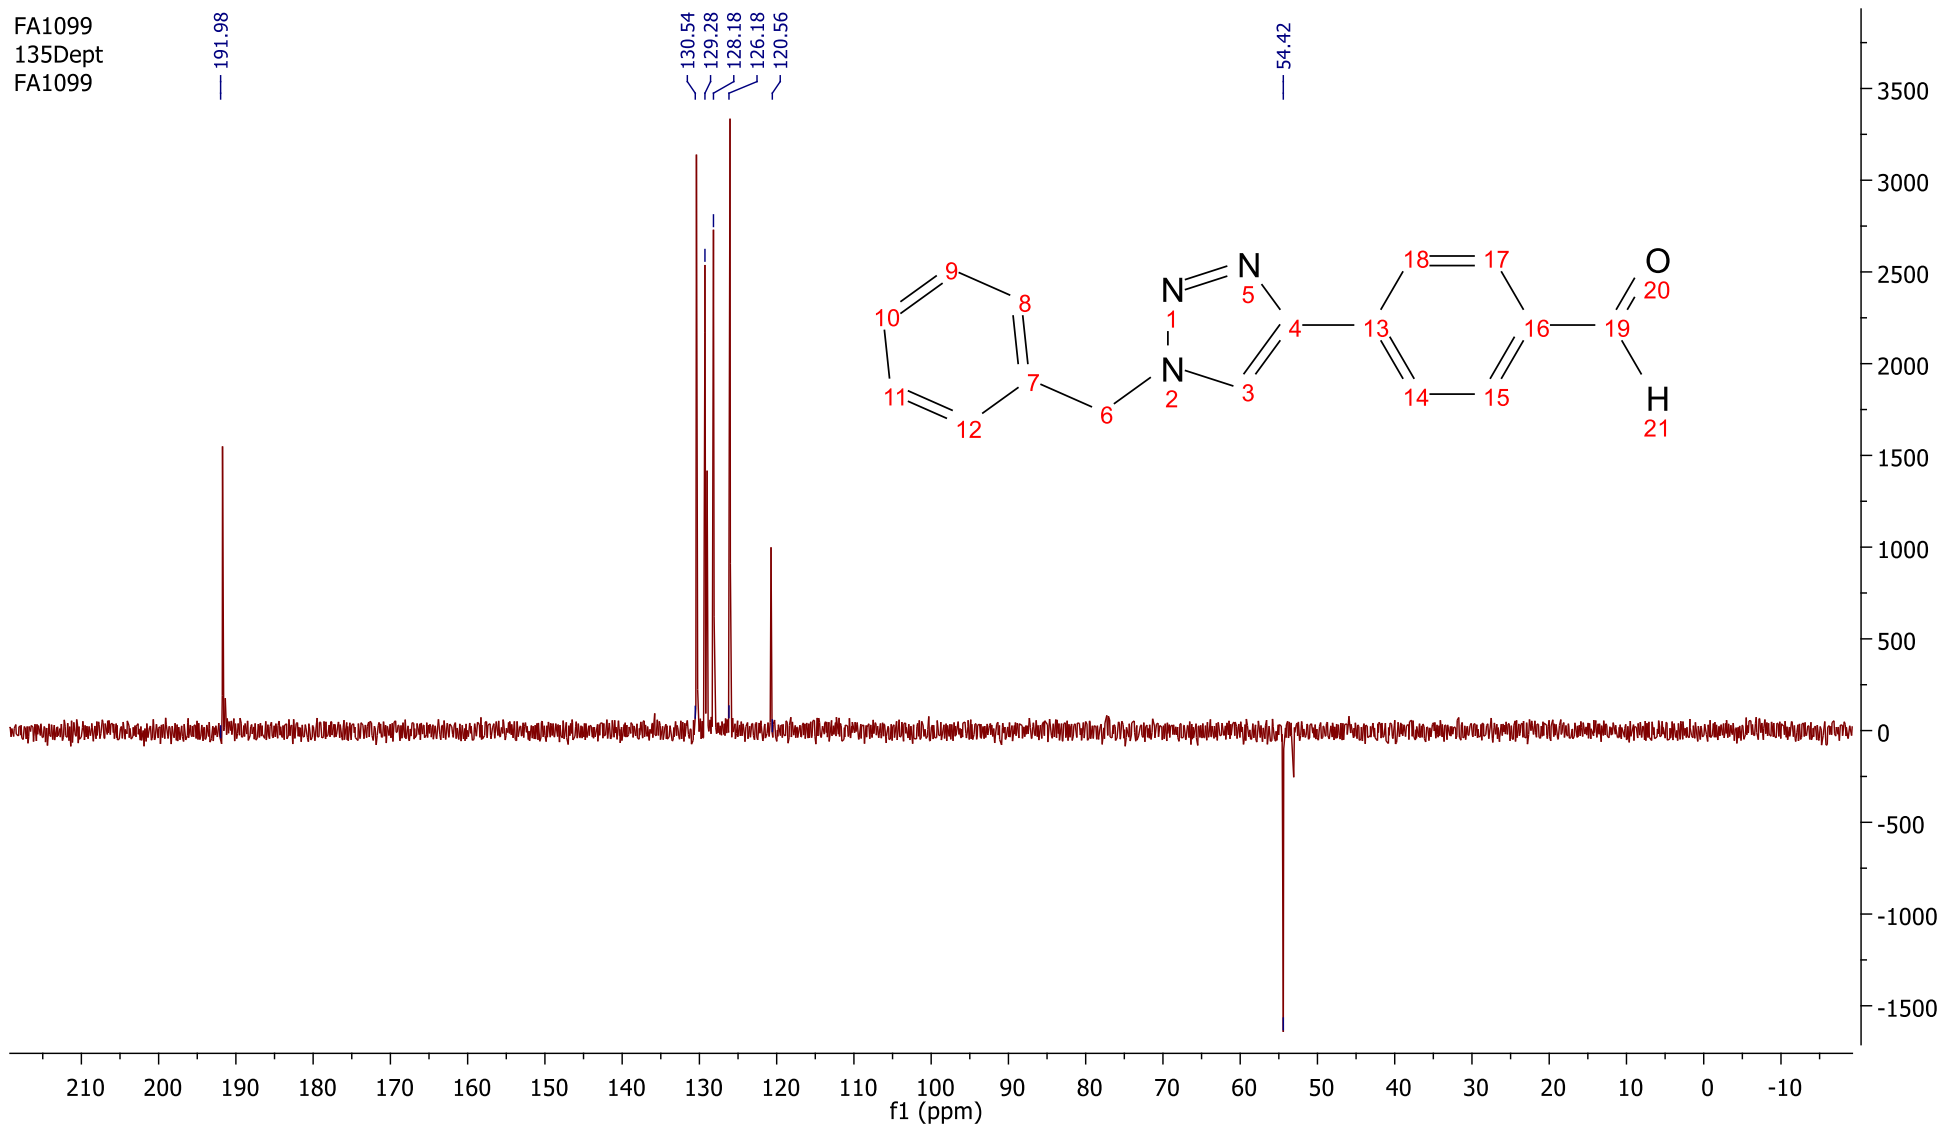

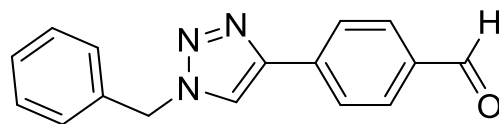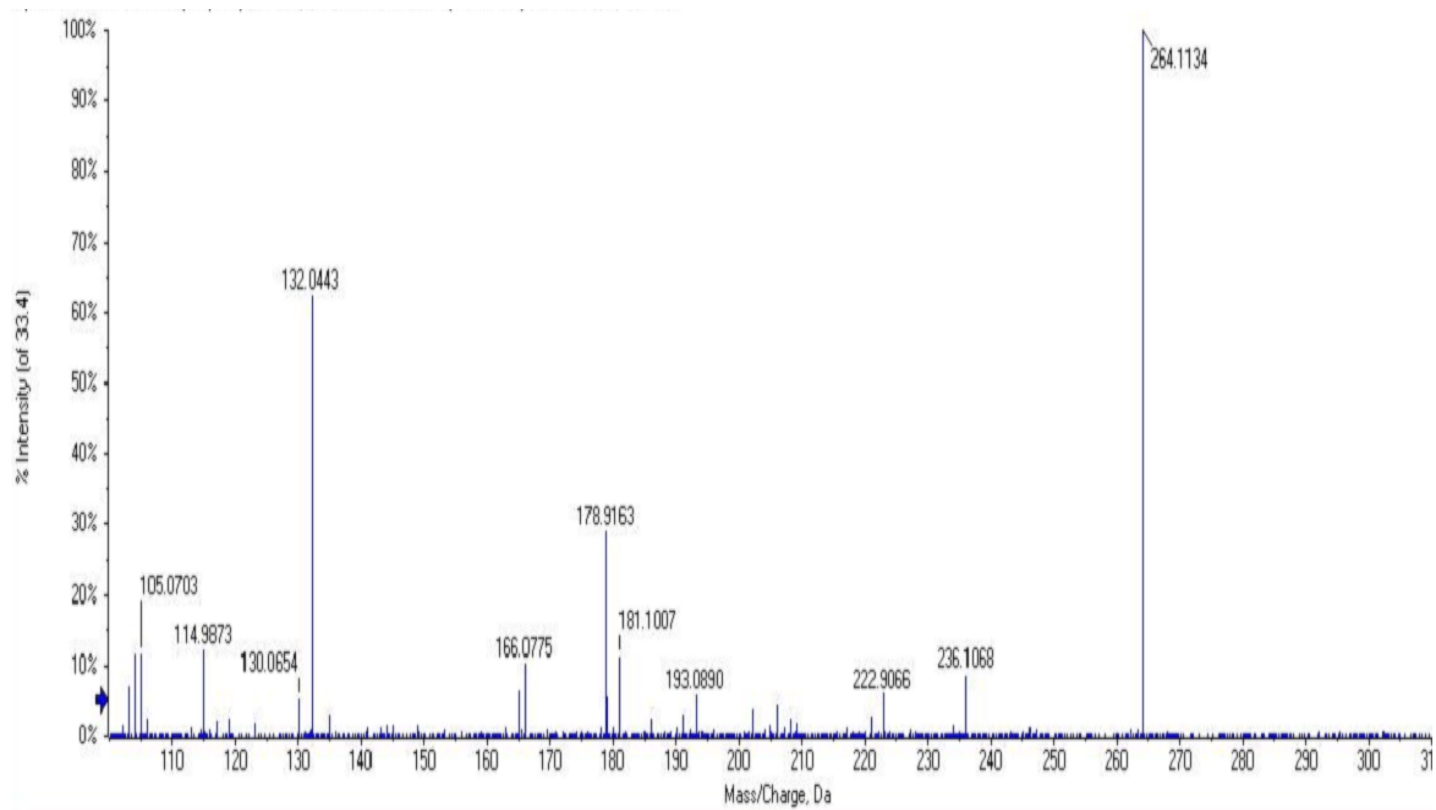

Methyl 4-(1-benzyl-1H-1,2,3-triazol-4-yl)benzoate (3f)

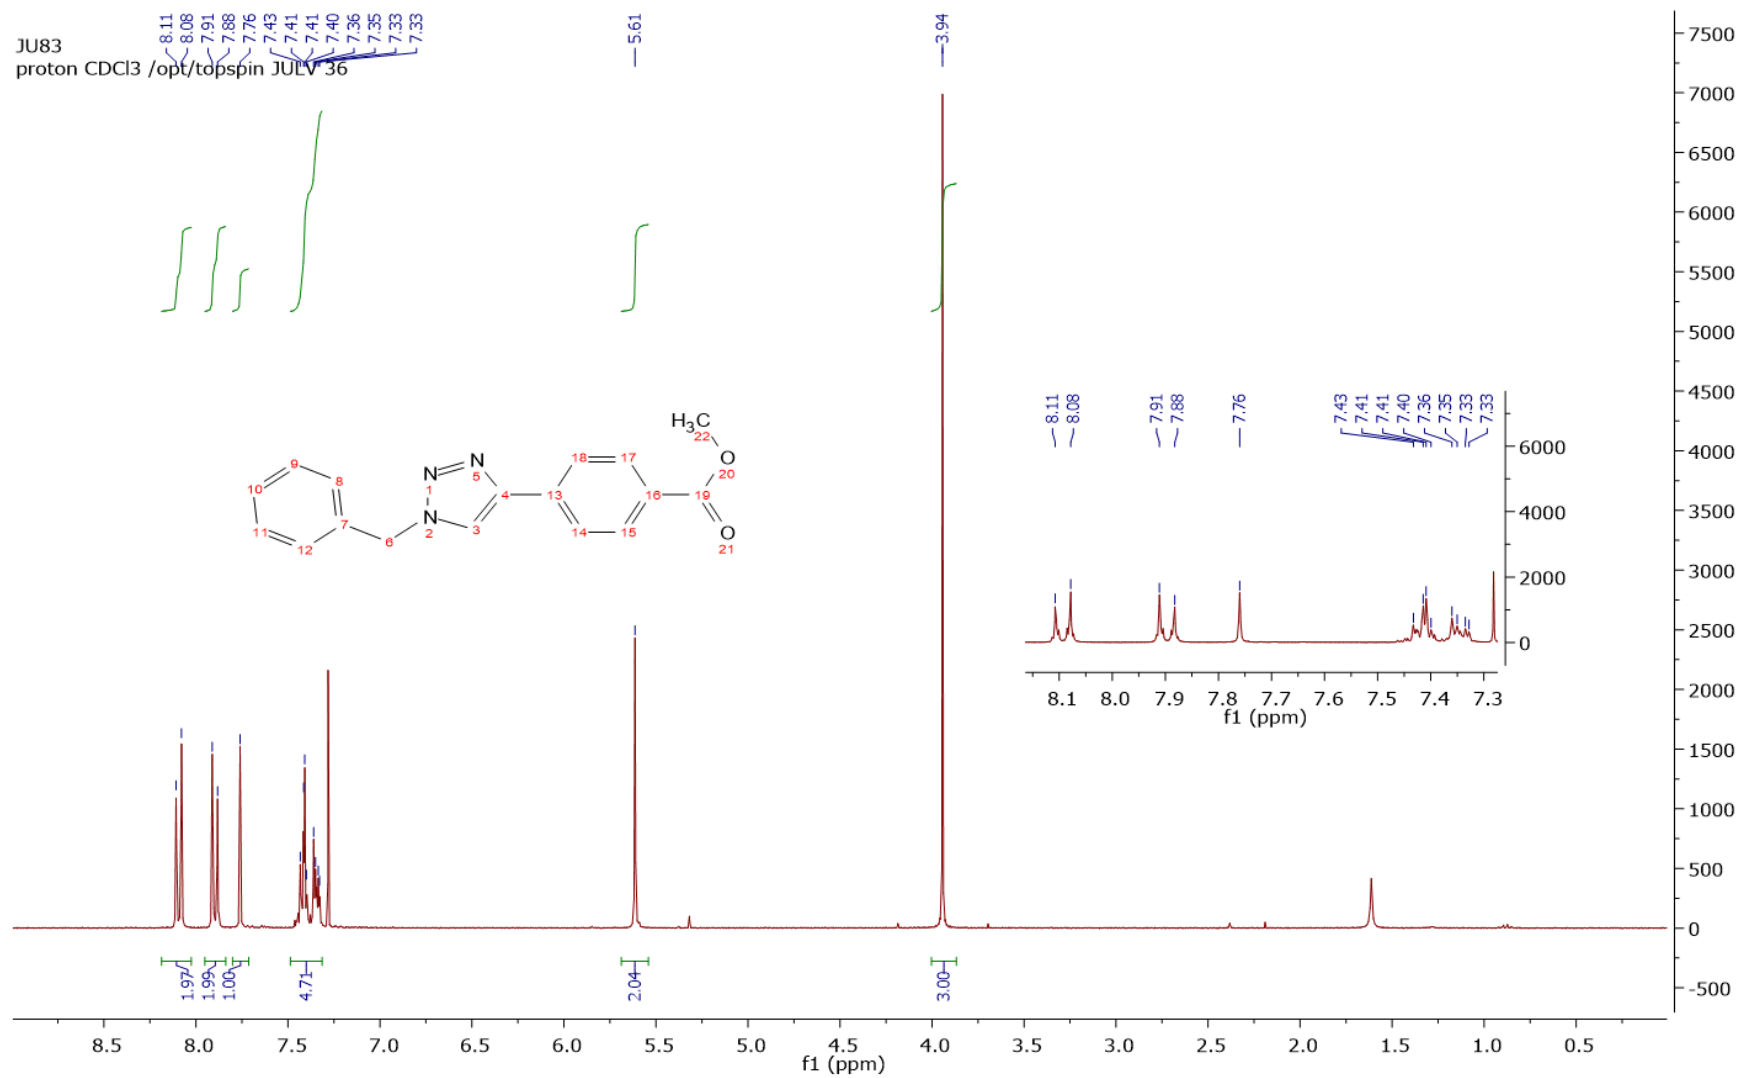

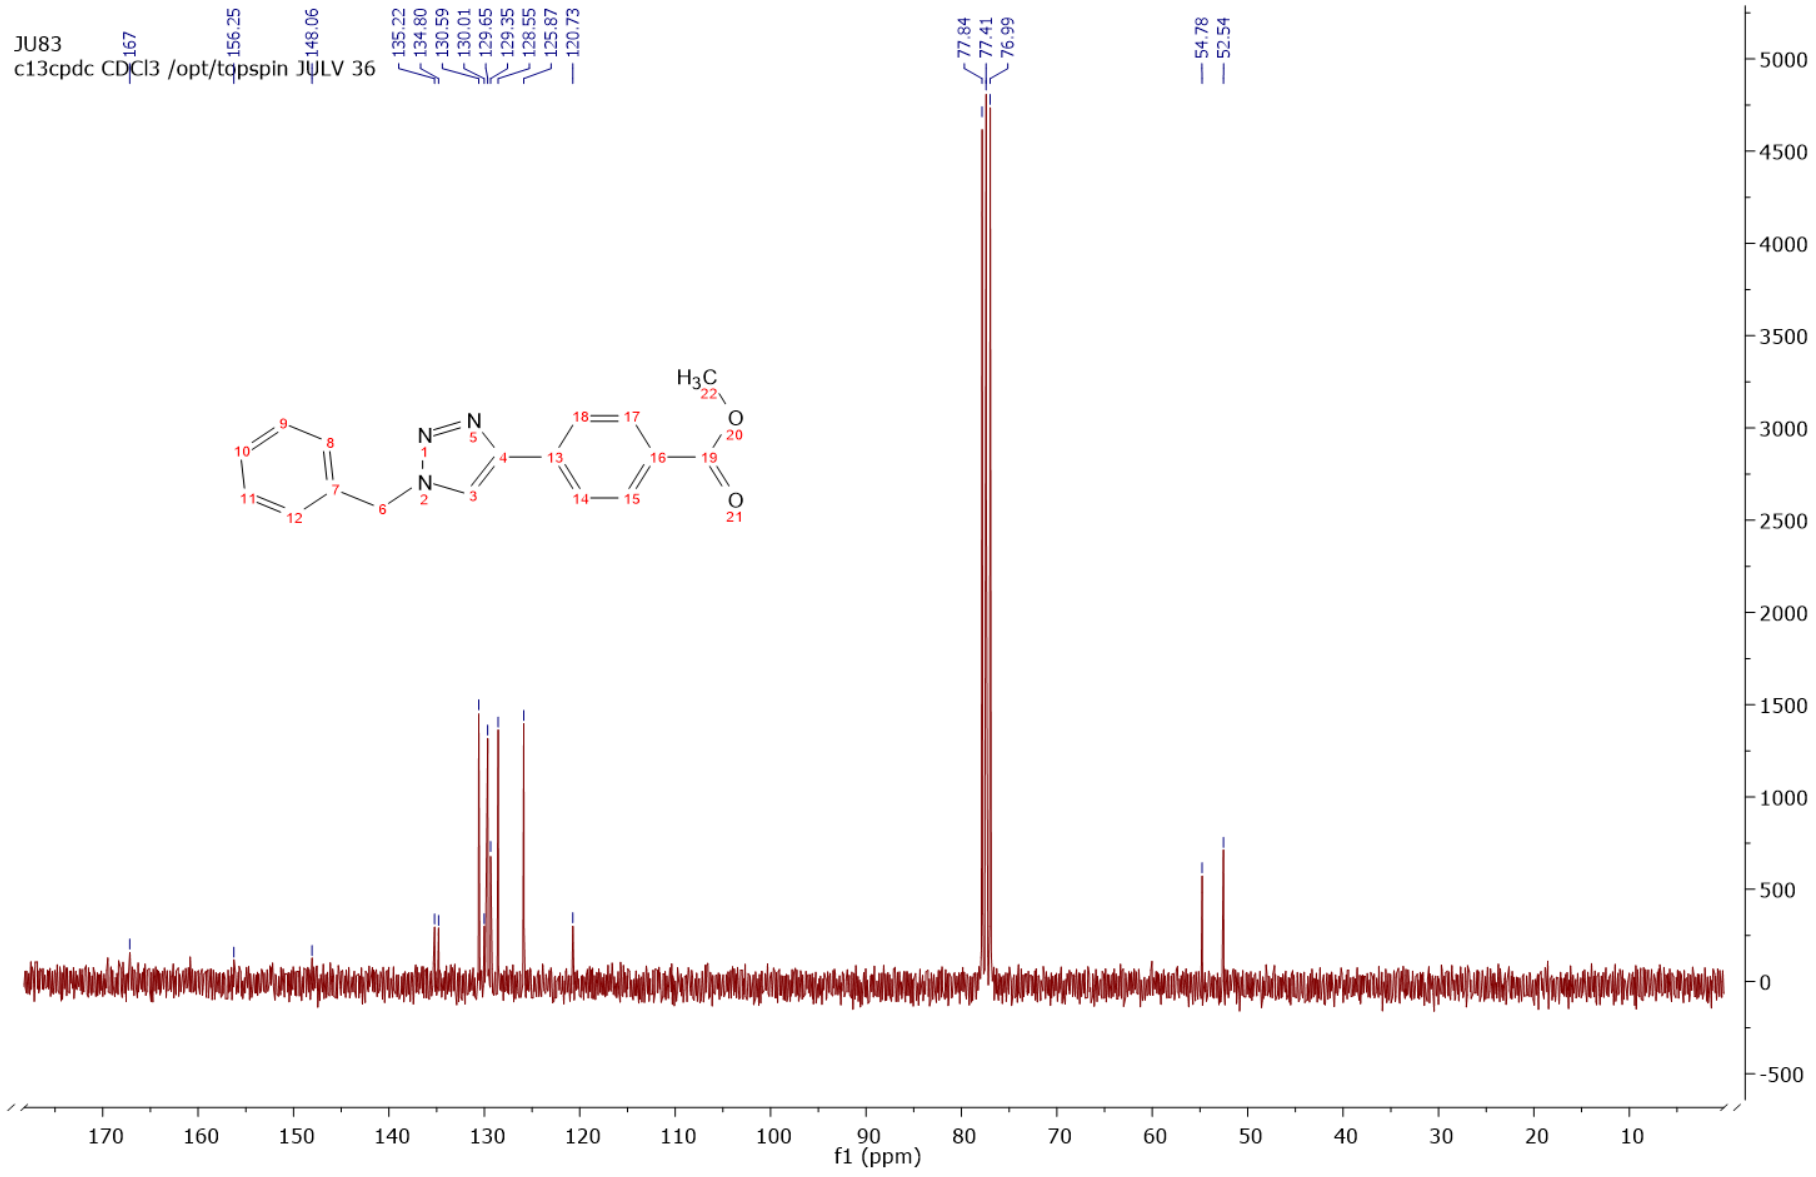

JU83  
c13dept135c CDCl3 /opt/topspin

130.59  
129.65  
129.35  
128.55  
125.87  
120.72

54.78  
52.54

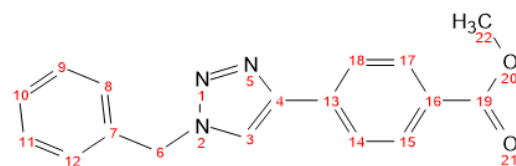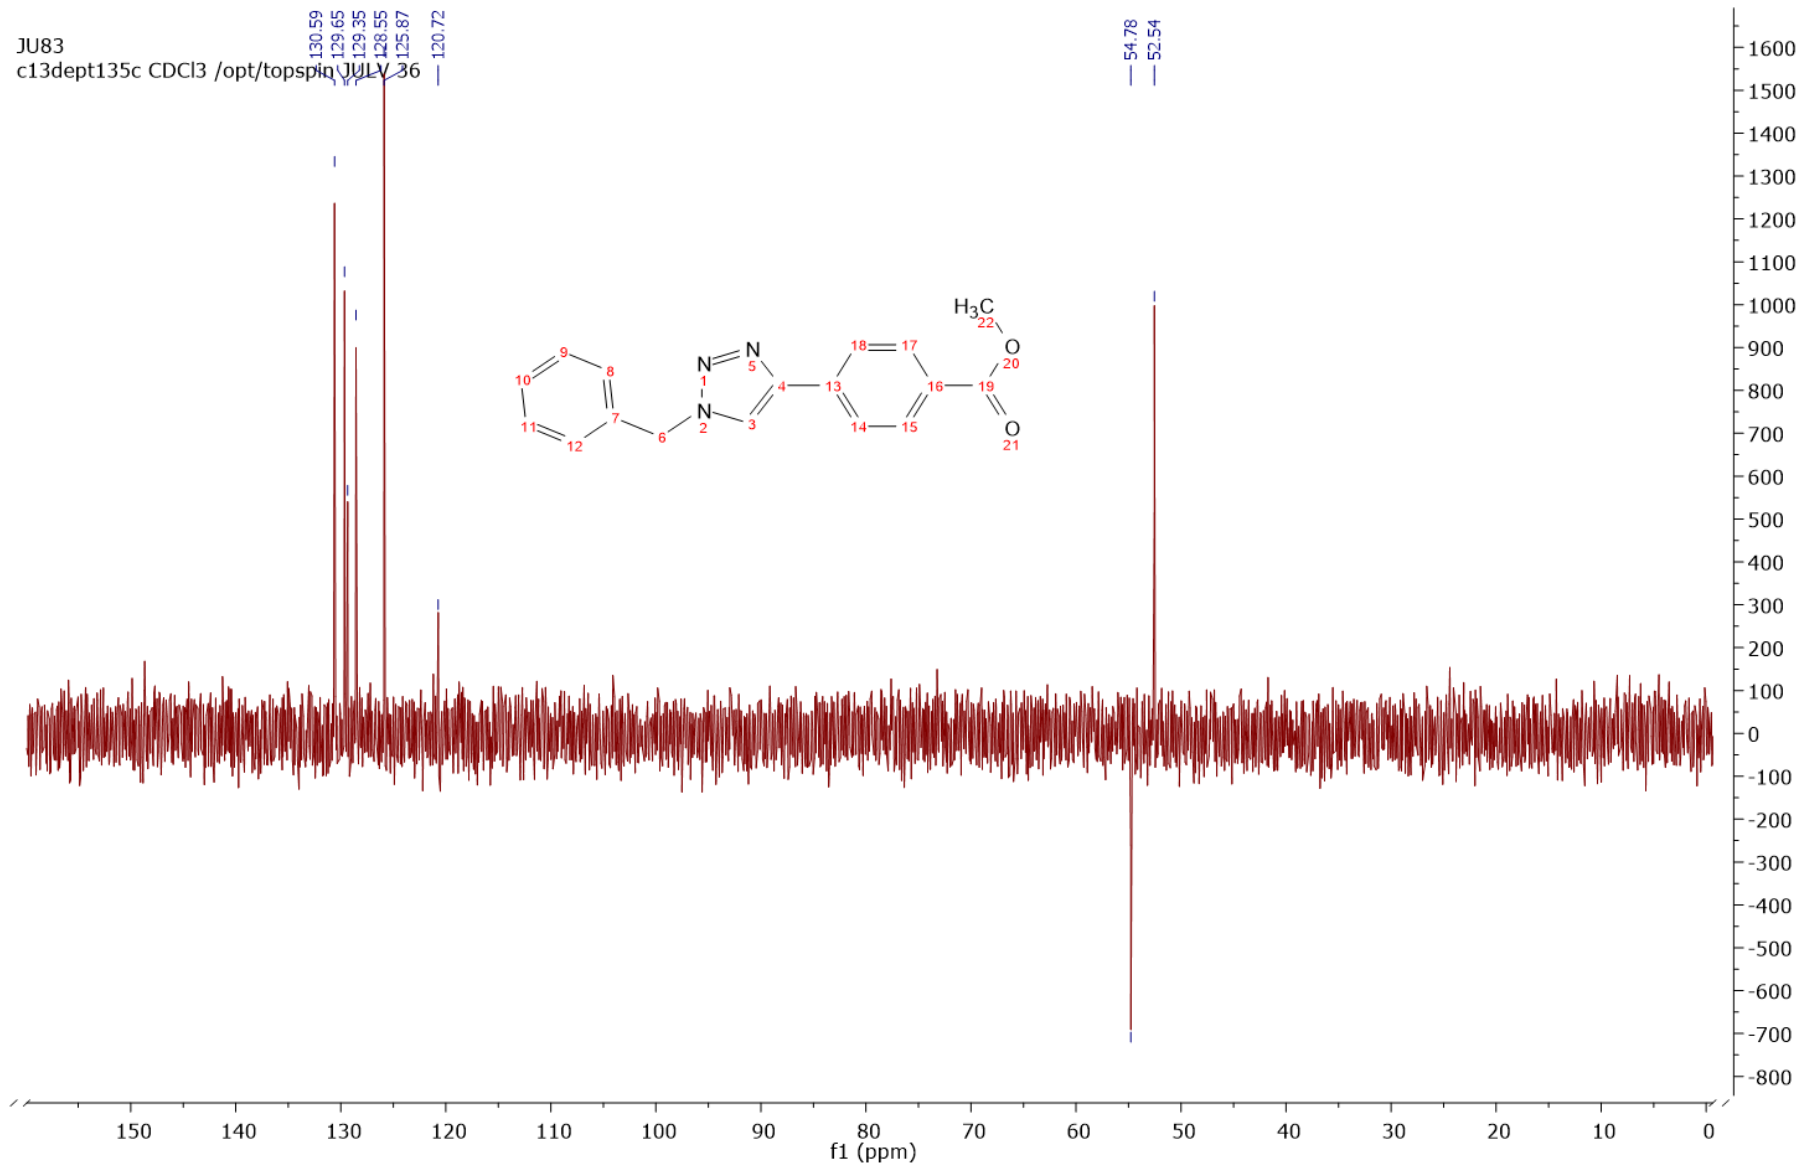

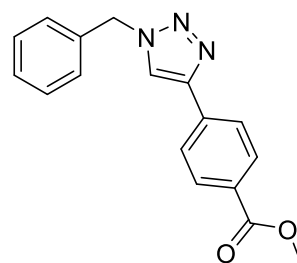

Spectrum from BL6.wiff (sample 1) - BL6, +TOF MS (100 - 950) from 0.551 to 0.597 min

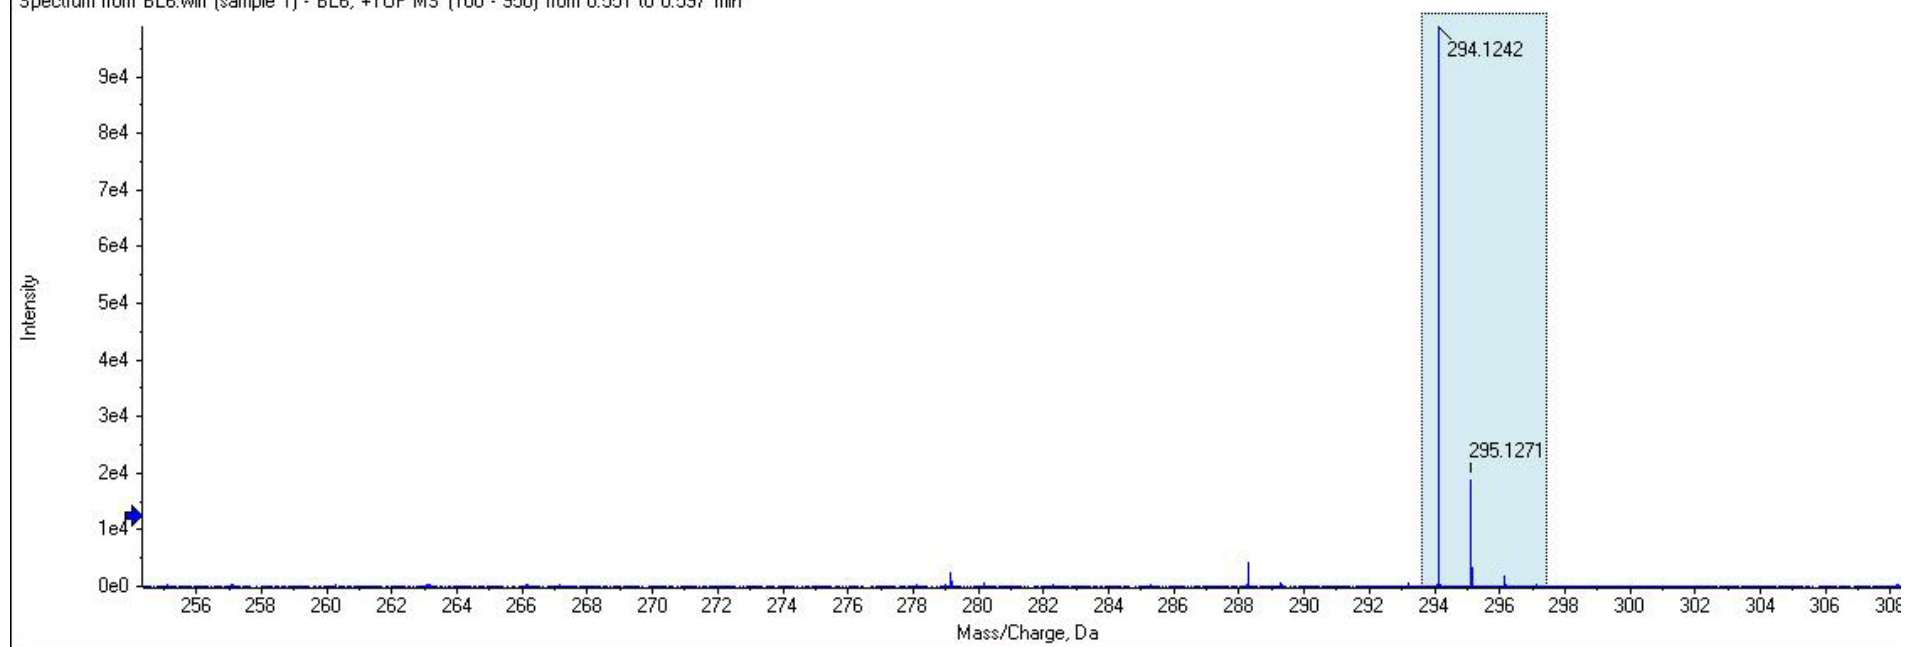

Ethyl 1-phenyl-1*H*-1,2,3-triazole-4-carboxylate (3g)

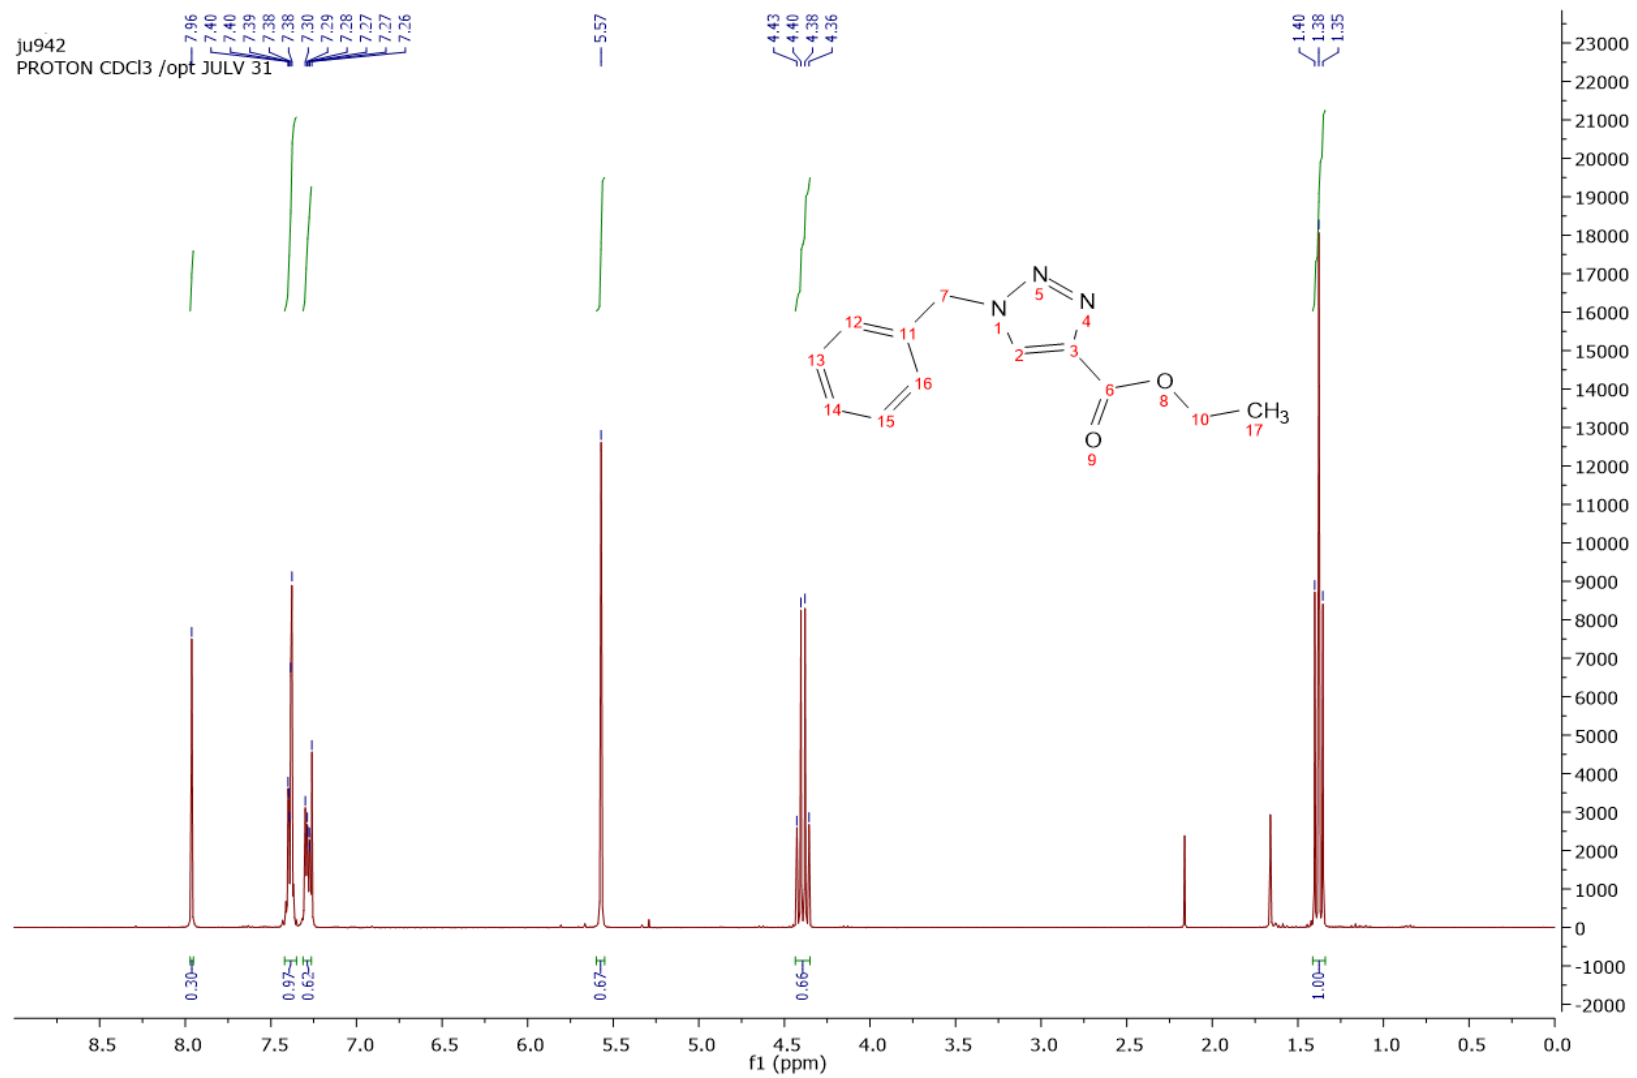

ju942  
c13cpdc CDCl3 /opt JULV 31

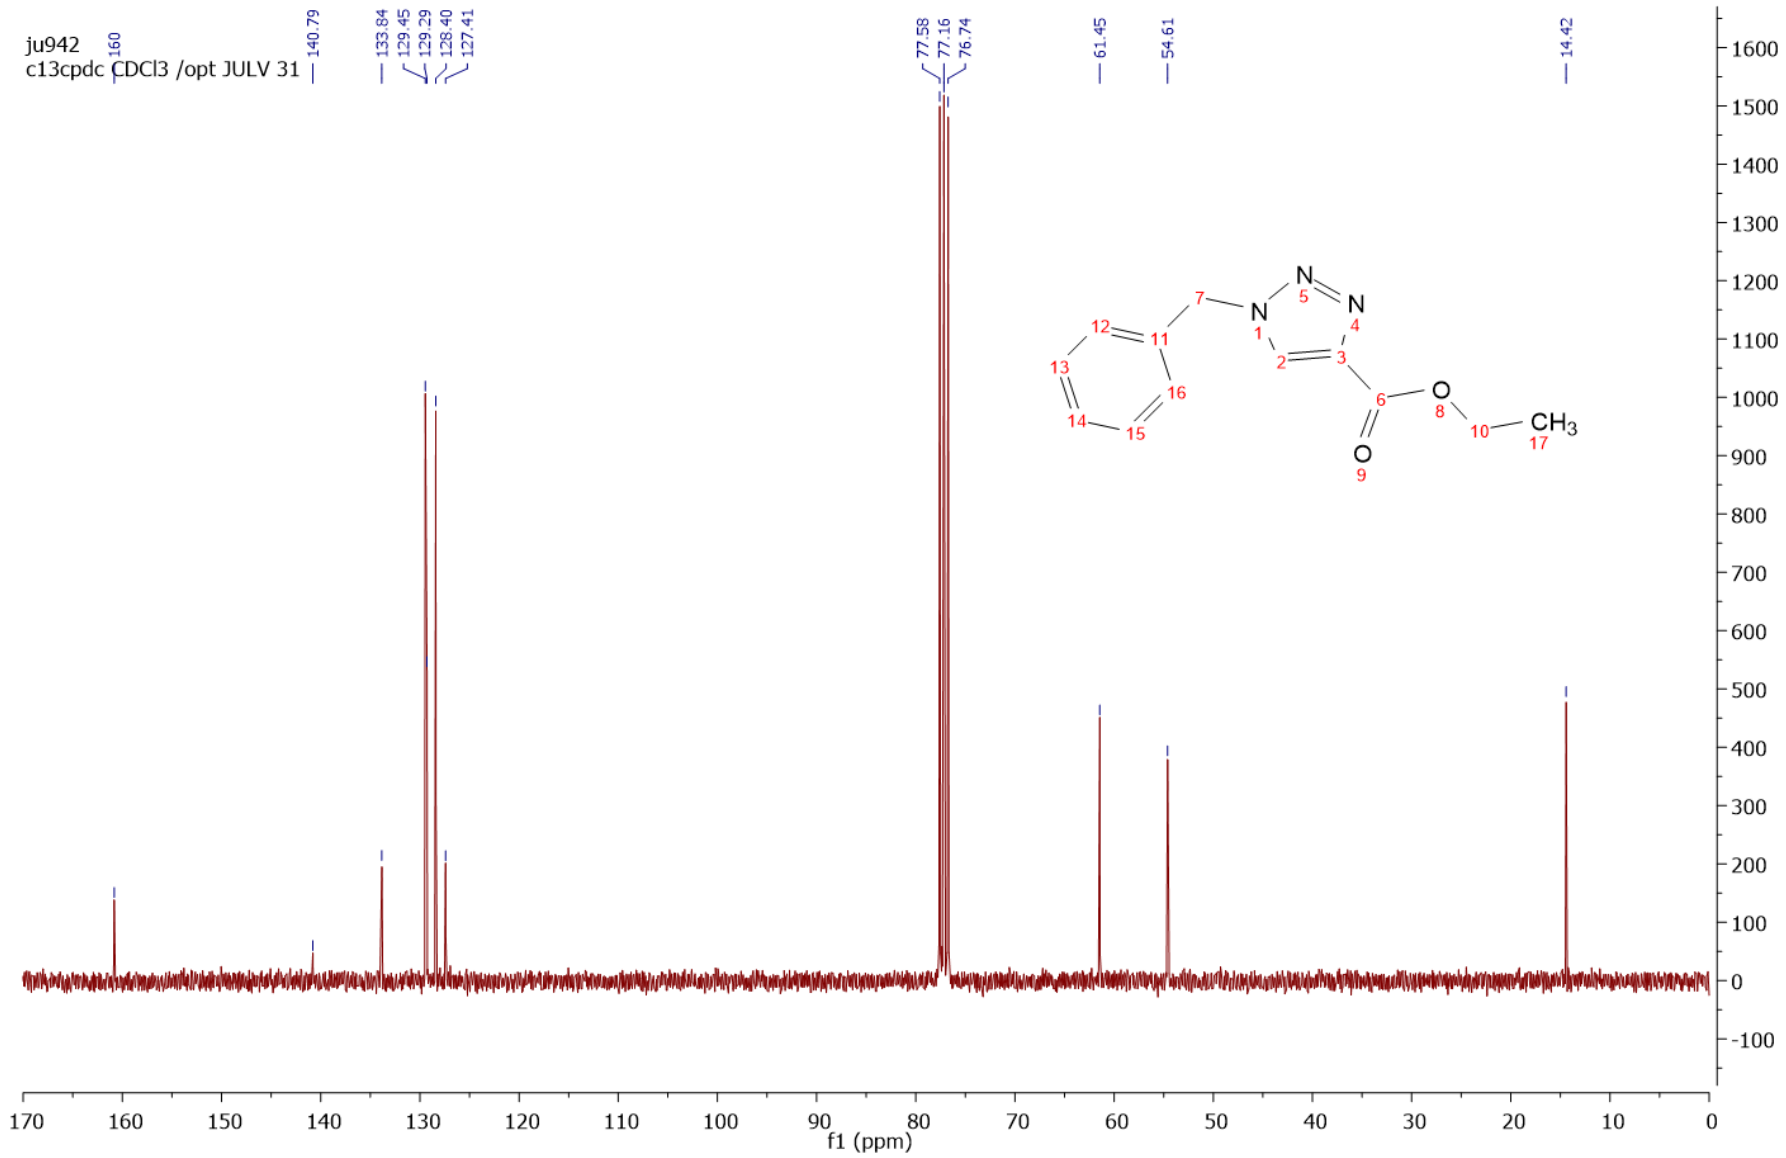



ju942  
c13dept135c CDCl3 /opt JULEV 31

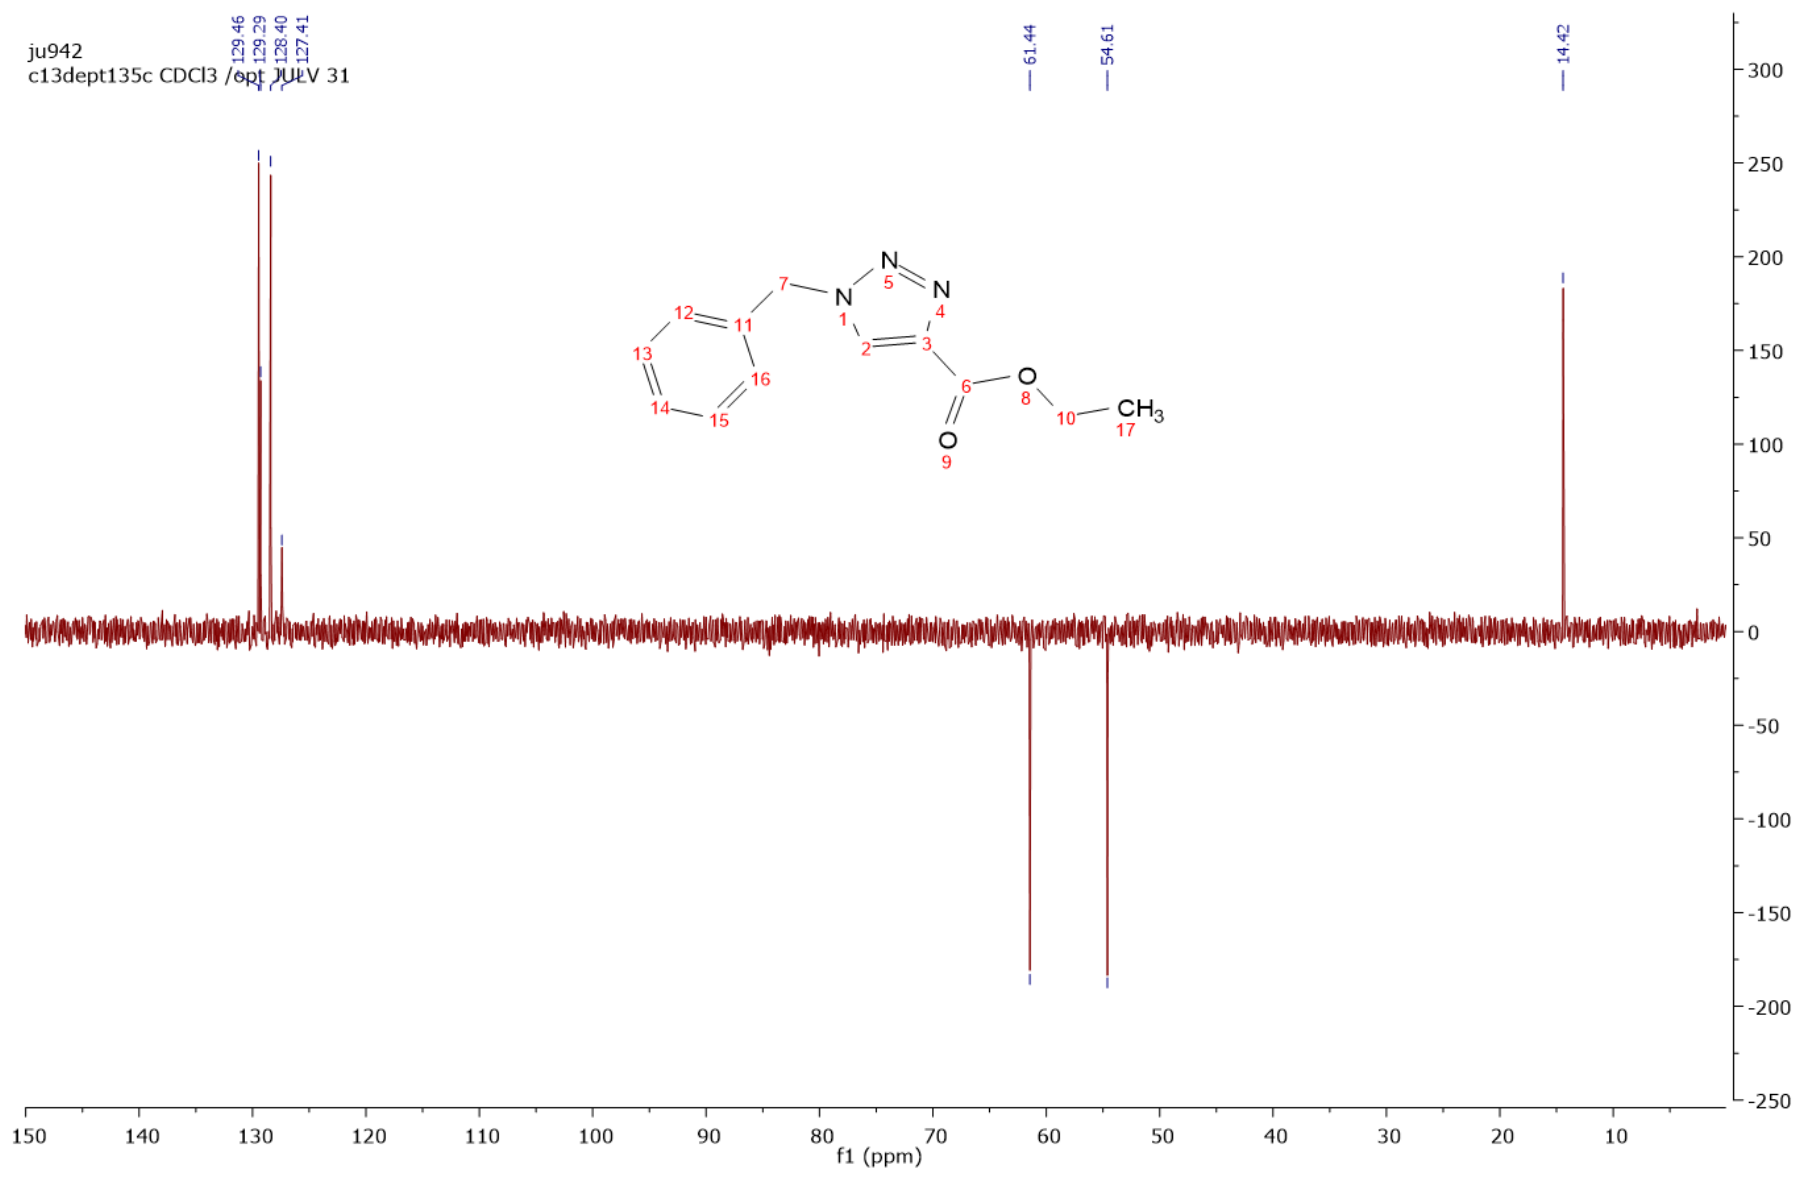

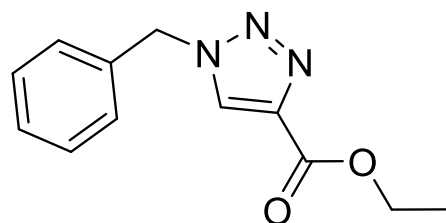

Spectrum from AN-14.wiff (sample 1) - AN-14, +TOF MS (100 - 950) from 0.363 to 0.377 min

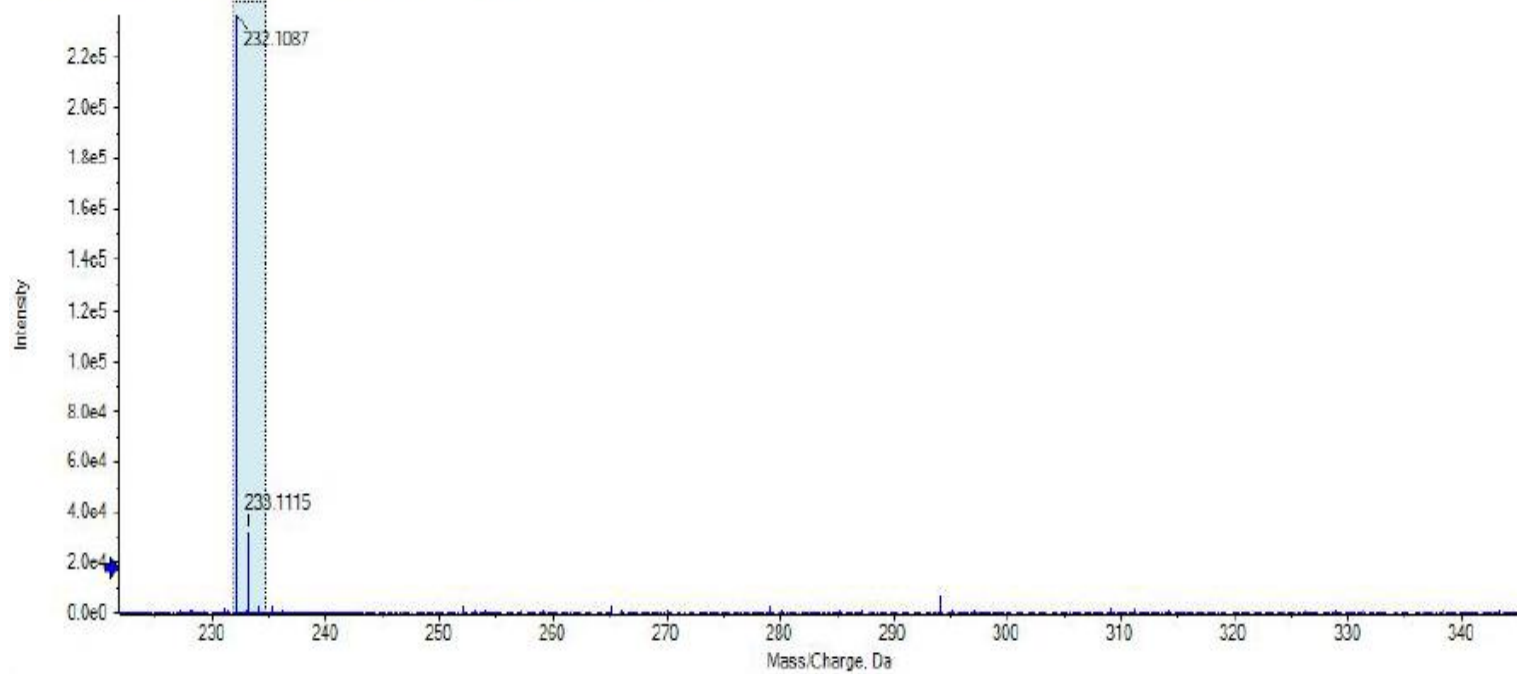



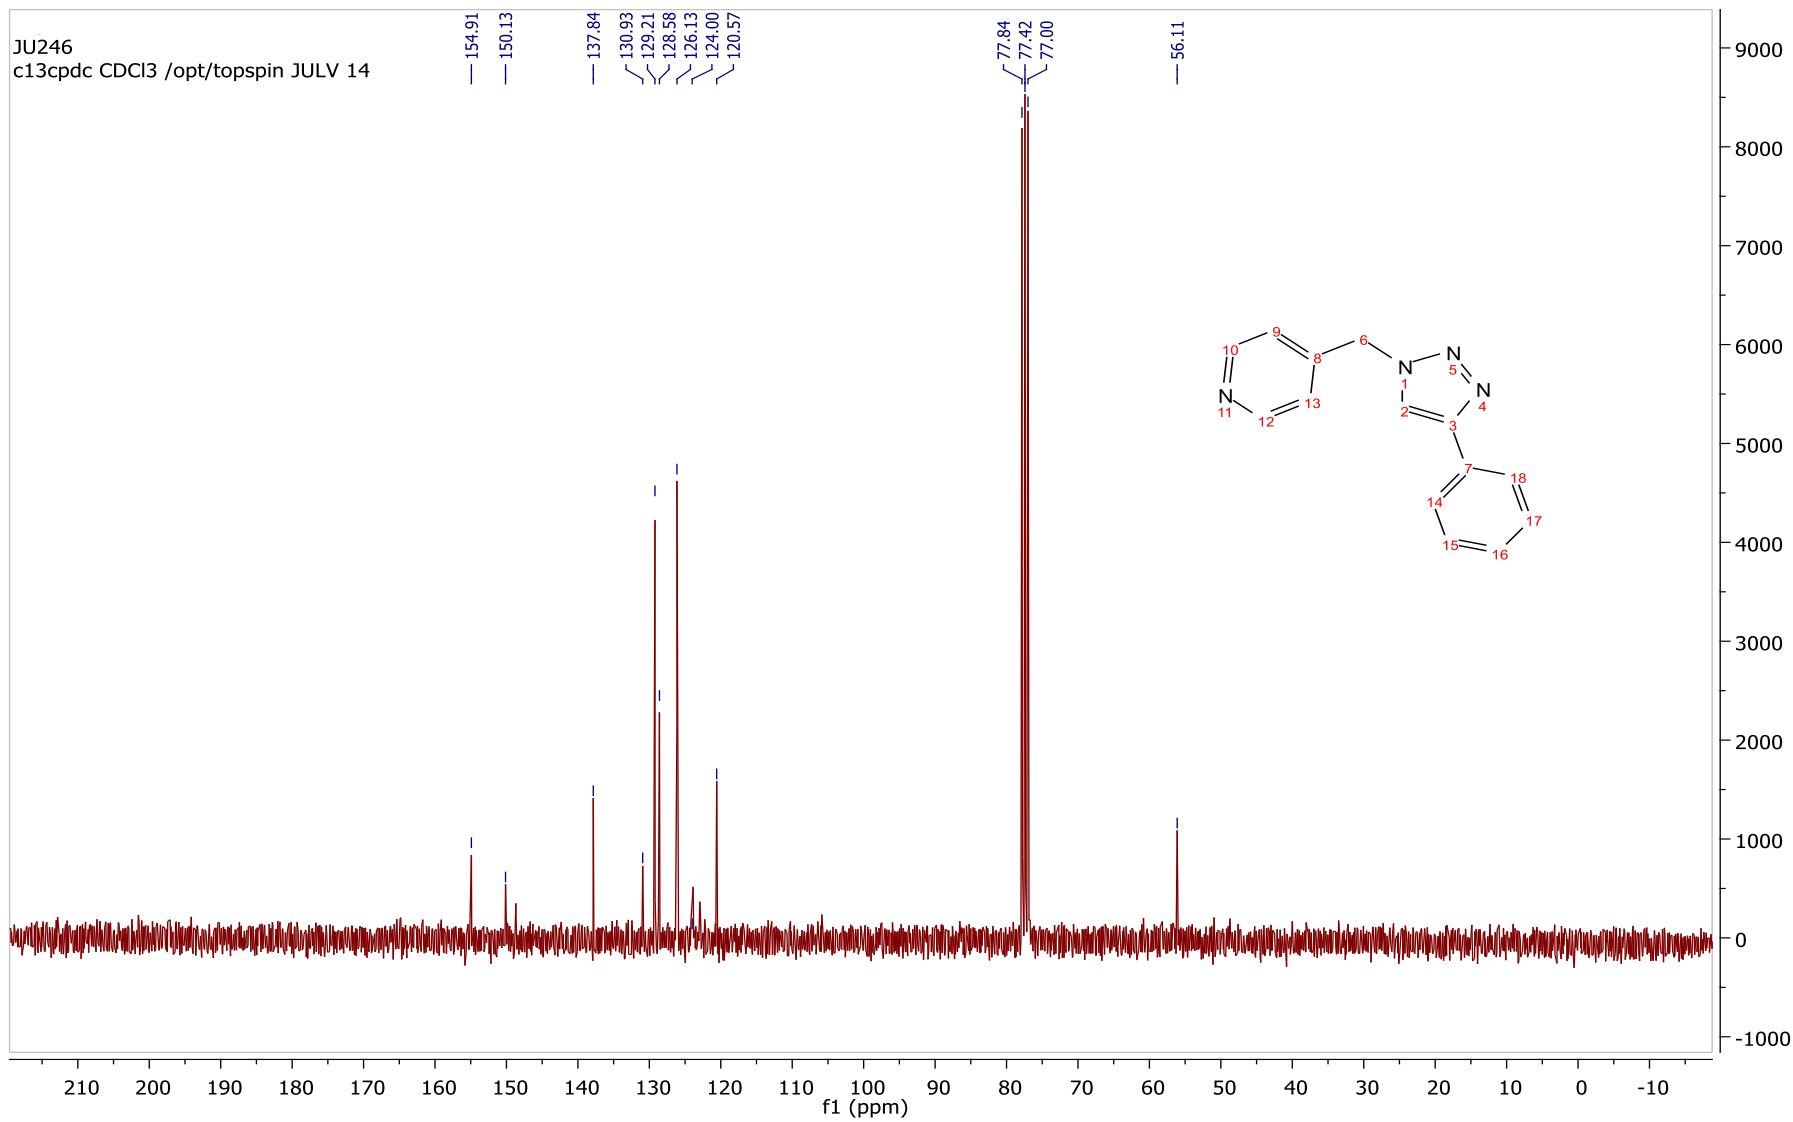

JU246  
c13dept135c CDCl3 /opt/topspin JULV 14

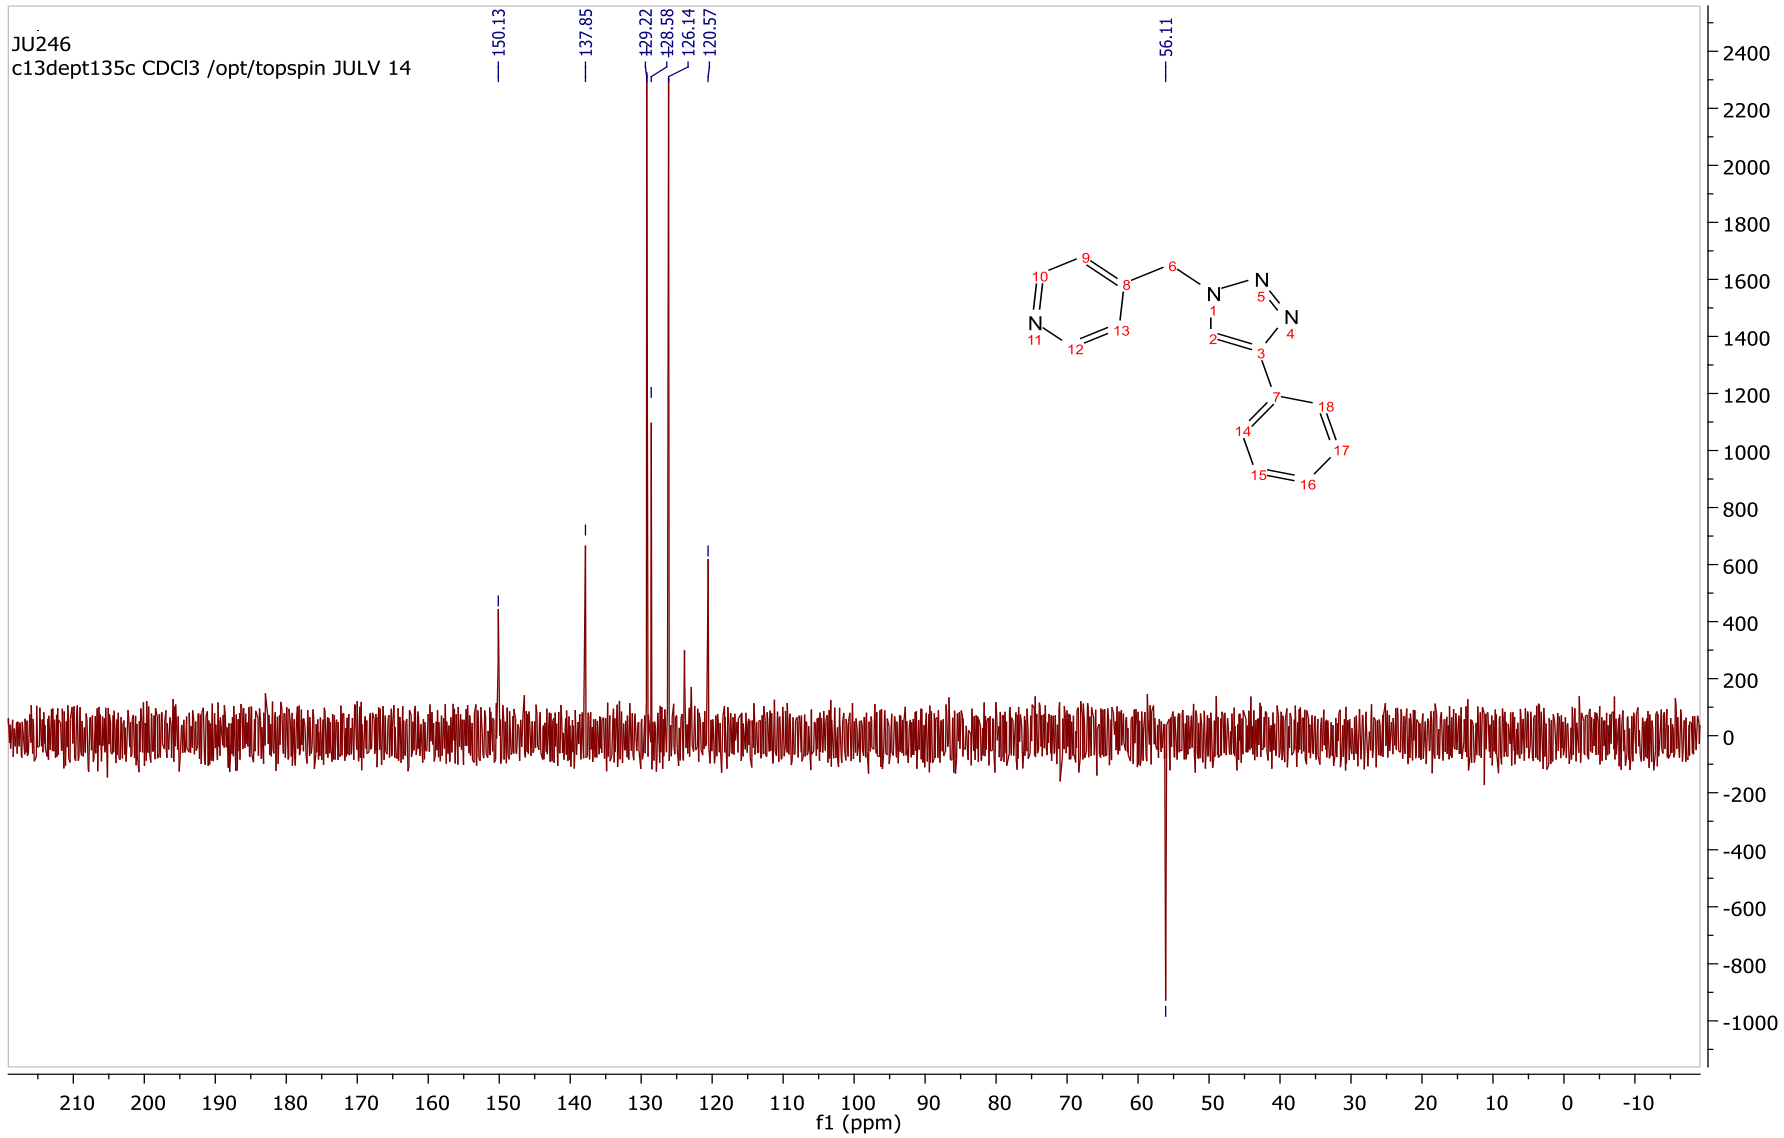

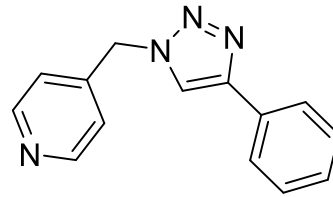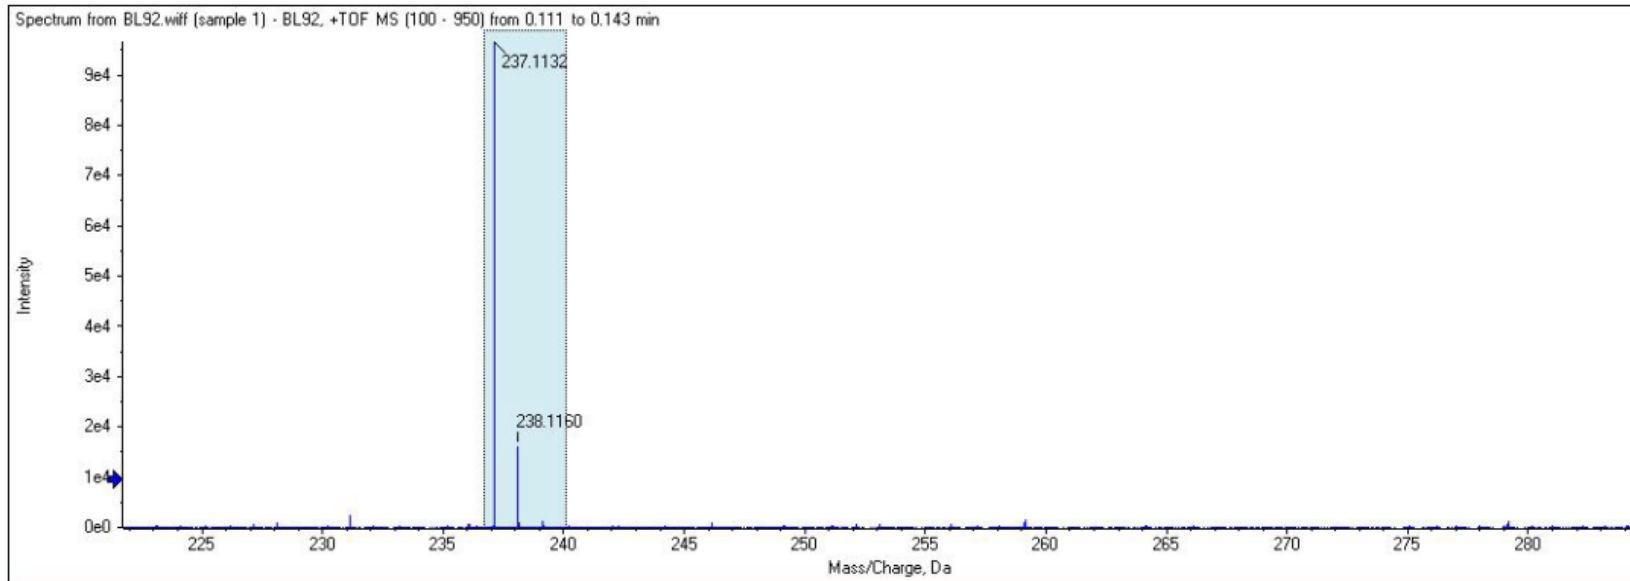

1,4-diphenyl-1*H*-1,2,3-triazole (3i)

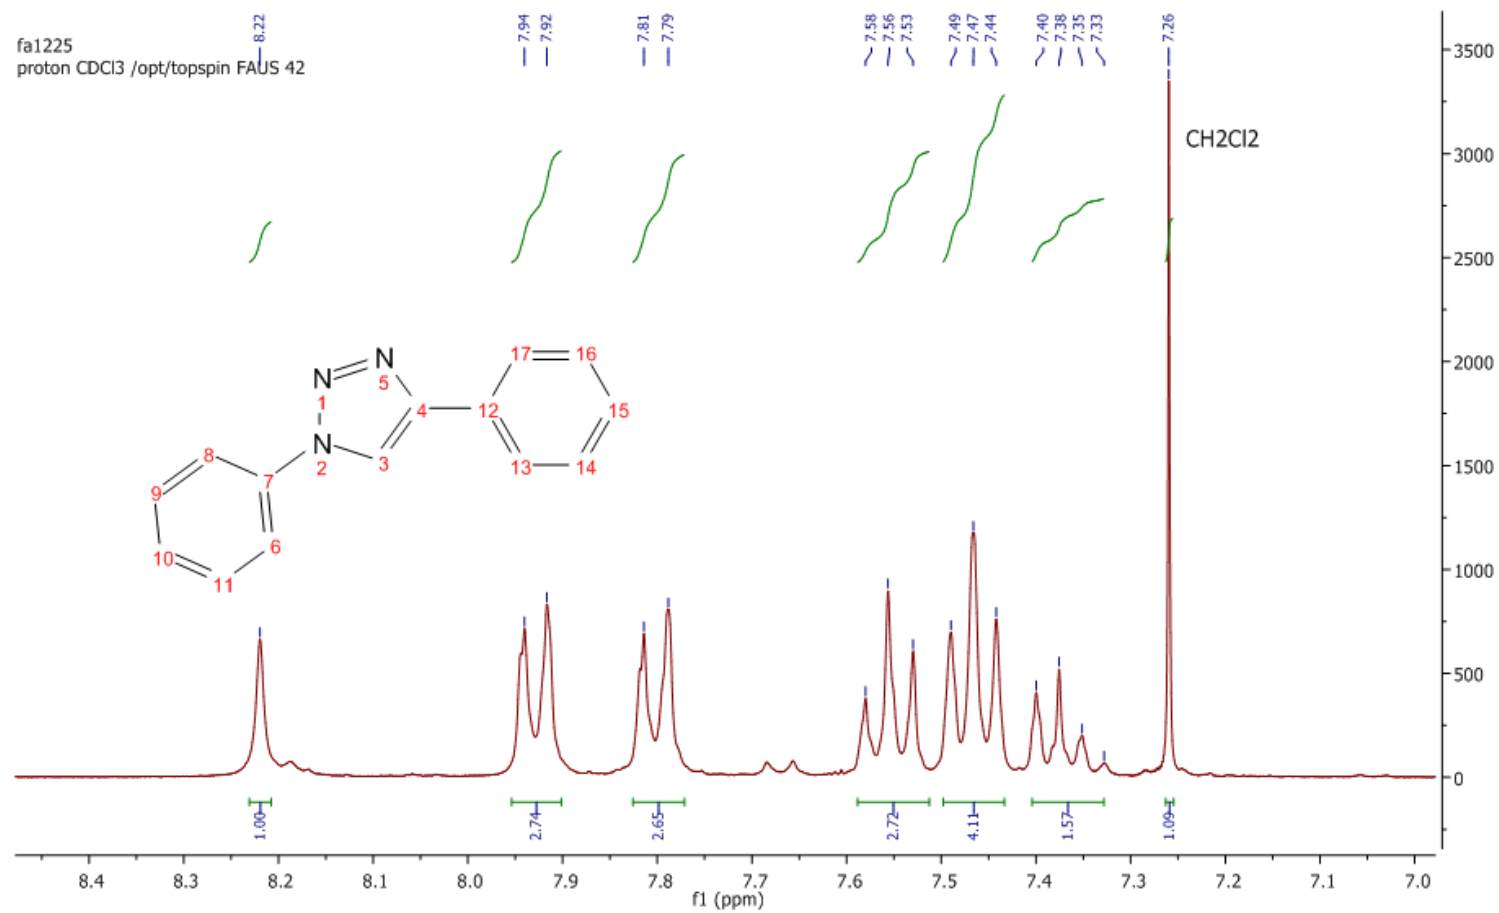

fa1225  
c13cpdc CDCl3 /opt/topspin FAUS 42

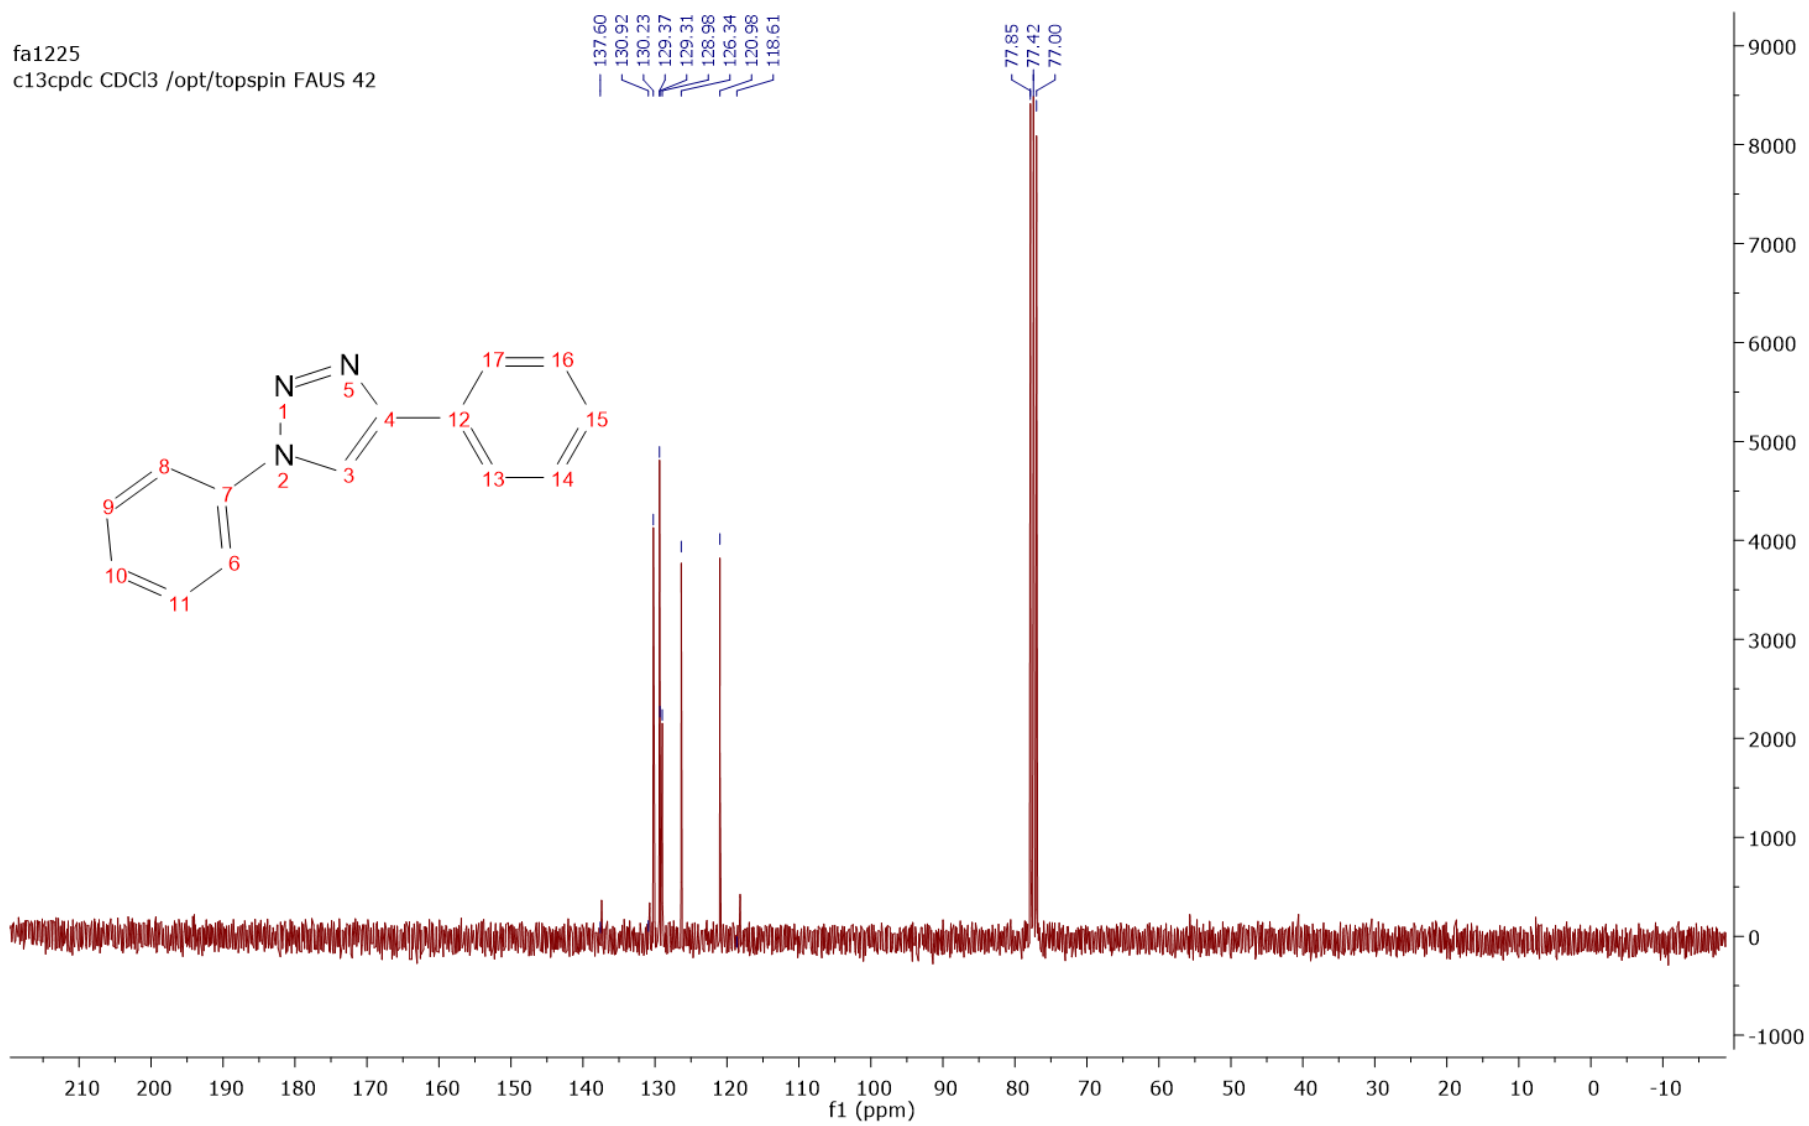



fa1225  
c13dept135c CDCl3 /opt/topspin FAUS 42

130.23  
129.37  
129.32  
128.98  
126.35  
120.98  
118.17

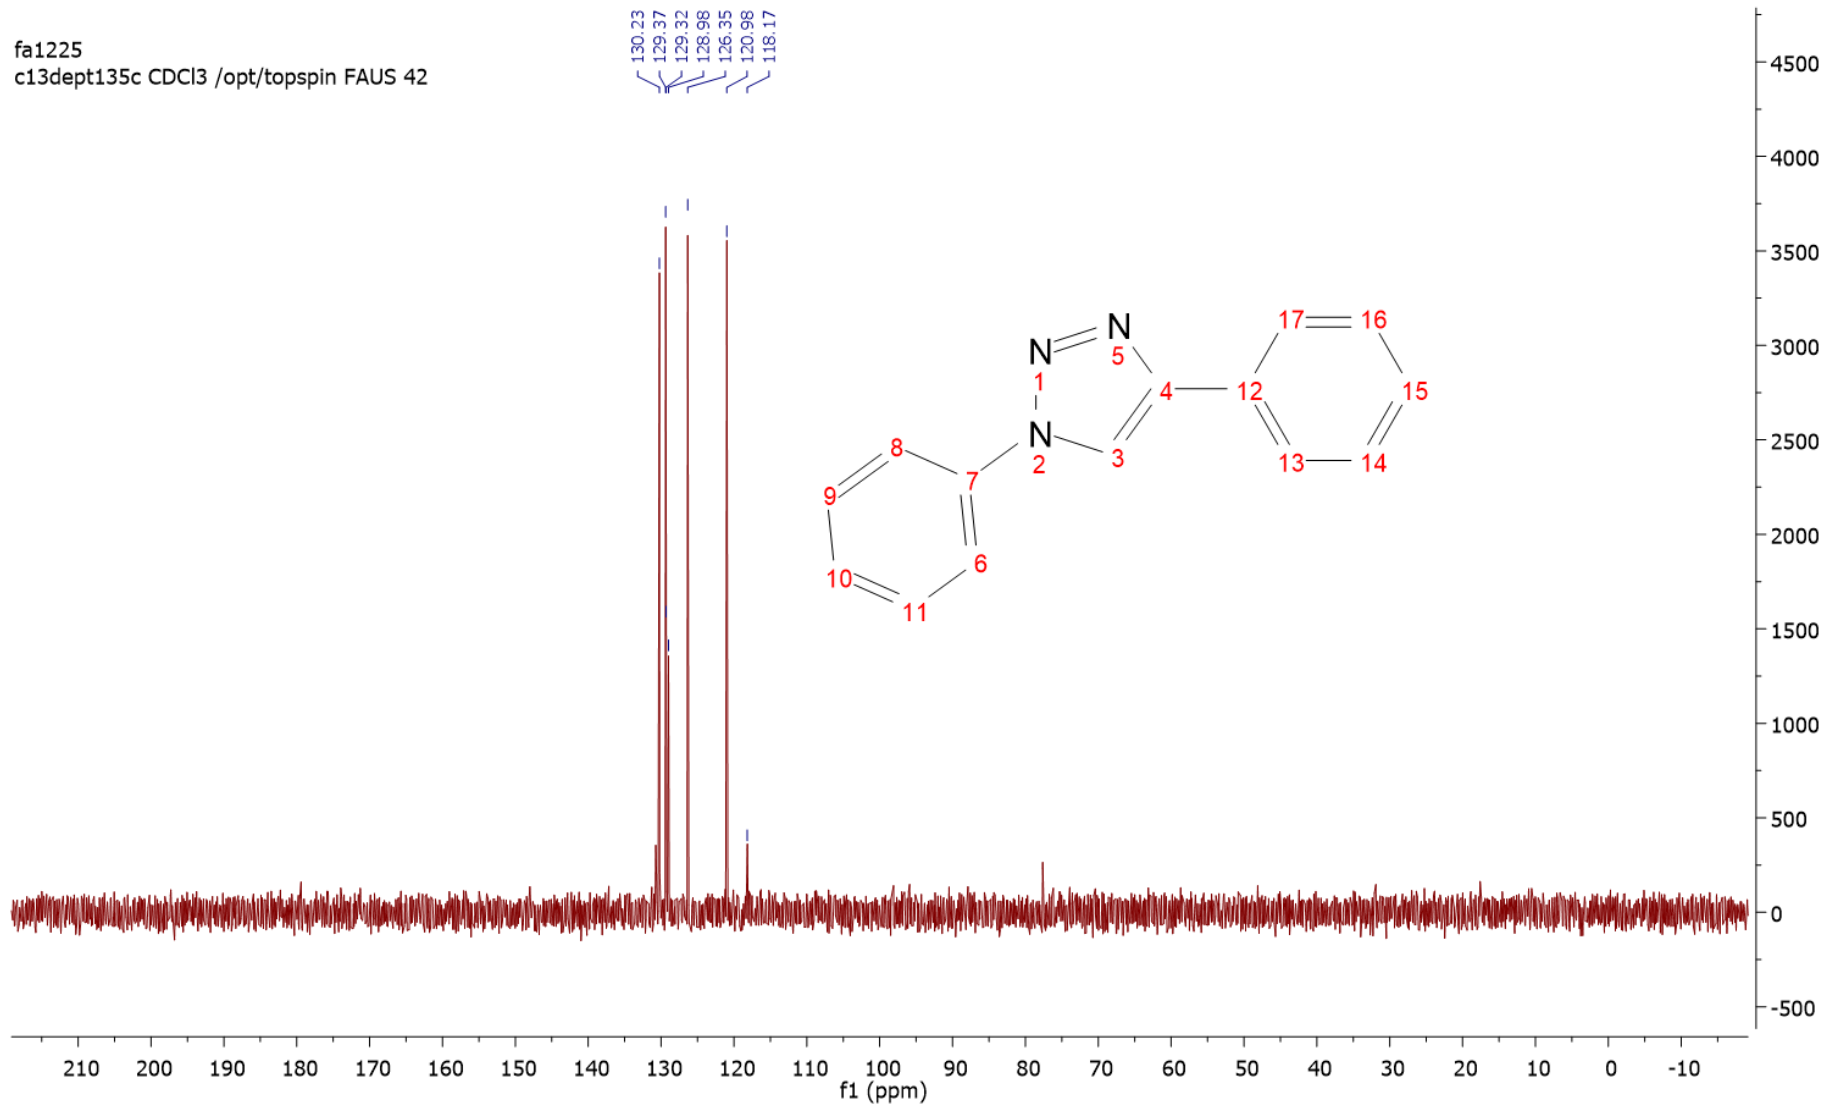

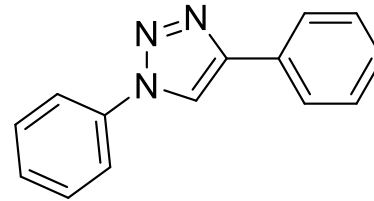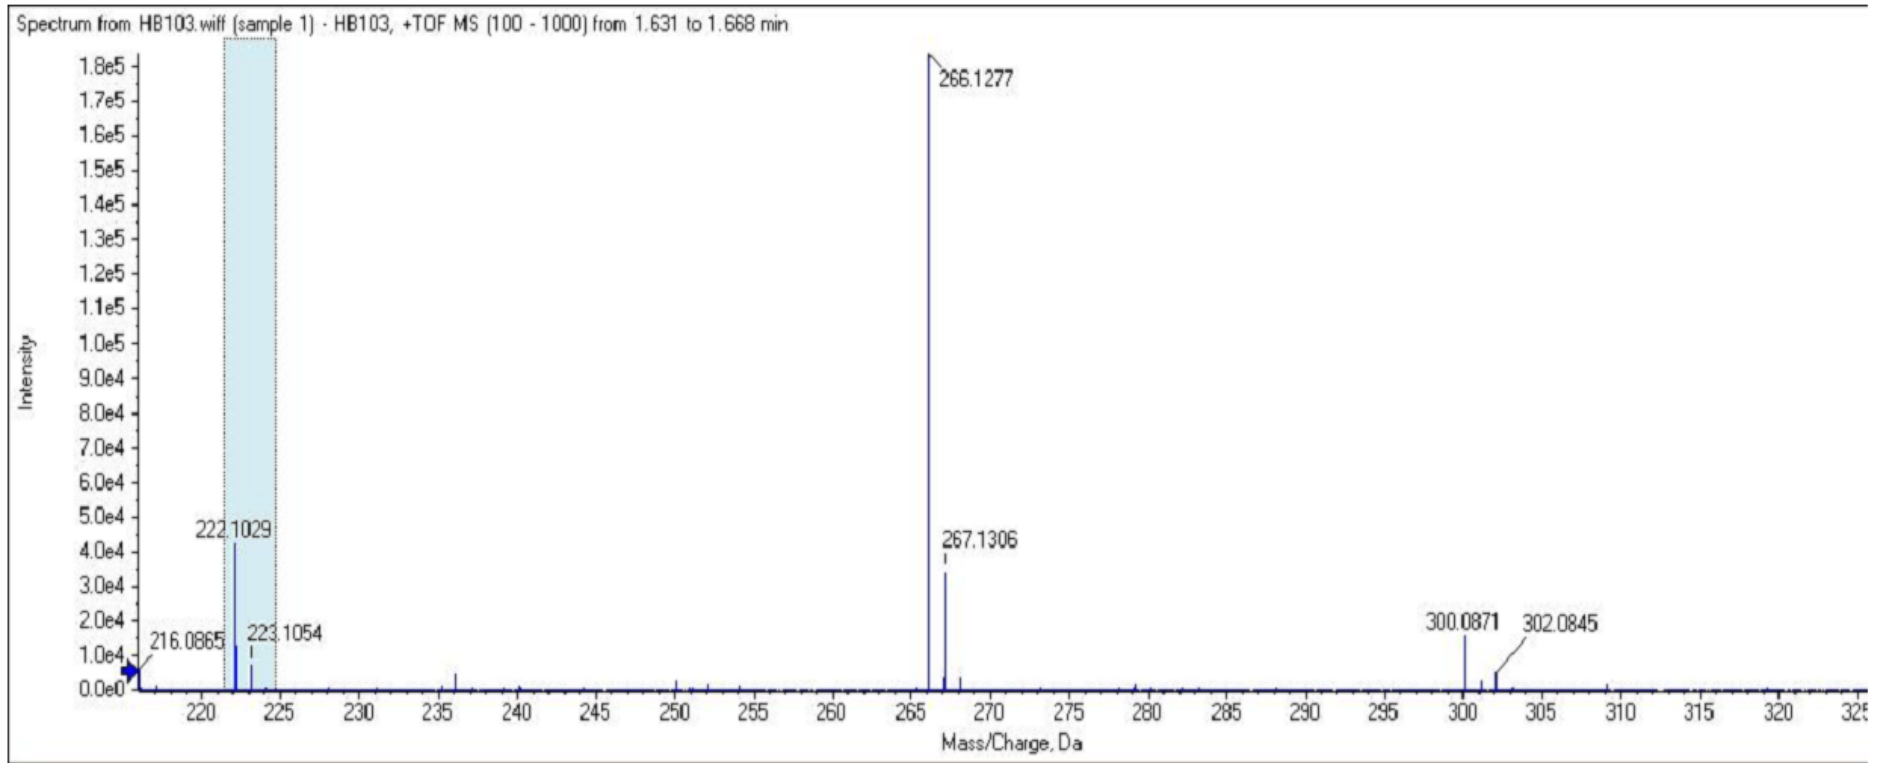

**4-(phenoxyethyl)-1-phenyl-1H-1,2,3-triazole (3j)**

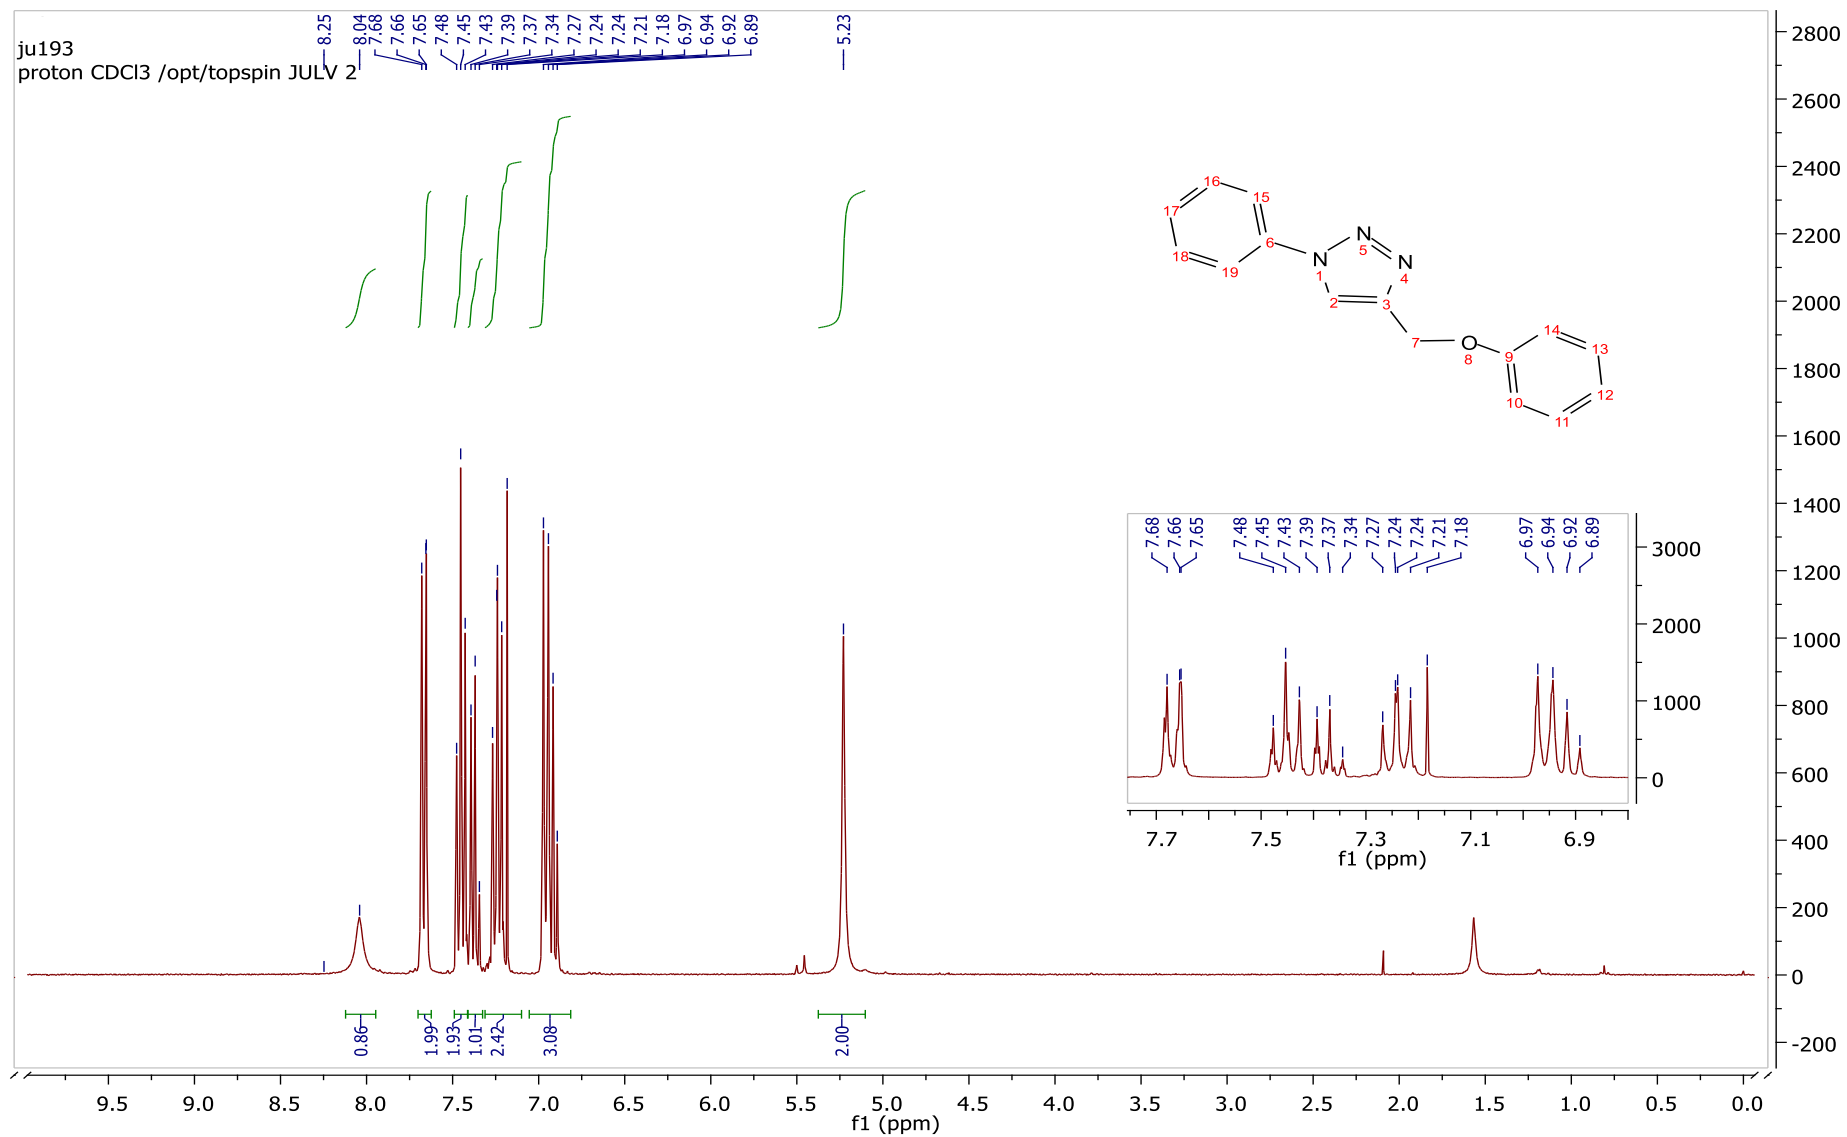

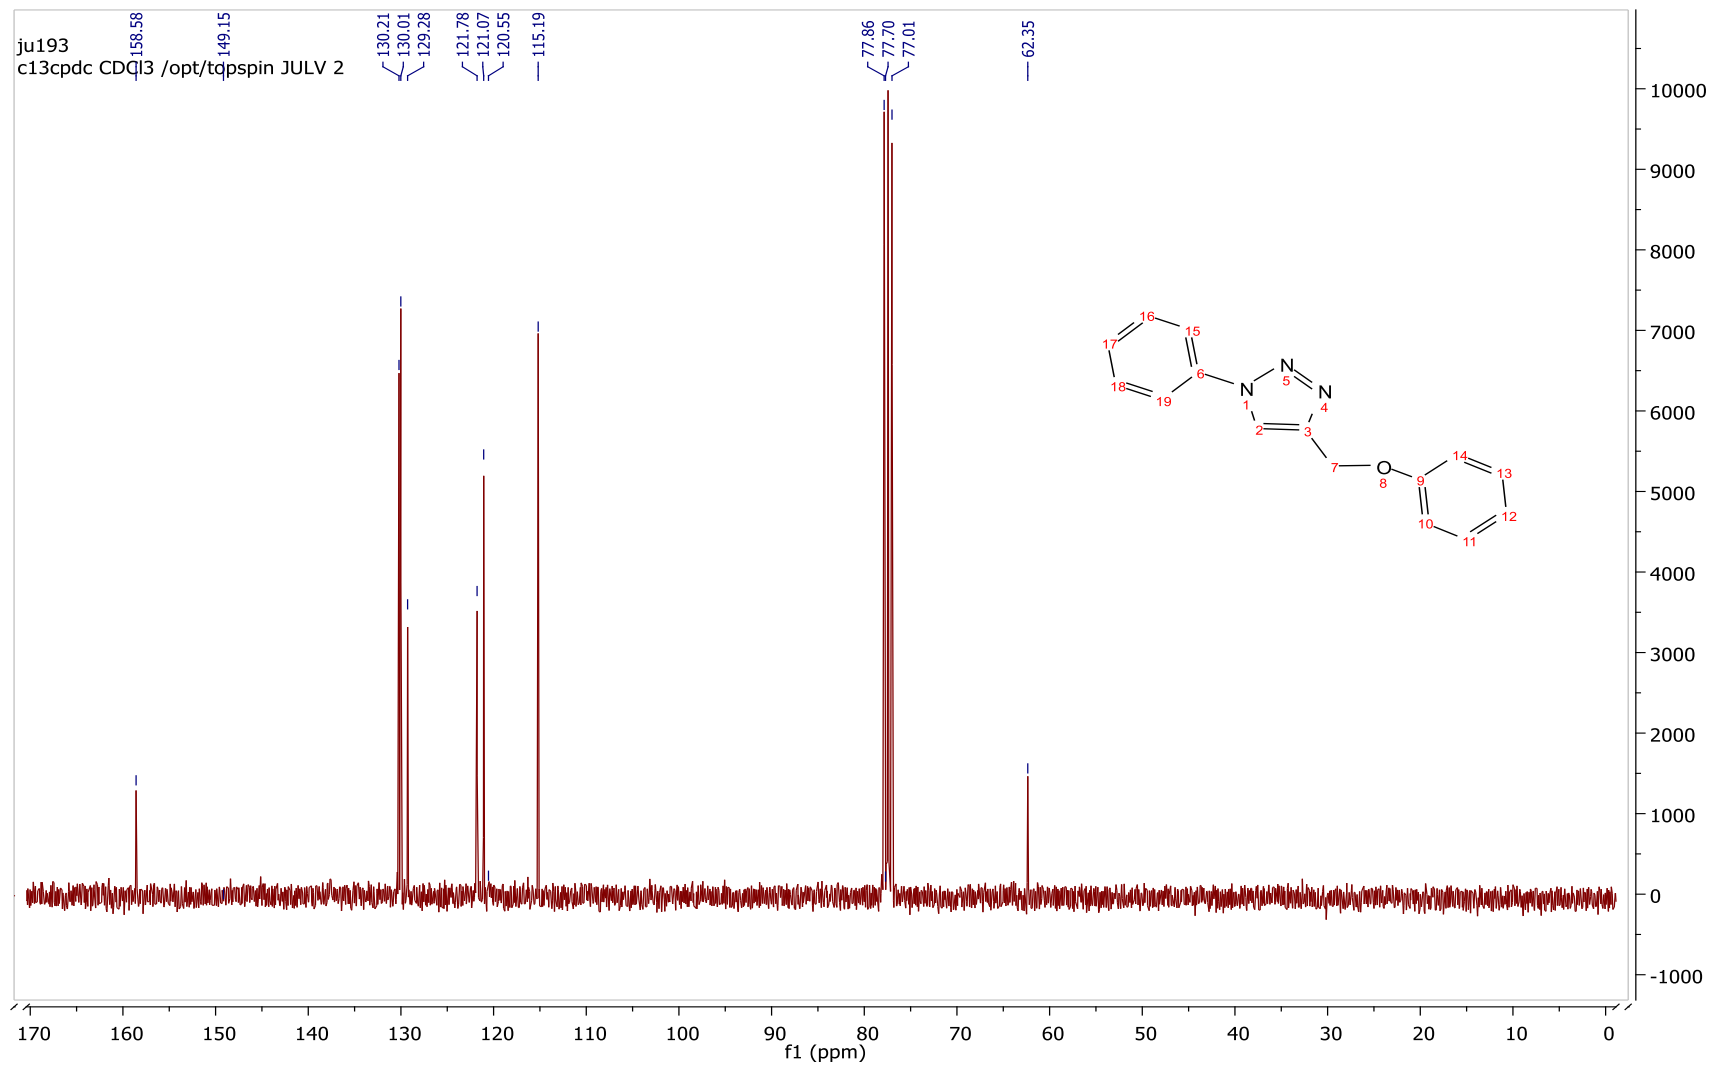

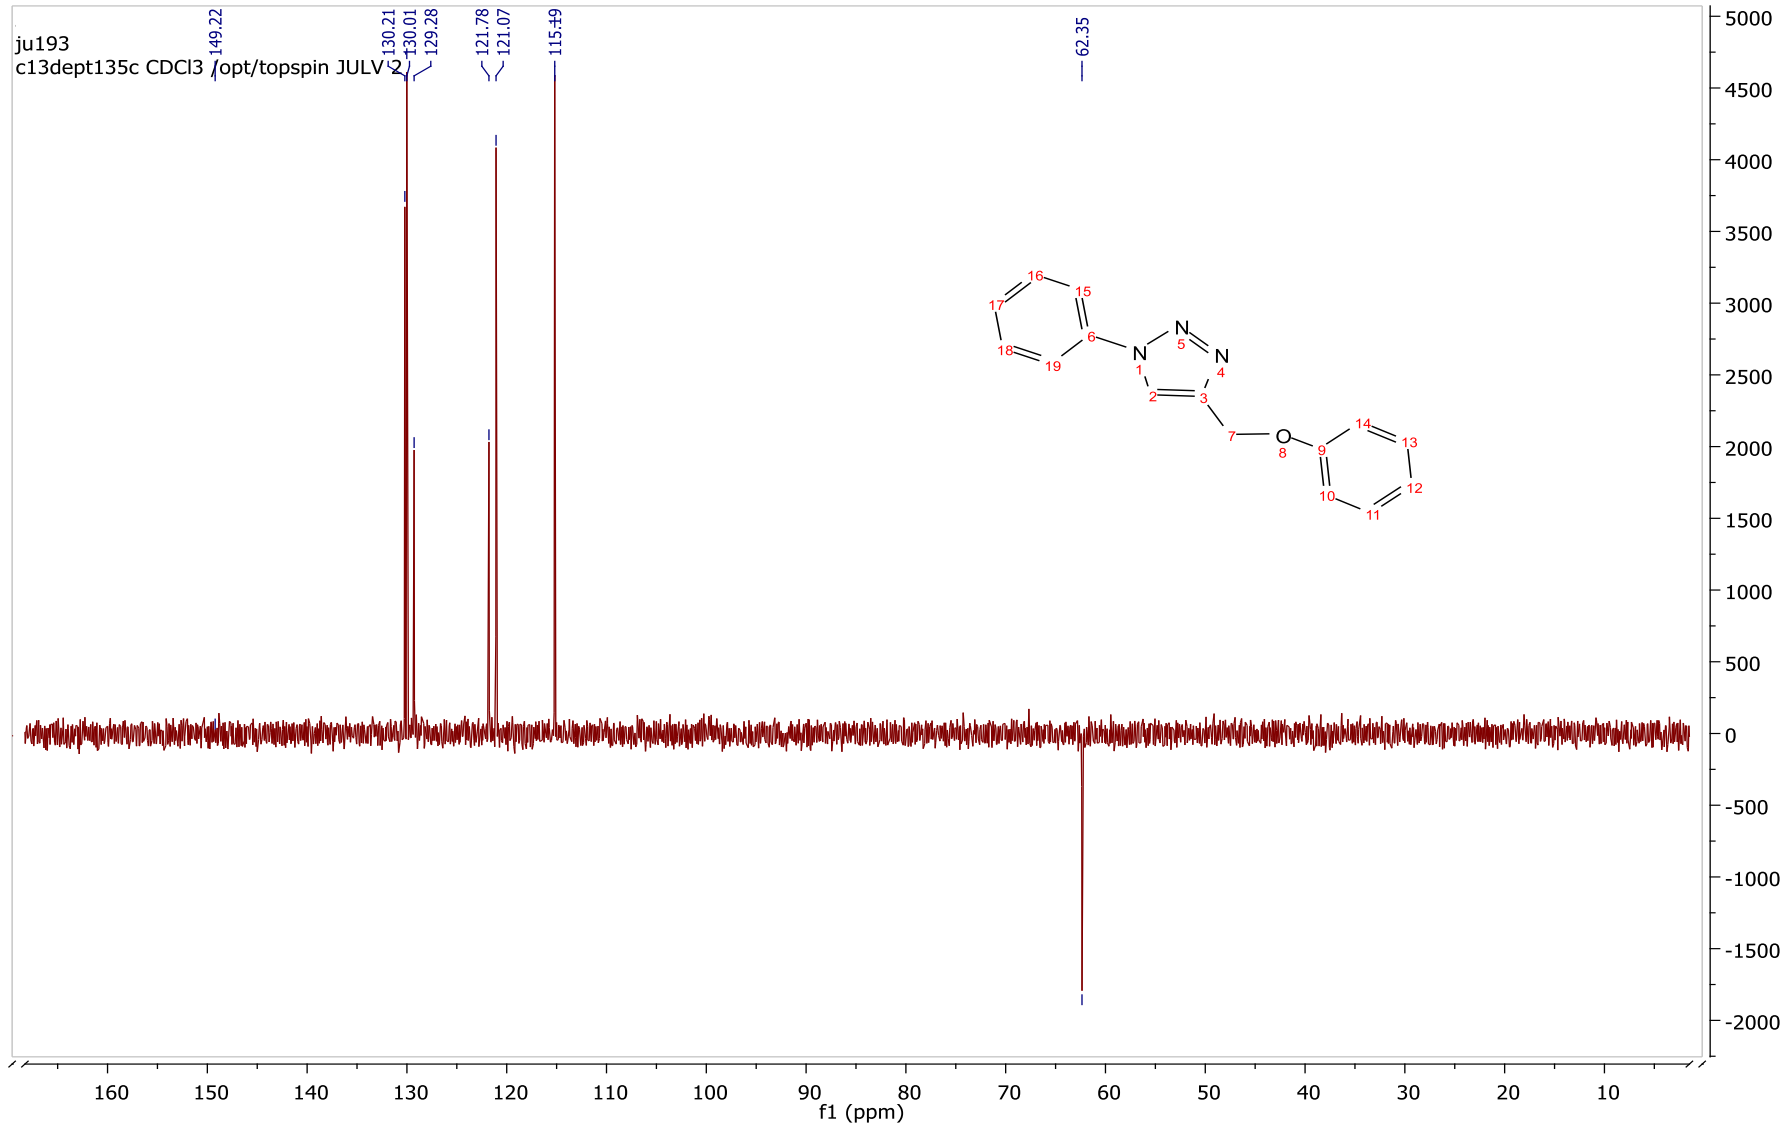

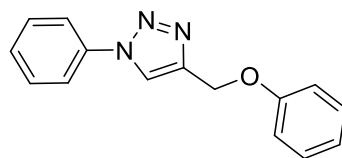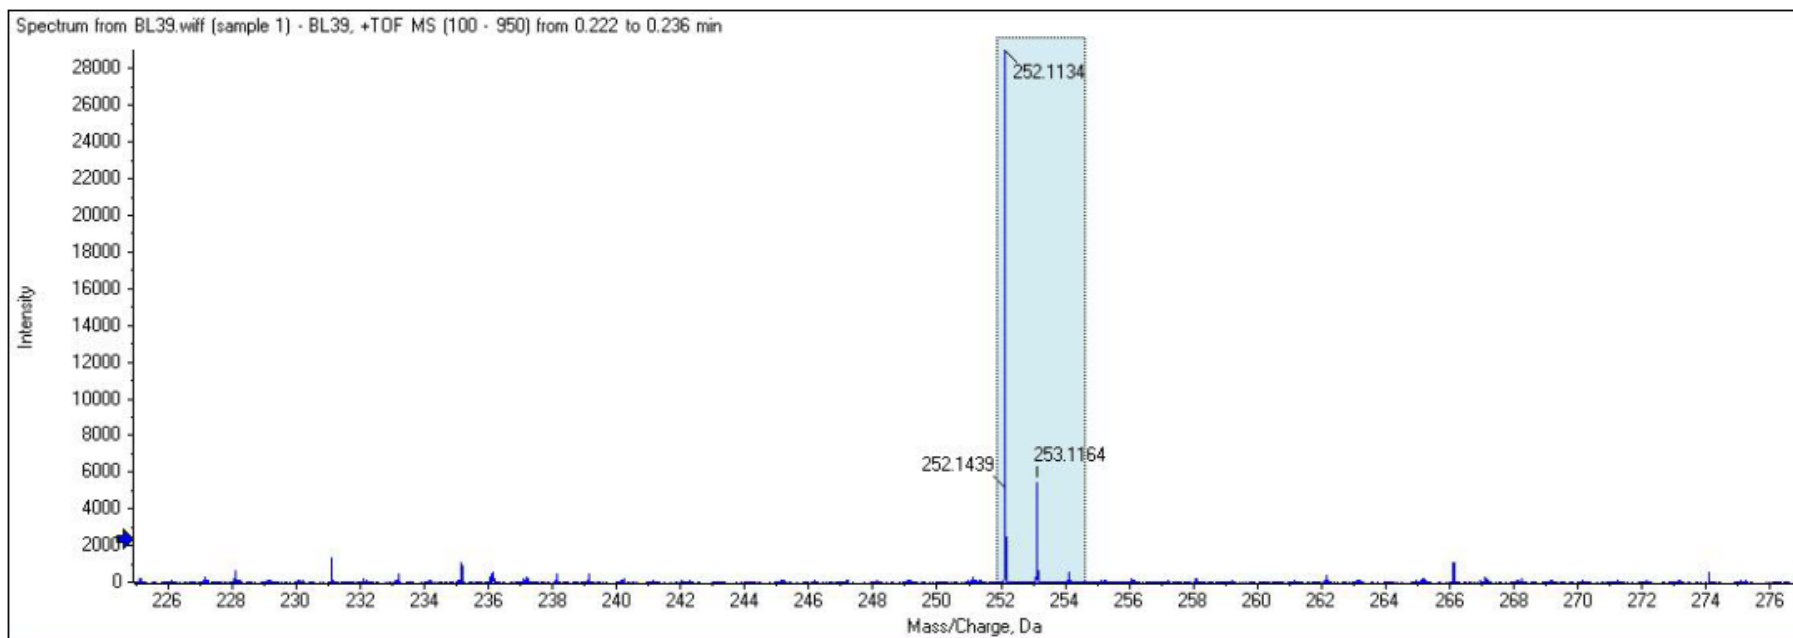

**(1-phenyl-1H-1,2,3-triazol-4-yl)methyl benzoate (3k)**

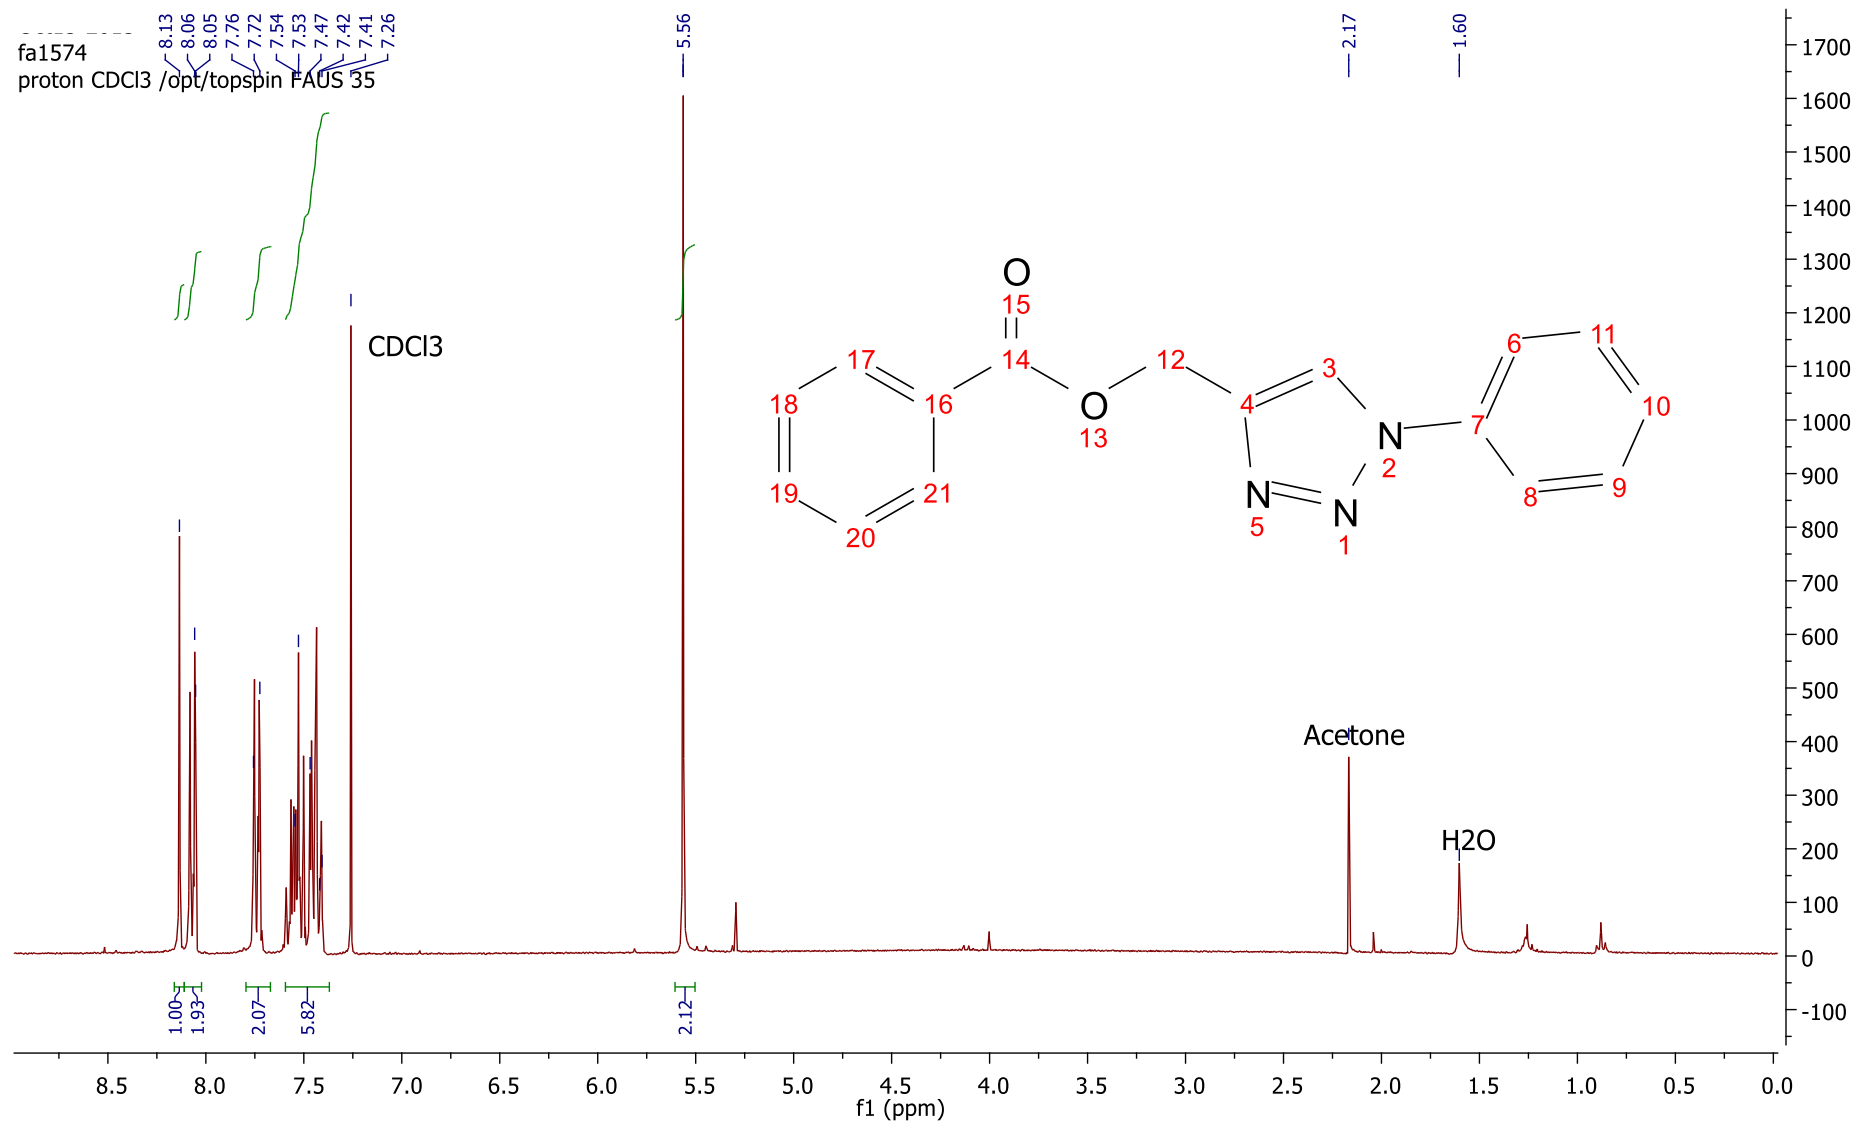

fa1574  
c13cpdc CDCl3 /opt/topspin FAUS 35 |

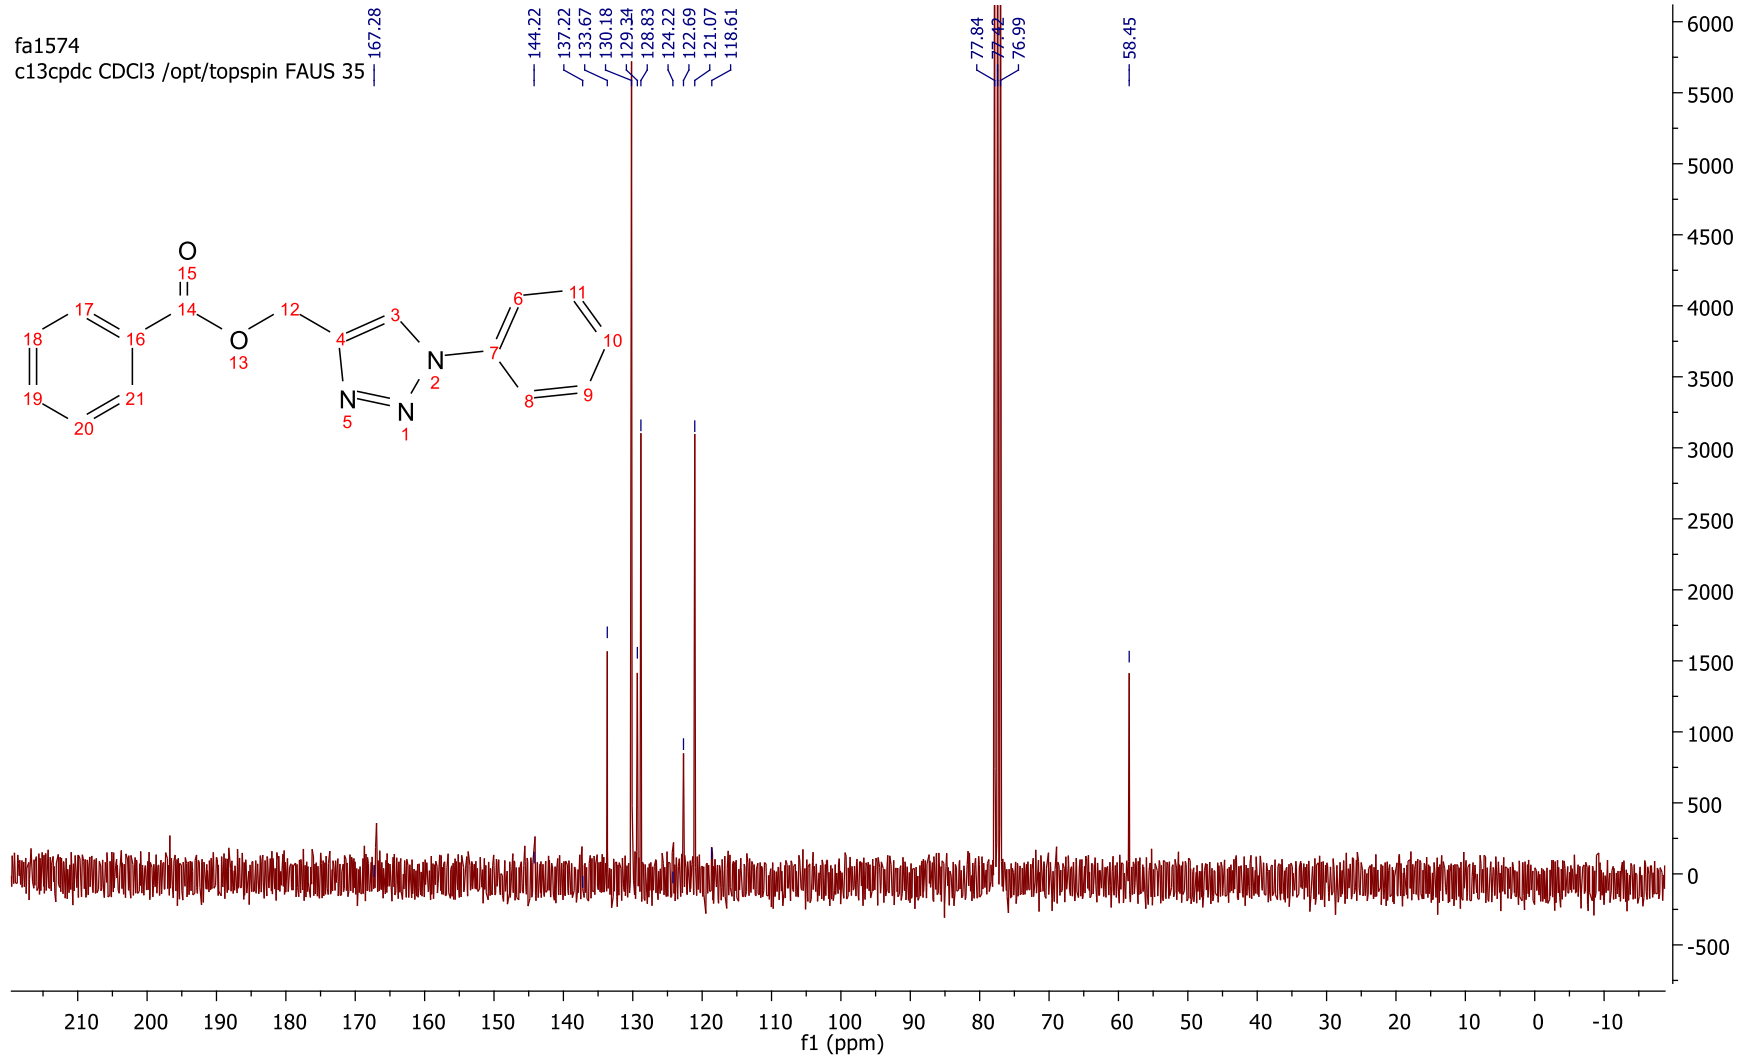



fa1574  
c13dept135c CDCl3 /opt/topspin FAUS 35

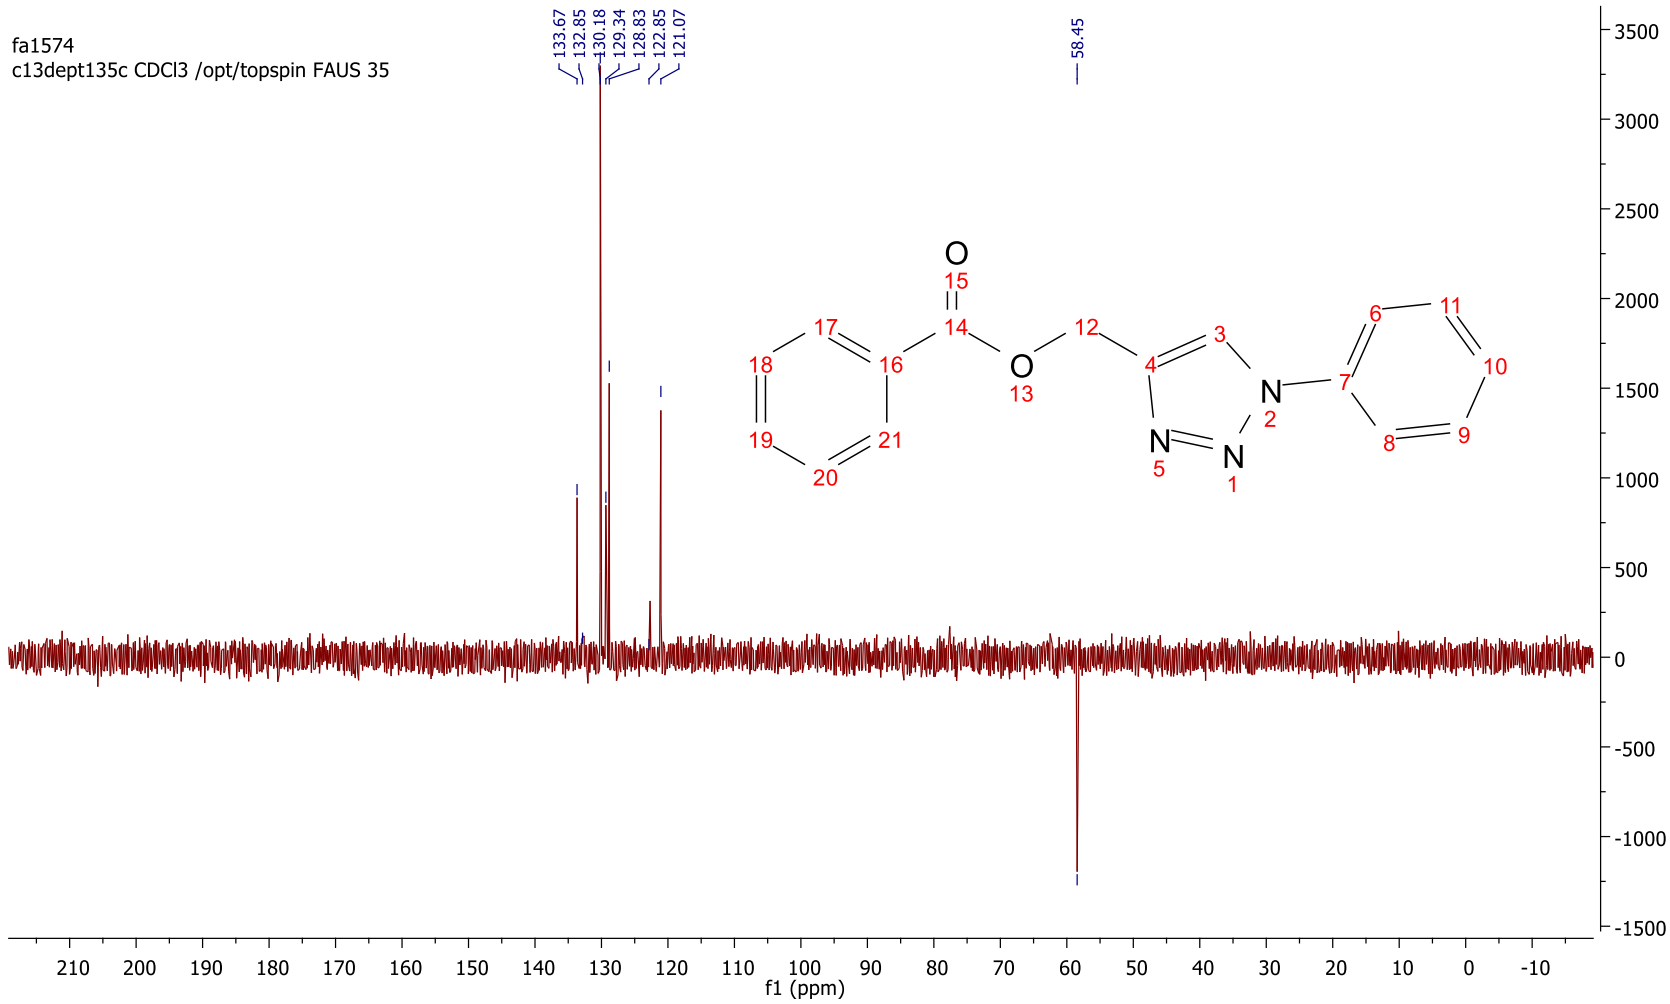

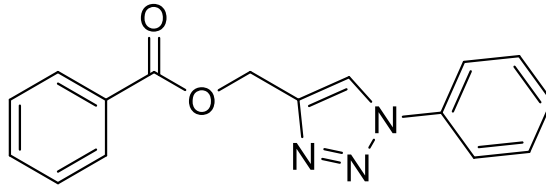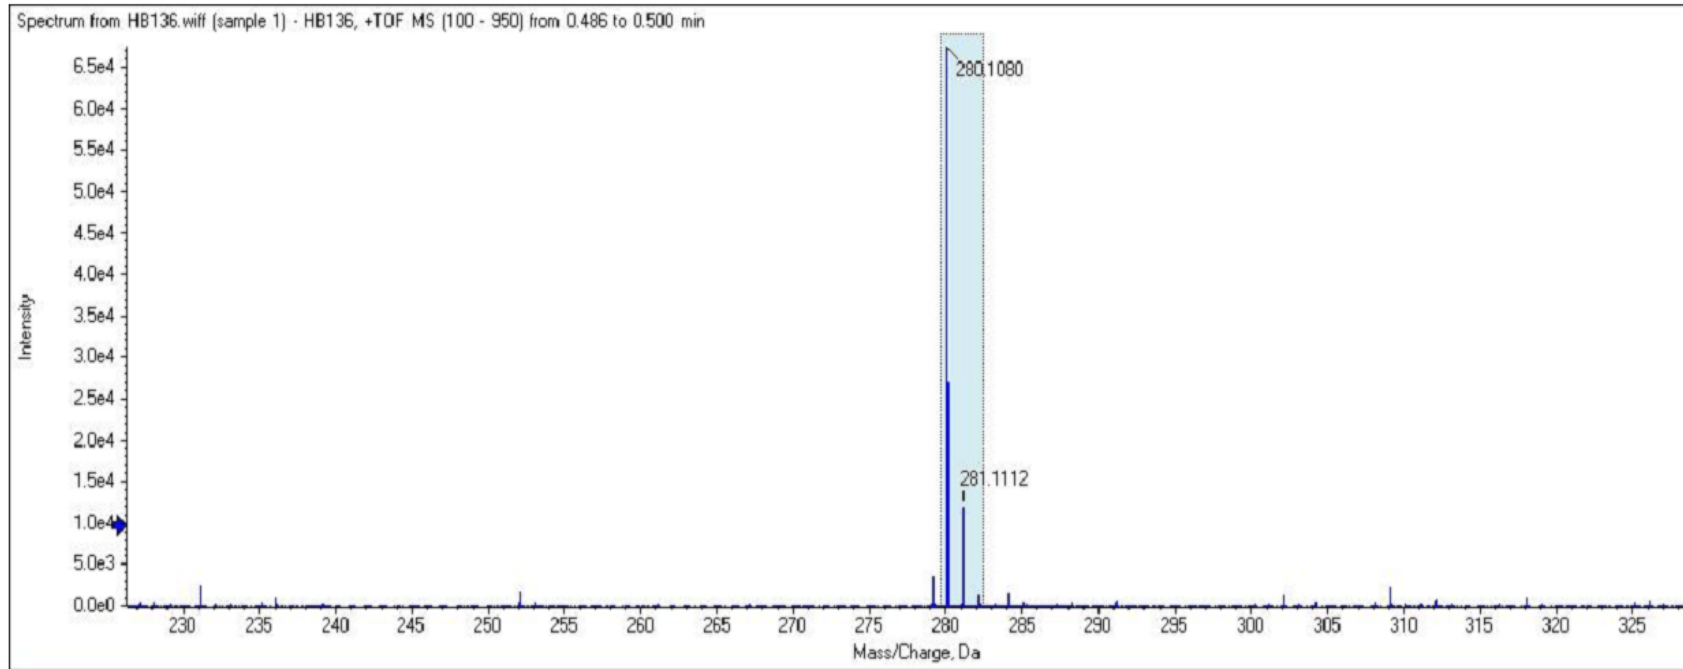

Supplement: d4su00292j1.pdf [file d4su00292j1.pdf]
